# Supplementary material for: Effectiveness and cost-effectiveness of eliminating cervical cancer through a tailored optimal pathway: a modeling study
Source: Springer Nature journal article supplement (doi:10.1186/s12916-021-01930-9), 2021-03-03
Supplement: MOESM2 [file 18925690]

# Effectiveness and cost-effectiveness of eliminating cervical cancer through a tailored optimal pathway: a modelling study

## Supplementary appendix

Changfa Xia, Xiaoqian Xu, Xuelian Zhao, Shangying Hu, Youlin Qiao, Yong Zhang, Raymond Hutubessy, Partha Basu, Nathalie Broutet, Mark Jit, Fanghui Zhao

### Contents

|                                                       |           |
|-------------------------------------------------------|-----------|
| <b>1. Methods</b> .....                               | <b>2</b>  |
| <i>1.1 Model structure</i> .....                      | 2         |
| <i>1.2 Parameters</i> .....                           | 3         |
| <i>1.3 Demographic and epidemiological data</i> ..... | 9         |
| <i>1.4 Model calibration</i> .....                    | 12        |
| <i>1.5 Strategy selection</i> .....                   | 16        |
| <b>2. Results</b> .....                               | <b>26</b> |
| <i>2.1 Sensitivity analysis</i> .....                 | 26        |
| <i>2.2 Annual costs and benefits</i> .....            | 32        |
| <i>2.3 Use GDP per capita as threshold</i> .....      | 39        |
| <i>2.3.1 Main results</i> .....                       | 39        |
| <i>2.3.2 Annual costs and benefits</i> .....          | 44        |
| <b>3. References</b> .....                            | <b>49</b> |

## **1. Methods**

### ***1.1 Model structure***

Model structure shown in Figure S1 illustrates the sexual mixing between males and females, and the natural history of high-risk human papillomavirus (HPV) infection and cervical cancer among females. This is a hybrid model consisting a dynamic model and a natural history model. We used the dynamic model to simulate the HPV transmission between males and females, whereas the natural history model was employed to simulate the natural history of cervical cancer and to obtain the number of cervical cancer cases and deaths associated with HPV infections.

Sexual mixing matrices for every stratum were calculated by use of partner acquisition rates and assortativity of age, area, and sexual activity [1]. Partner acquisition rates were adjusted to maintain the number of male-female sexual partnerships [1]. Neonates are assumed to be in the uninfected state at birth, and all-cause mortality was present in all states. Each individual was entered into the model at their age in 2015 or the year of their birth, if after 2015 and, within the model, they were randomly allocated to a new state, based on the transition probabilities. Individuals were transitioned between states representing no current or previous infection or vaccine (in which they were considered susceptible to infections); immunity (including infection-acquired immunity and vaccine-acquired immunity); infection; development of cervical intraepithelial neoplasia (CIN) grade 1, CIN2, or CIN3 disease (representing mild, moderate, and severe dysplasia); effective detection and treatment; and cervical cancer likely to cause death or to extend until the simulation end point [1]. We assumed that infection-acquired immunity will wane over time, whereas vaccine-acquired immunity will be lifelong. If HPV vaccination is available, individuals aged 9 years were considered to be vaccinated at predefined coverages in the dynamic model. Cervical cancer screening fits in the natural history model where screening is available [1].

Local cervical cancer without symptoms may become symptomatic or progress to more advanced stages of cervical cancer without symptoms. In the absence of screening, cervical cancer is diagnosed only when symptoms develop in which the patient is immediately treated. Females with symptomatic cervical cancer are subjected to the age-specific death and cure probability of cervical cancer. Cancer patients who remain alive 5 years after cancer diagnosis are moved to the health state “cured” and are break from the model in the rest of simulations.

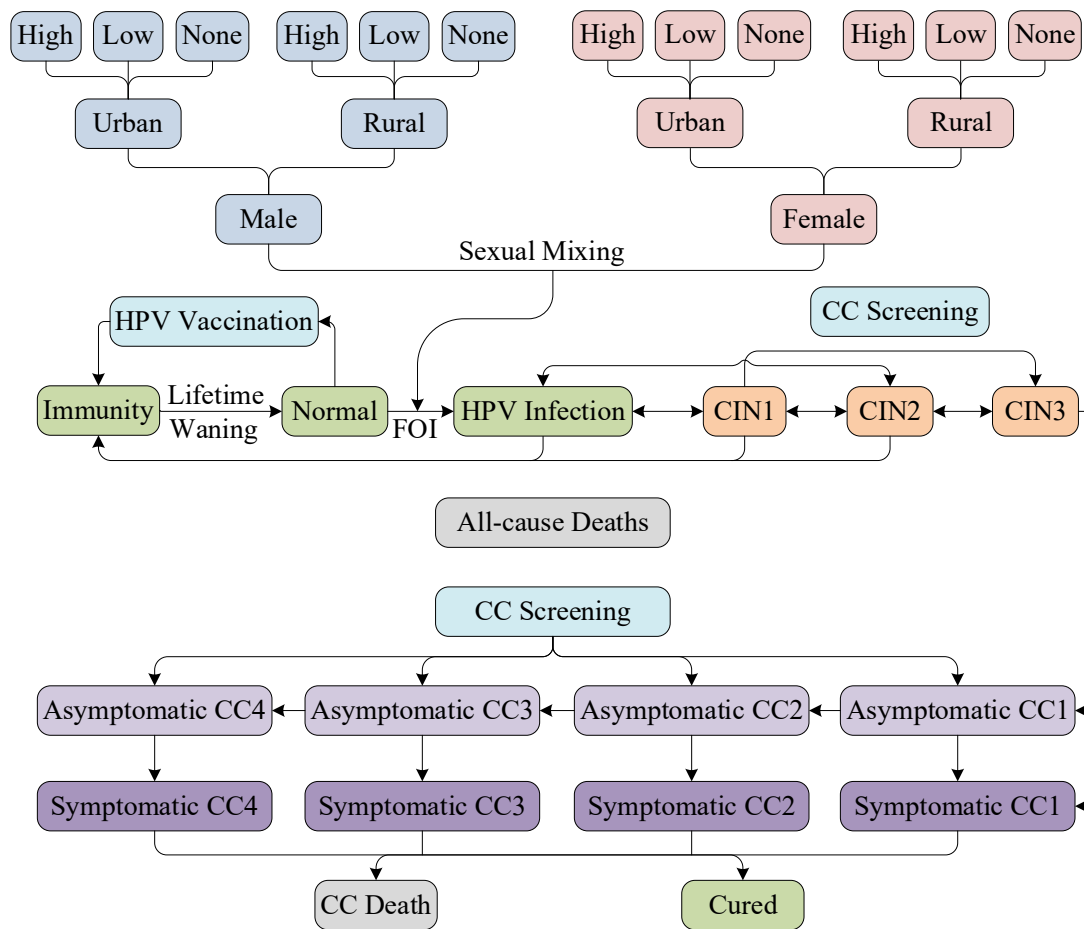

**Figure S1.** Model structure

*Individuals with multiple sexual partners are regarded as having high sexual activity level, while individuals with only one sexual partner are regarded as having low sexual activity level.*

*Abbreviations: HPV, human papillomavirus; FOI, force of infection; CIN, cervical intraepithelial neoplasia; CC, cervical cancer.*

## 1.2 Parameters

Taking considerations of the price of HPV vaccine and the preference of Chinese authorities, China would most likely to introduce domestically-manufactured HPV vaccine into its national immunization program (NIP) [2-4]. The first Chinese domestic *Escherichia coli*-produced bivalent human papillomavirus vaccine (Xiamen Innovax) has been approved by the National Medical Products Administration (NMPA) in 2019 [5, 6], and its first commercial price (about \$46 per dose) is much lower than that of imported bivalent vaccine [7]. In June 2020, another domestic HPV vaccine manufacturer announced that Walvax expects to get approved by Chinese regulatory authorities in 2021, followed by an application to WHO for prequalification [8]. By July 2020, there are more than 10 domestically-manufactured vaccines are undergoing phase II or phase III clinical

trials in China. There is a possibility of price competition between HPV vaccine manufacturers in a few years. Moreover, the price of the domestically-manufactured HPV vaccine is likely to be as low as \$3.00 per dose [8, 9]. It is noteworthy that the total price of 22 doses of Type 1 vaccines included in the National Expanded Program on Immunization (EPI) in China was only \$19.08/child in 2015 [10]. As such, we assumed the cost of the government-delivered bivalent HPV vaccine would be the same as that enabled by Gavi, the Vaccine Alliance, namely \$4.6 per dose for Cervarix [9].

The price of government-delivered 9-valent HPV vaccine was estimated by two approaches of mutual corroboration: 1). Prices of US CDC-delivered 9-valent HPV vaccine (Merck) and Hepatitis B vaccine (Merck) are \$187.01 and \$12.53 per dose [11], while the price of Hepatitis B vaccine from Chinese CDC is only \$0.43 (3.04 Chinese yuan [CNY]) per dose [12]. Using the price ratio from US, we estimated the price of 9-valent HPV vaccine would be \$6.48 per dose. 2). Prices of government-delivered and commercial Hepatitis B vaccine (both 10 micrograms of yeast-derived recombinant hepatitis B vaccine) in China are \$0.43 (3.04 CNY) and \$11.93 (83.5 CNY) per dose, while the commercial price of 9-valent HPV vaccine is \$185.43 (1298 CNY) per dose [12]. Using the price ratio of commercial and government-delivered vaccines, we estimated the price of 9-valent HPV vaccine would be \$6.75 per dose. Combining the estimates from the above two approaches, the price of Chinese government-delivered 9-valent HPV vaccine would be \$6.6 per dose in 2031 onwards.

Screening strategy using HPV DNA testing as primary screening (with genotyping) and cytology triage was simulated in our model, namely women positive by HPV16/18 will be referred to colposcopy and women positive by other 11 oncogenic types will be triaged with liquid-based cytology (LBC). We adopt the prices and proportions provided by cost calculation table of cervical cancer screening program organized by the government. However, the prices of HPV-test vary greatly in different cities and counties. For example, price of HPV-test in Beijing is estimated at 90 CNY [13], while the unit purchase price of HPV-test reported in Hainan province is only 19 CNY [14]. Considering that the price of HPV-test in China is constantly decreasing and the unit price of government procurement in many regions is below 40 CNY [14-16], the materials price of HPV-test would be the same of *careHPV* test, namely 35 CNY. HPV-testing related equipment costs, personnel costs, non-medical costs, and indirect cost are estimated based on our previous national-wide cervical cancer screening demonstration research project and the prices have been converted to that in 2020 [17]. Consistent with government provided cost calculation table and our population-based pooled data, we estimate that 15% of women will receive a positive results of high-risk HPV infection with HPV-testing as primary screening test, and 4% of women will be positive for HPV16/18 infection [18, 19].

**Table S1.** Cervical cancer screening costs (Chinese yuan, CNY)

| Subjects                                       | Urban area                 |          | Rural area          |          |       |
|------------------------------------------------|----------------------------|----------|---------------------|----------|-------|
|                                                | Unit price                 | Subtotal | Unit price          | Subtotal |       |
| Gynecological examination                      | 15                         | 15       | 15                  | 15       |       |
| Materials                                      | 35                         | 35       | 35                  | 35       |       |
| Equipment[17]                                  | 0.5                        | 0.5      | 0.5                 | 0.5      |       |
| HPV test                                       | 15                         | 15       | 6                   | 6        |       |
| Non-medical costs[17]                          | 5                          | 5        | 2                   | 2        |       |
| Indirect cost[17]                              | Direct cost<br>×25%        | 13.88    | Direct cost<br>×25% | 10.88    |       |
| LBC (11% from HPV test)                        | 66                         | 7.26     | 66                  | 7.26     |       |
| Colposcopy (50% from LBC and 4% from HPV test) | 60                         | 5.7      | 60                  | 5.7      |       |
| Medical service fee of colposcopy referral     | 10                         | 0.95     | 10                  | 0.95     |       |
| Histopathology (50% from colposcopy)           | 160                        | 7.6      | 160                 | 7.6      |       |
| <b>Total</b>                                   | CNY (Chinese yuan)         | ..       | 105.89              | ..       | 90.89 |
|                                                | USD (United States dollar) | ..       | 15.13               | ..       | 12.98 |

Abbreviations: HPV, human papillomavirus; LBC, liquid-based cytology.

Treatment costs of CIN and cervical cancer (CC) include direct medical cost, direct non-medical costs and indirect costs. Data of direct costs and the ratio of indirect costs and direct costs are extracted from our previous national-wide cervical cancer screening demonstration research project and the prices have been converted to that in 2020 [17, 21]. Although the cervical cancer screening guidelines recommend follow-up rather than treatment for CIN1, about 45% of Chinese women diagnosed with CIN1 will seek to medical treatment. The costs of CIN1 treatment are estimated by consultations of clinical experts providing CIN1 treatment services [1].

For newly diagnosed disease, the quality-adjusted life-years (QALYs) lost were calculated by aggregating the quality-of-life loss from pre-treatment, 1-month posttreatment, and 3-months posttreatment of precancer and cancer. For previously diagnosed diseases, we calculated QALYs using the quality of life of patients 6 months post-treatment after excluding individuals receiving 1-month terminal care and eventually dying from cervical cancer.

The range of values tested in the sensitivity analysis for each parameter was either based on the

reported 95% confidence intervals in the referenced studies or determined by assuming a 25% change from the base-case value (Table S2).

**Table S2.** Model inputs

| Parameter                       | Base case              | Range                               | Distribution | Source   |
|---------------------------------|------------------------|-------------------------------------|--------------|----------|
| <b>Transition probabilities</b> |                        |                                     |              |          |
| HPV clearance                   |                        |                                     |              |          |
| 12–24 years                     | 0.7188                 | 0.6463–0.7830                       | $\beta$      | [22-26]  |
| 25–29 years                     | 0.6984                 | 0.5898–0.7952                       | $\beta$      | [22-26]  |
| 30–39 years                     | 0.3503                 | 0.2860–0.4188                       | $\beta$      | [22-26]  |
| 40–49 years                     | 0.2048                 | 0.1118–0.3022                       | $\beta$      | [22-27]  |
| >50 years                       | 0.1004                 | 0.0546–0.1567                       | $\beta$      | [22-26]  |
| Infection to CIN1               | 0.0717 (0.2/36 months) | 0.0527–0.1121 (0.15–0.30/36 months) | $\beta$      | [25, 28] |
| CIN1 to CIN2                    | 0.2240                 | 0.1608–0.2972                       | $\beta$      | [22-26]  |
| CIN2 to CIN3                    | 0.3498                 | 0.2623–0.4372                       | $\beta$      | [22-26]  |
| CIN3 to CCI                     | 0.1019                 | 0.0764–0.1274                       | $\beta$      | [22-26]  |
| CIN1 to infection/immunity      | 0.7008                 | 0.6077–0.7933                       | $\beta$      | [22-26]  |
| CIN2 to CIN1                    | 0.2494                 | 0.1994–0.2992                       | $\beta$      | [22-26]  |
| CIN3 to CIN2                    | 0.0135                 | $\pm 25\%$                          | $\beta$      | [25]     |
| Infection to CIN2               | 0.0115                 | 0.0034–0.0234                       | $\beta$      | [22-26]  |
| CIN2 to infection/immunity      | 0.1901                 | $\pm 25\%$                          | $\beta$      | [25, 29] |
| CIN1 to CIN3                    | 0.0464                 | 0.0098–0.1297                       | $\beta$      | [22-26]  |
| aCCI to aCC II                  | 0.4377 (0.9/4 years)   | $\pm 25\%$                          | $\beta$      | [28, 30] |
| aCCII to aCC III                | 0.5358 (0.9/3 years)   | $\pm 25\%$                          | $\beta$      | [28, 30] |
| aCC III to aCC IV               | 0.6838 (0.9/2 years)   | $\pm 25\%$                          | $\beta$      | [28, 30] |
| Waning of natural immunity      | 0.021                  | 0.015–0.027                         | $\beta$      | [31]     |
| <b>Cancer symptoms</b>          |                        |                                     |              |          |
| CC FIGO I                       | 0.15                   | $\pm 25\%$                          | $\beta$      | [28, 30] |
| CC FIGO II                      | 0.225                  | $\pm 25\%$                          | $\beta$      | [28, 30] |

|                              |        |               |          |                |
|------------------------------|--------|---------------|----------|----------------|
| CC FIGO III                  | 0.6    | ±25%          | β        | [28, 30]       |
| CC FIGO IV                   | 0.9    | ±25%          | β        | [28, 30]       |
| <b>Vaccine efficacy</b>      |        |               |          |                |
| Vaccine types                | 100%   | 80–100%       | Binomial | Assumed[32-34] |
| Cross-protect (bivalent)     | 0%     | 0–50%         | Binomial | Assumed        |
| <b>Screening sensitivity</b> |        |               |          |                |
| <i>Liquid-based cytology</i> |        |               |          |                |
| CIN1                         | 0.70   | ±25%          | β        | [35]           |
| CIN2/3                       | 0.810  | 0.782–0.835   | β        | [35]           |
| CC FIGO I                    | 0.90   | ±25%          | β        | Assumed        |
| CC FIGO II                   | 0.92   | ±25%          | β        | Assumed        |
| CC FIGO III                  | 0.95   | ±25%          | β        | Assumed        |
| CC FIGO IV                   | 0.99   | ±25%          | β        | Assumed        |
| <i>HPV test</i>              |        |               |          |                |
| CIN1                         | 0.80   | ±25%          | β        | Assumed        |
| CIN2                         | 0.90   | ±25%          | β        | Assumed[33]    |
| CIN3                         | 0.94   | ±25%          | β        | Assumed[33]    |
| CC                           | 1.00   | ..            | ..       | Assumed        |
| <b>Precancer management</b>  |        |               |          |                |
| <i>Urban area</i>            |        |               |          |                |
| Follow-up of CIN1            | 0.4631 | 0.4168–0.5094 | β        | [1]            |
| Directly treatment of CIN1   | 0.4421 | 0.3979–0.4863 | β        | [1]            |
| Treatment of CIN2/3          | 0.9533 | 0.8580–1.0000 | β        | [1]            |
| <i>Rural area</i>            |        |               |          |                |
| Follow-up of CIN1            | 0.3871 | 0.3484–0.4258 | β        | [1]            |
| Directly treatment of CIN1   | 0.4535 | 0.4082–0.4989 | β        | [1]            |
| Treatment of CIN2/3          | 0.8946 | 0.8051–0.9841 | β        | [1]            |
| <b>Treatment efficacy</b>    |        |               |          |                |
| <i>Urban area</i>            |        |               |          |                |
| CIN1                         | 1.0000 | 0.9956–1.0000 | ..       | [1]            |
| CIN2/3                       | 0.9367 | 0.9278–0.9455 | β        | [1]            |

|                                    |          |                  |          |                  |
|------------------------------------|----------|------------------|----------|------------------|
| <b>Rural area</b>                  |          |                  |          |                  |
| CIN1                               | 0.9978   | 0.9943–1.0000    | $\beta$  | [1]              |
| CIN2/3                             | 0.9000   | 0.8846–0.9154    | $\beta$  | [1]              |
| <b>Costs (2020 US\$)</b>           |          |                  |          |                  |
| Bivalent vaccine price             | 4.6      | $\pm 25\%$       | $\gamma$ | See context      |
| 9-valent vaccine price             | 6.6      | $\pm 25\%$       | $\gamma$ | See context      |
| Vaccination service cost           | 3.83     | $\pm 25\%$       | $\gamma$ | [10]             |
| <b>Urban area</b>                  |          |                  |          |                  |
| LBC-based screening                | 9.64     | $\pm 25\%$       | $\gamma$ | [1]              |
| HPV-based screening                | 15.13    | $\pm 25\%$       | $\gamma$ | See context      |
| CIN1 treatment                     | 250.93   | 170.16–280.82    | $\gamma$ | Delphi method[1] |
| CIN2 treatment                     | 1817.77  | 1665.99–1969.55  | $\gamma$ | [17, 21, 36]     |
| CIN3 treatment                     | 2000.16  | 1859.88–2140.44  | $\gamma$ | [17, 21, 36]     |
| CC FIGO I–IIa treatment            | 7974.19  | 7403.87–8544.52  | $\gamma$ | [17, 21, 36]     |
| CC FIGO IIb–IV treatment           | 14051.52 | 12557.9–15545.14 | $\gamma$ | [17, 21, 36]     |
| <b>Rural area</b>                  |          |                  |          |                  |
| LBC-based screening                | 7.00     | $\pm 25\%$       | $\gamma$ | [1]              |
| HPV-based screening                | 12.98    | $\pm 25\%$       | $\gamma$ | See context      |
| CIN1 treatment                     | 177.92   | 143.41–245.08    | $\gamma$ | Delphi method[1] |
| CIN2 treatment                     | 881.99   | 785.05–978.93    | $\gamma$ | [17, 21, 36]     |
| CIN3 treatment                     | 1314.45  | 1171.98–1456.93  | $\gamma$ | [17, 21, 36]     |
| CC FIGO I–IIa treatment            | 5329.05  | 4363.42–6294.69  | $\gamma$ | [17, 21, 36]     |
| CC FIGO IIb–IV treatment           | 8819.70  | 6606.37–11033.02 | $\gamma$ | [17, 21, 36]     |
| <b>Utilities (quality of life)</b> |          |                  |          |                  |
| CIN1 (last for 6 months)           | 0.97     | $\pm 25\%$       | $\beta$  | [37]             |
| CIN2/3 (last for 1 year)           |          |                  |          |                  |
| Pretreatment                       | 0.90     | 0.8734–0.9266    | $\beta$  | [38]             |
| 1 month posttreatment              | 0.96     | 0.9445–0.9755    | $\beta$  | [38]             |
| 3 months posttreatment             | 0.98     | 0.9445–0.9944    | $\beta$  | [38]             |
| 6 months posttreatment             | 0.99     | 0.9856–0.9944    | $\beta$  | [38]             |
| CC FIGO I–IIa                      |          |                  |          |                  |



|                                  |       |               |         |      |
|----------------------------------|-------|---------------|---------|------|
| Pretreatment                     | 0.83  | 0.7875–0.8725 | $\beta$ | [38] |
| 1 month posttreatment            | 0.77  | 0.7232–0.8168 | $\beta$ | [38] |
| 3 months posttreatment           | 0.84  | 0.7975–0.8825 | $\beta$ | [38] |
| 6 months posttreatment           | 0.94  | 0.9145–0.9655 | $\beta$ | [38] |
| CC FIGO IIb–IV                   |       |               |         |      |
| Pretreatment                     | 0.84  | 0.7731–0.9069 | $\beta$ | [38] |
| 1 month posttreatment            | 0.68  | 0.5674–0.7926 | $\beta$ | [38] |
| 3 months posttreatment           | 0.75  | 0.6409–0.8591 | $\beta$ | [38] |
| 6 months posttreatment           | 0.86  | 0.8213–0.8987 | $\beta$ | [38] |
| Terminal care (last for 1 month) | 0.288 | $\pm 25\%$    | $\beta$ | [37] |
| Discount rate                    | 3%    | 0–5%          | ..      | [39] |

Abbreviations: HPV, human papillomavirus; CIN, cervical intraepithelial neoplasia; CC, cervical cancer; aCC, asymptomatic cervical cancer; FIGO, International Federation of Gynecology and Obstetrics; US\$, United States dollar.

### 1.3 Demographic and epidemiological data

We extracted demographic and epidemiological data from open-source publications or government-released online datasets. Population size in 2015 was obtained from National Bureau of Statistics of China (Table S3) [40, 41]. All-cause mortality data was obtained from China Health Statistics Yearbook released by National Health Commission of China (Table S4) [42]. Cervical cancer incidence and mortality data was obtained from Chinese Cancer Registry Report released by National Cancer Center of China (Table S5) [43]. HPV type distributions in women with normal cervical cytology, low grade cervical precancerous lesions, high grade cervical precancerous lesions, and invasive cervical cancer were obtained from the HPV Information Centre (Table S6) [19]. The data sources and analytical methods of HPV prevalence, fertility rate, sexual activity, and screening coverage were reported in our previous study [1].

**Table S3.** Population size in China, 2015

| Age | Urban area |          | Rural area |          |
|-----|------------|----------|------------|----------|
|     | Male       | Female   | Male       | Female   |
| 0–4 | 24661119   | 21473062 | 19907493   | 16878631 |
| 5–9 | 18297966   | 15499146 | 22809169   | 19025832 |

|              |                  |                  |                  |                  |
|--------------|------------------|------------------|------------------|------------------|
| 10–14        | 18240048         | 15352288         | 20298708         | 17151929         |
| 15–19        | 20665163         | 17819613         | 19643732         | 16899875         |
| 20–24        | 32528982         | 30446932         | 19536481         | 17545159         |
| 25–29        | 42135977         | 40344460         | 22665696         | 23055797         |
| 30–34        | 32175622         | 31645970         | 18920693         | 18487365         |
| 35–39        | 31187281         | 30157139         | 18298009         | 17374265         |
| 40–44        | 36211138         | 34455942         | 23775068         | 23006225         |
| 45–49        | 35532960         | 33793282         | 27282109         | 27042701         |
| 50–54        | 29362884         | 27920003         | 23307974         | 23413895         |
| 55–59        | 20848304         | 20193448         | 18207000         | 17565336         |
| 60–64        | 19339854         | 19845980         | 19598163         | 19200916         |
| 65–69        | 13173507         | 13593211         | 14186395         | 13795226         |
| 70–74        | 8542608          | 9146779          | 9245137          | 9315753          |
| 75–79        | 6310468          | 7016699          | 6279698          | 6866380          |
| 80–84        | 3745346          | 4502950          | 3445810          | 4609174          |
| 85+          | 2053949          | 2939919          | 1719489          | 3098719          |
| <b>Total</b> | <b>395013177</b> | <b>376146823</b> | <b>309126823</b> | <b>294333177</b> |

**Table S4.** All-cause mortality (deaths per 100 000 persons) in China, 2015

| Age   | Urban area |        | Rural area |        |
|-------|------------|--------|------------|--------|
|       | Male       | Female | Male       | Female |
| 0     | 482.74     | 391.82 | 427.29     | 339.09 |
| 1–4   | 41.99      | 34.28  | 50.73      | 39.08  |
| 5–9   | 20.42      | 15.09  | 25.59      | 16.08  |
| 10–14 | 24.79      | 16.55  | 33.55      | 18.16  |
| 15–19 | 32.40      | 13.85  | 51.60      | 21.43  |
| 20–24 | 34.06      | 13.82  | 50.62      | 19.57  |
| 25–29 | 62.23      | 27.28  | 98.69      | 38.15  |
| 30–34 | 80.05      | 37.63  | 132.70     | 52.08  |
| 35–39 | 100.74     | 42.32  | 152.27     | 59.62  |
| 40–44 | 196.82     | 82.14  | 242.09     | 95.78  |
| 45–49 | 256.45     | 111.89 | 342.22     | 140.30 |

|              |          |          |          |         |
|--------------|----------|----------|----------|---------|
| 50–54        | 599.41   | 258.35   | 643.88   | 311.47  |
| 55–59        | 671.54   | 279.36   | 729.29   | 336.29  |
| 60–64        | 1296.56  | 624.67   | 1347.40  | 693.03  |
| 65–69        | 2126.89  | 1123.5   | 2388.84  | 1360.54 |
| 70–74        | 3172.67  | 1871.25  | 3670.80  | 2340.54 |
| 75–79        | 5069.34  | 3401.48  | 5781.57  | 3852.60 |
| 80–84        | 9513.94  | 7138.94  | 9483.74  | 6941.25 |
| 85+          | 20754.73 | 17406.88 | 19080.16 | 16185.8 |
| <b>Total</b> | 711.79   | 529.40   | 759.88   | 562.48  |

**Table S5.** Cervical cancer incidence and mortality (per 100 000 women) in China, 2015

| Age          | Incidence  |            | Mortality  |            |
|--------------|------------|------------|------------|------------|
|              | Urban area | Rural area | Urban area | Rural area |
| 0            | 0.16*      | 0          | 0          | 0          |
| 1–4          | 0          | 0          | 0          | 0          |
| 5–9          | 0          | 0          | 0          | 0          |
| 10–14        | 0          | 0          | 0          | 0          |
| 15–19        | 0.05       | 0.07       | 0          | 0          |
| 20–24        | 0.34       | 0.47       | 0.02       | 0.13       |
| 25–29        | 2.77       | 2.99       | 0.39       | 0.62       |
| 30–34        | 7.10       | 6.56       | 0.92       | 1.17       |
| 35–39        | 13.75      | 14.08      | 2.09       | 2.13       |
| 40–44        | 21.78      | 24.15      | 4.28       | 4.25       |
| 45–49        | 31.64      | 35.41      | 7.67       | 7.27       |
| 50–54        | 37.49      | 38.61      | 10.14      | 10.06      |
| 55–59        | 31.24      | 32.27      | 9.34       | 9.78       |
| 60–64        | 26.82      | 32.03      | 8.79       | 10.63      |
| 65–69        | 23.75      | 30.13      | 9.98       | 14.36      |
| 70–74        | 20.62      | 25.80      | 11.08      | 14.72      |
| 75–79        | 17.23      | 23.85      | 12.81      | 18.16      |
| 80–84        | 13.84      | 20.42      | 17.16      | 20.26      |
| 85+          | 10.23      | 12.92      | 17.05      | 14.93      |
| <b>Total</b> | 15.75      | 16.73      | 4.94       | 5.21       |

\*The value in the model simulation is assigned to 0.

**Table S6.** Prevalence (%) and type distribution of HPV infection in China

| Type | Vaccine           | Normal cytology | LSIL             | HSIL             | Invasive cancer  |
|------|-------------------|-----------------|------------------|------------------|------------------|
| 16   | Bivalent/9-valent | 2.6 (2.5–2.8)   | 15.9 (14.8–17.1) | 37.1 (35.8–38.3) | 59.5 (58.3–60.7) |
| 18   | Bivalent/9-valent | 1.1 (1.0–1.2)   | 6.4 (5.6–7.2)    | 7.0 (6.4–7.6)    | 9.6 (8.9–10.4)   |
| 31   | 9-valent          | 0.8 (0.7–0.9)   | 3.5 (3.0–4.2)    | 5.2 (4.7–5.8)    | 2.8 (2.4–3.2)    |
| 33   | 9-valent          | 1.1 (1.0–1.2)   | 6.2 (5.4–7.0)    | 7.0 (6.4–7.6)    | 3.5 (3.0–4.0)    |
| 35   | ..                | 0.2 (0.2–0.3)   | 0.8 (0.5–1.1)    | 0.5 (0.3–0.7)    | 0.6 (0.4–0.9)    |
| 39   | ..                | 0.6 (0.6–0.7)   | 4.9 (4.2–5.7)    | 2.6 (2.2–3.1)    | 1.5 (1.2–1.9)    |
| 45   | 9-valent          | 0.4 (0.3–0.4)   | 0.9 (0.7–1.3)    | 1.7 (1.4–2.1)    | 1.9 (1.4–2.4)    |
| 51   | ..                | 0.5 (0.4–0.5)   | 5.2 (4.6–6.0)    | 3.9 (3.4–4.4)    | 0.4 (0.2–0.8)    |
| 52   | 9-valent          | 2.7 (2.6–2.8)   | 16 (14.8–17.2)   | 17.6 (16.6–18.6) | 6.5 (5.9–7.1)    |
| 56   | ..                | 0.4 (0.4–0.5)   | 4.7 (4.0–5.4)    | 2.1 (1.8–2.6)    | 1.1 (0.8–1.5)    |
| 58   | 9-valent          | 1.7 (1.6–1.8)   | 12.6 (11.6–13.8) | 15.7 (14.8–16.6) | 8.2 (7.6–8.9)    |
| 59   | ..                | 0.4 (0.3–0.4)   | 3.1 (2.6–3.7)    | 2.7 (2.3–3.1)    | 2.6 (2.2–3.1)    |
| 68   | ..                | 0.9 (0.9–1.0)   | 5.3 (4.6–6.1)    | 2.8 (2.4–3.3)    | 1.0 (0.7–1.4)    |

Abbreviations: LSIL, low-grade intraepithelial lesion; HSIL, high-grade intraepithelial lesion.

#### **1.4 Model calibration**

We calibrated the models using a three-stage process by referring epidemiological data of HPV prevalence, cervical incidence and mortality in 2015, HPV type distributions in women with normal cervical cytology, low grade cervical precancerous lesions, high grade cervical precancerous lesions, and invasive cervical cancer. All calibration process was conducted in all population adhering to the status quo status strategy and the assumption that demographic characteristic remained unchanged. Firstly, estimated annual HPV prevalence from dynamic model was calibrated to that from population-based epidemiological study. Secondly, results from calibrated dynamic model were fed into the natural history model to estimate the HPV type-specific cervical cancer incidence. Incidence and HPV type distributions were calibrated by rerunning the model until the mean squared error does not decrease any more. Lastly, estimated cervical cancer mortality was calibrated to data from Chinese Cancer Registry. Model calibration output are shown in the following figures (Figure S2).

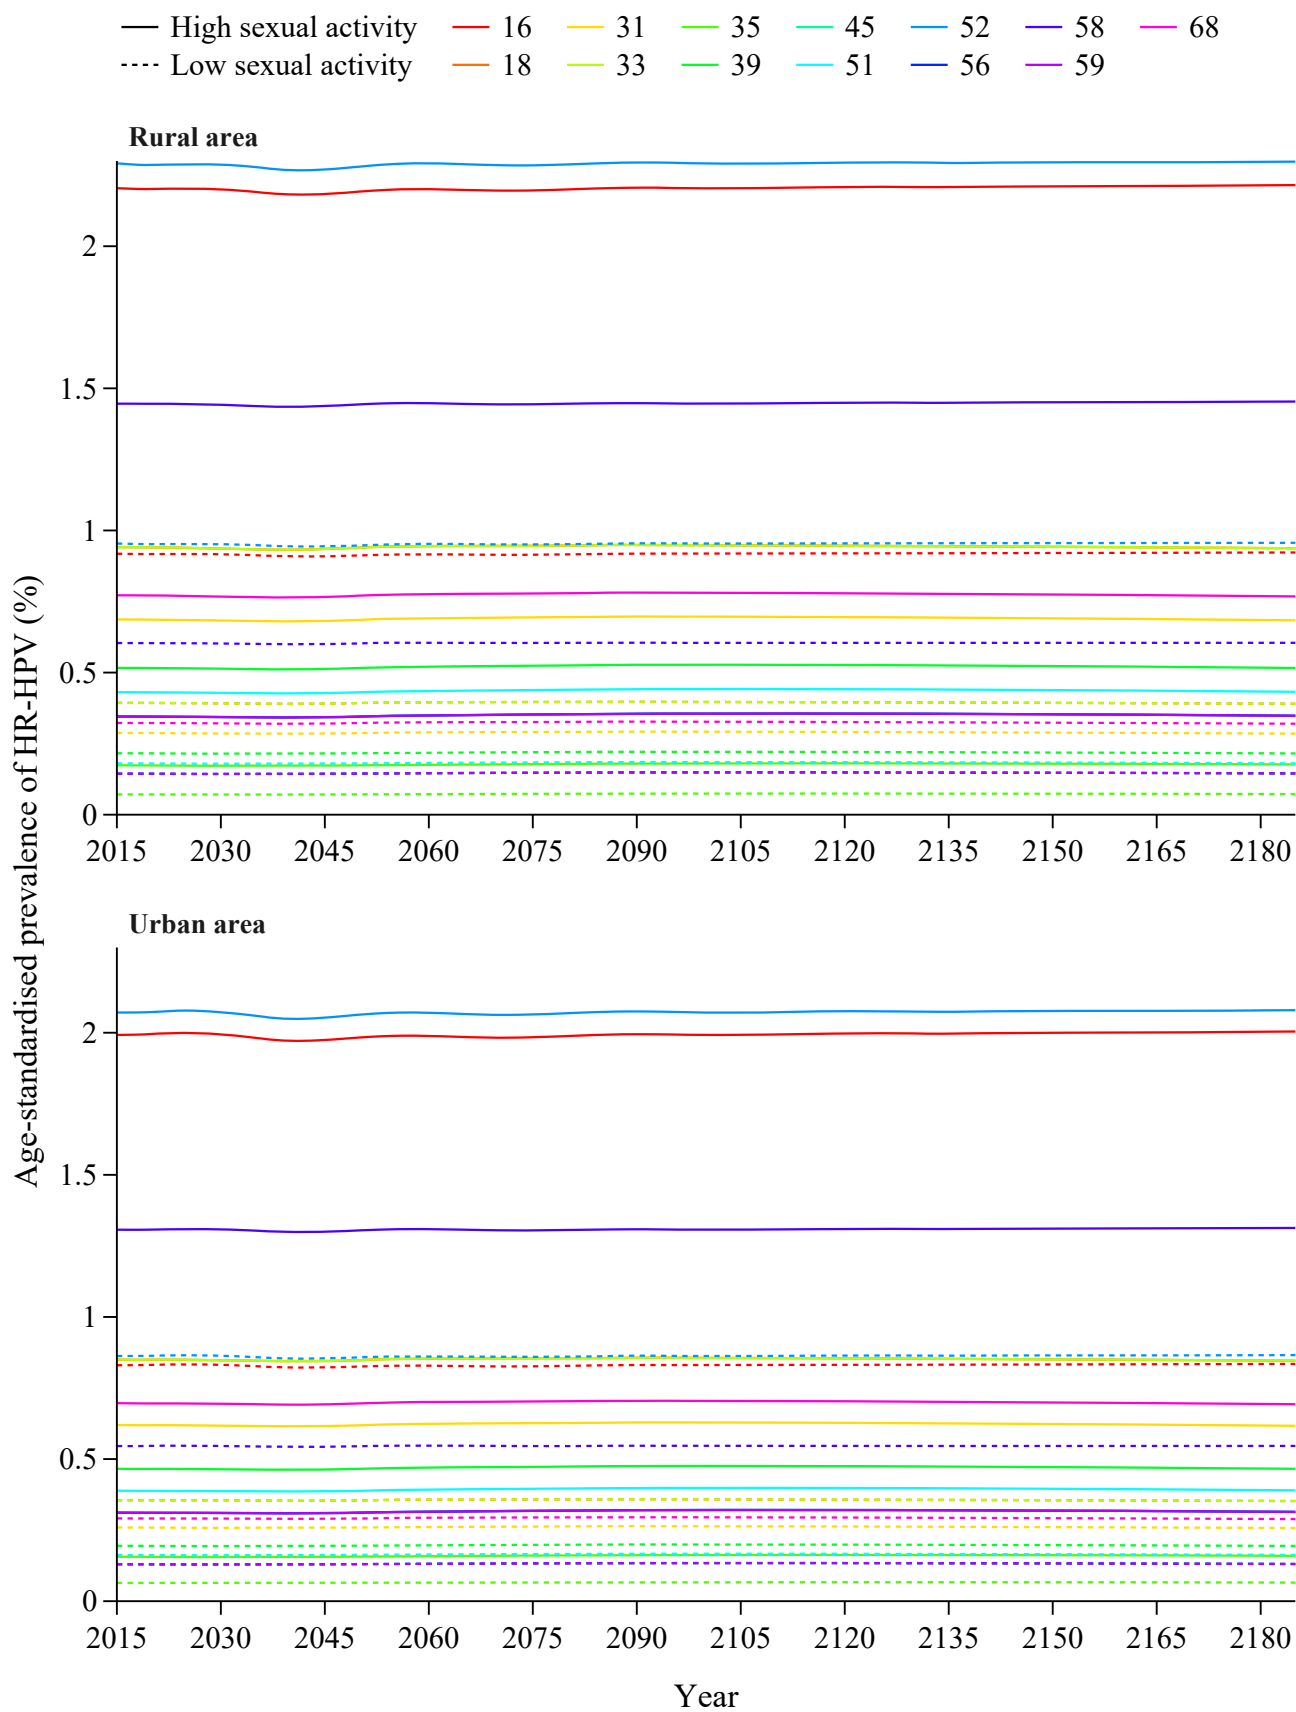

**Figure S2a.** Model calibration output: high-risk HPV prevalence

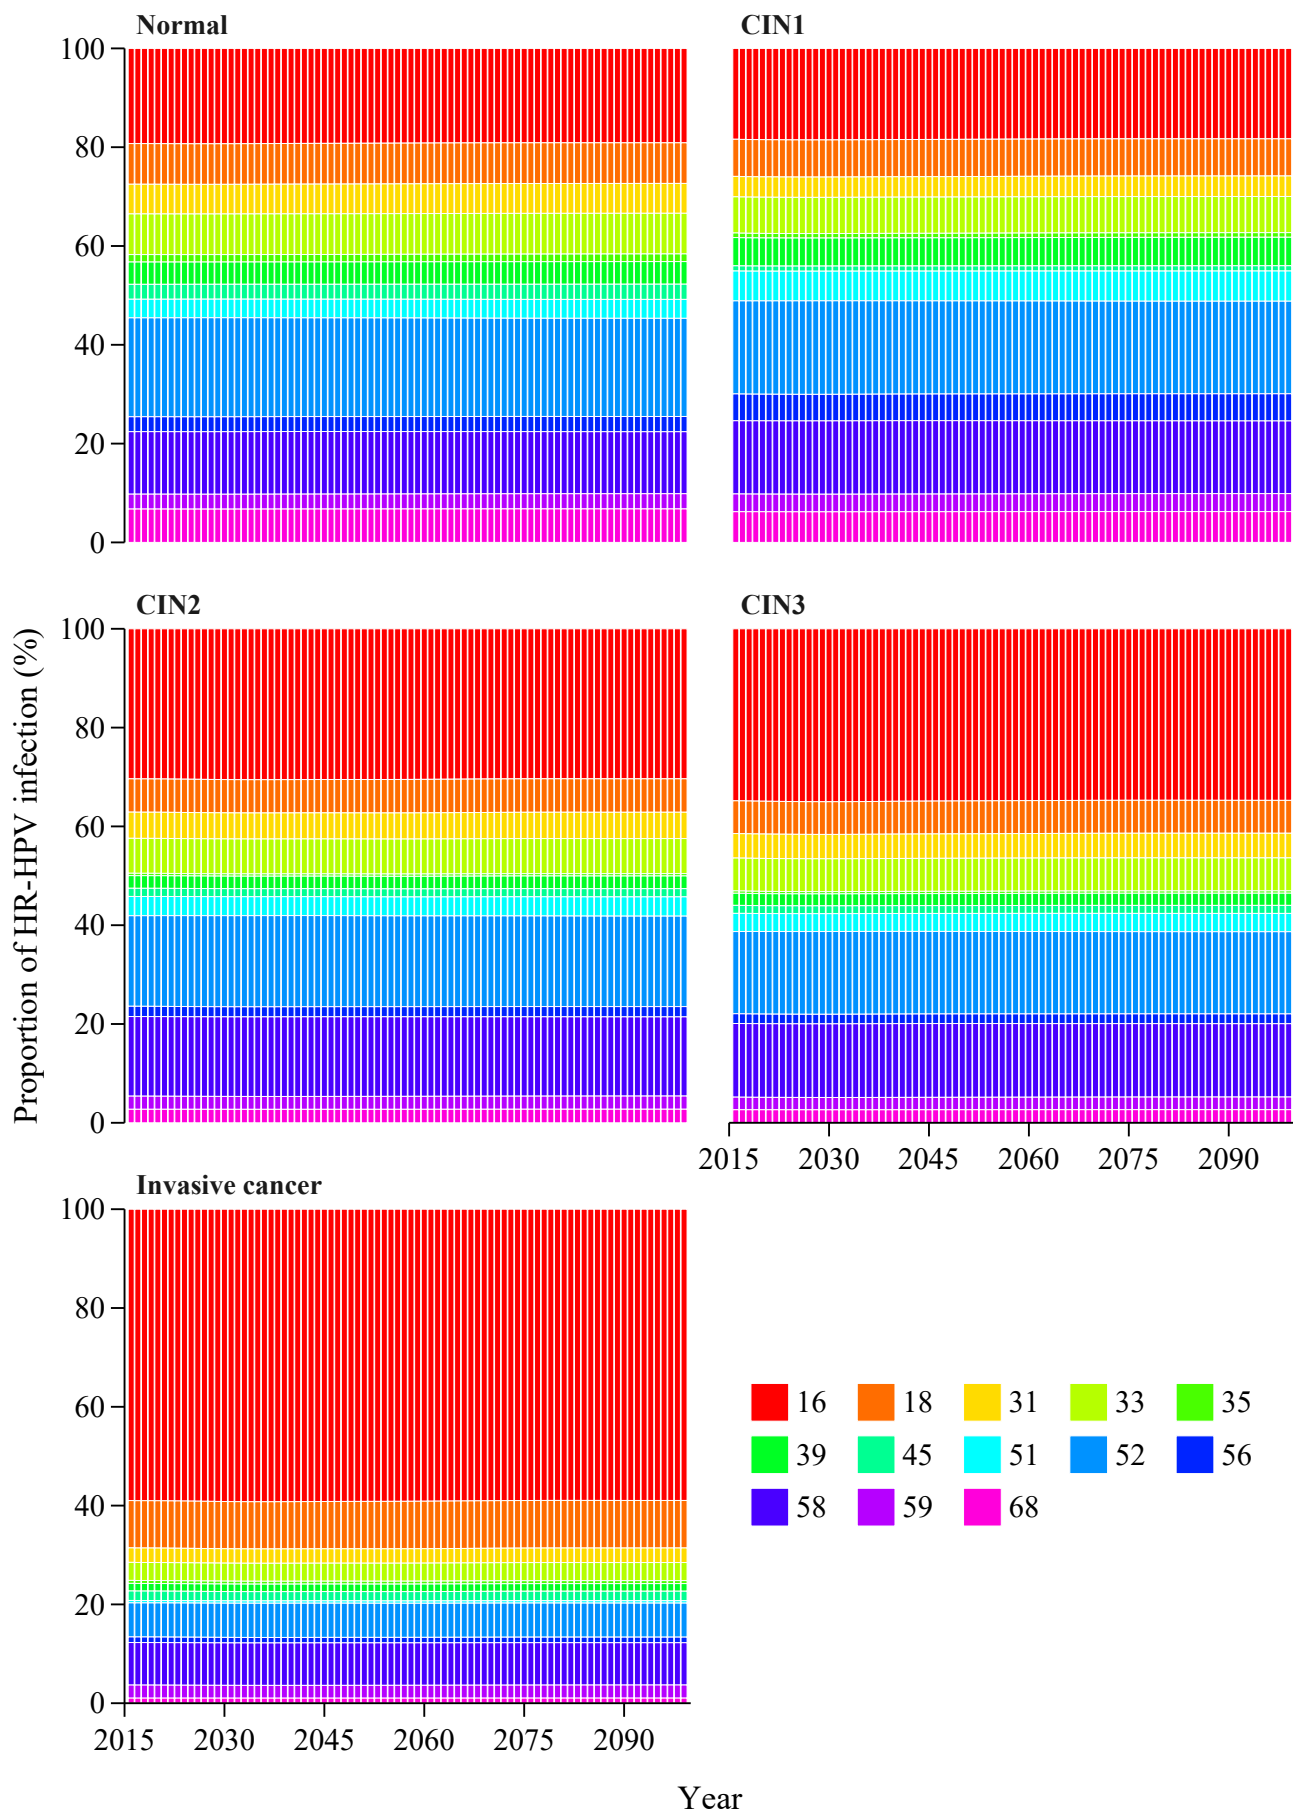

**Figure S2b.** Model calibration output: HPV type distribution

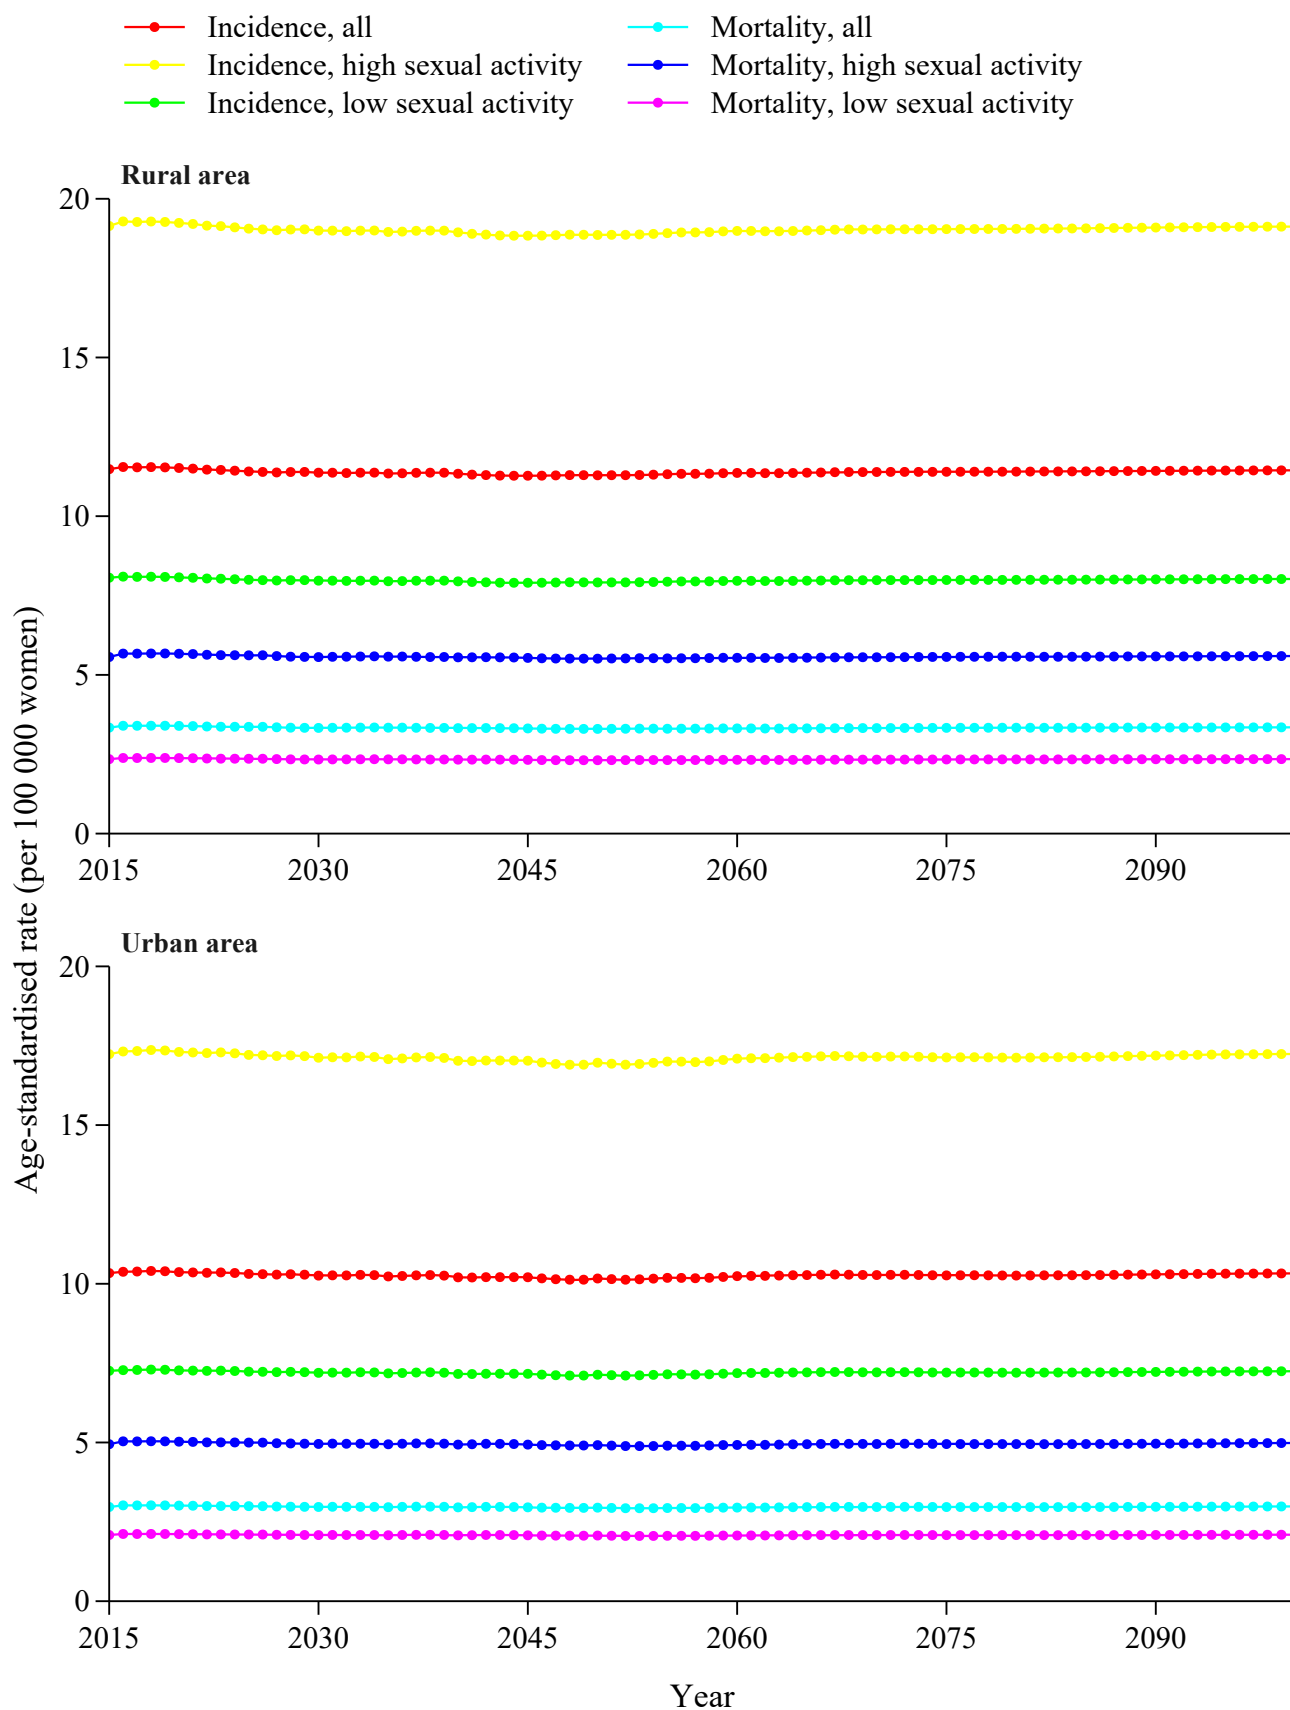

**Figure S2c.** Model calibration output: cervical cancer incidence and mortality

### ***1.5 Strategy selection***

A five-stage analytic process was involved to determine the optimal pathway. Firstly, we evaluated all alternative strategies compared to no intervention in 2021–30 to determine the optimal strategy around HPV vaccination and catch-up vaccination. Secondly, screening strategies for unvaccinated birth cohorts were evaluated and the optimal strategy was then selected. Thirdly and fourthly, we determined the optimal screening strategy for bivalent and 9-valent vaccinated birth cohorts, respectively. Finally, a post-hoc analysis was employed to test whether it was worthwhile to switch from bivalent to 9-valent vaccine in 2031.

The results of five-stage analytic process designed for the selection of optimal pathway were presented at efficiency frontier and incremental cost-effectiveness ratio (ICER) of strategies that lie on the efficiency frontier. Using median income as the ICER threshold, the optimal strategy for routine HPV vaccination, catch-up vaccination, and screening for different birth cohorts were the dominant strategies from a cost-effectiveness perspective.

In stage one analysis in 2021–30, we found that strategy of routine vaccination for 95% of girls aged 9 and catch-up vaccination for girls aged 10–25 is the essential components of the optimal pathway (Figure S3a and Table S7a). However, the optimal screening strategy in 2021–30 (all women are unvaccinated cohorts) either every 3 years or every 5 years need to be determined in stage two analysis for unvaccinated cohorts. Results from stage two analysis for unvaccinated cohorts suggested that screening at 35–64, every 5 year was the optimal strategy when using median income as threshold, while screening at 35–64, every 3 year was the optimal strategy if we use gross domestic product (GDP) per capita as threshold (Figure S3b and Table S7b). In stage three analysis for bivalent vaccinated cohorts, we found that the optimal screening strategy was that screening at 40–55, every 5 years if using median income as threshold, and screening at 35–64, every 5 years if using GDP per capita as threshold (Figure S3c and Table S7c). In stage four analysis for 9-valent vaccinated cohorts, we found that the optimal screening strategy was that screening at 40, 45, and 55 if using median income as threshold, and screening at 40–55, every 5 years if using GDP per capita as threshold (Figure S3d and Table S7d). In stage five post-hoc analysis, discounted ICER for 9-valent vaccine was \$-4077/QALY compared to bivalent vaccine (Table S8).



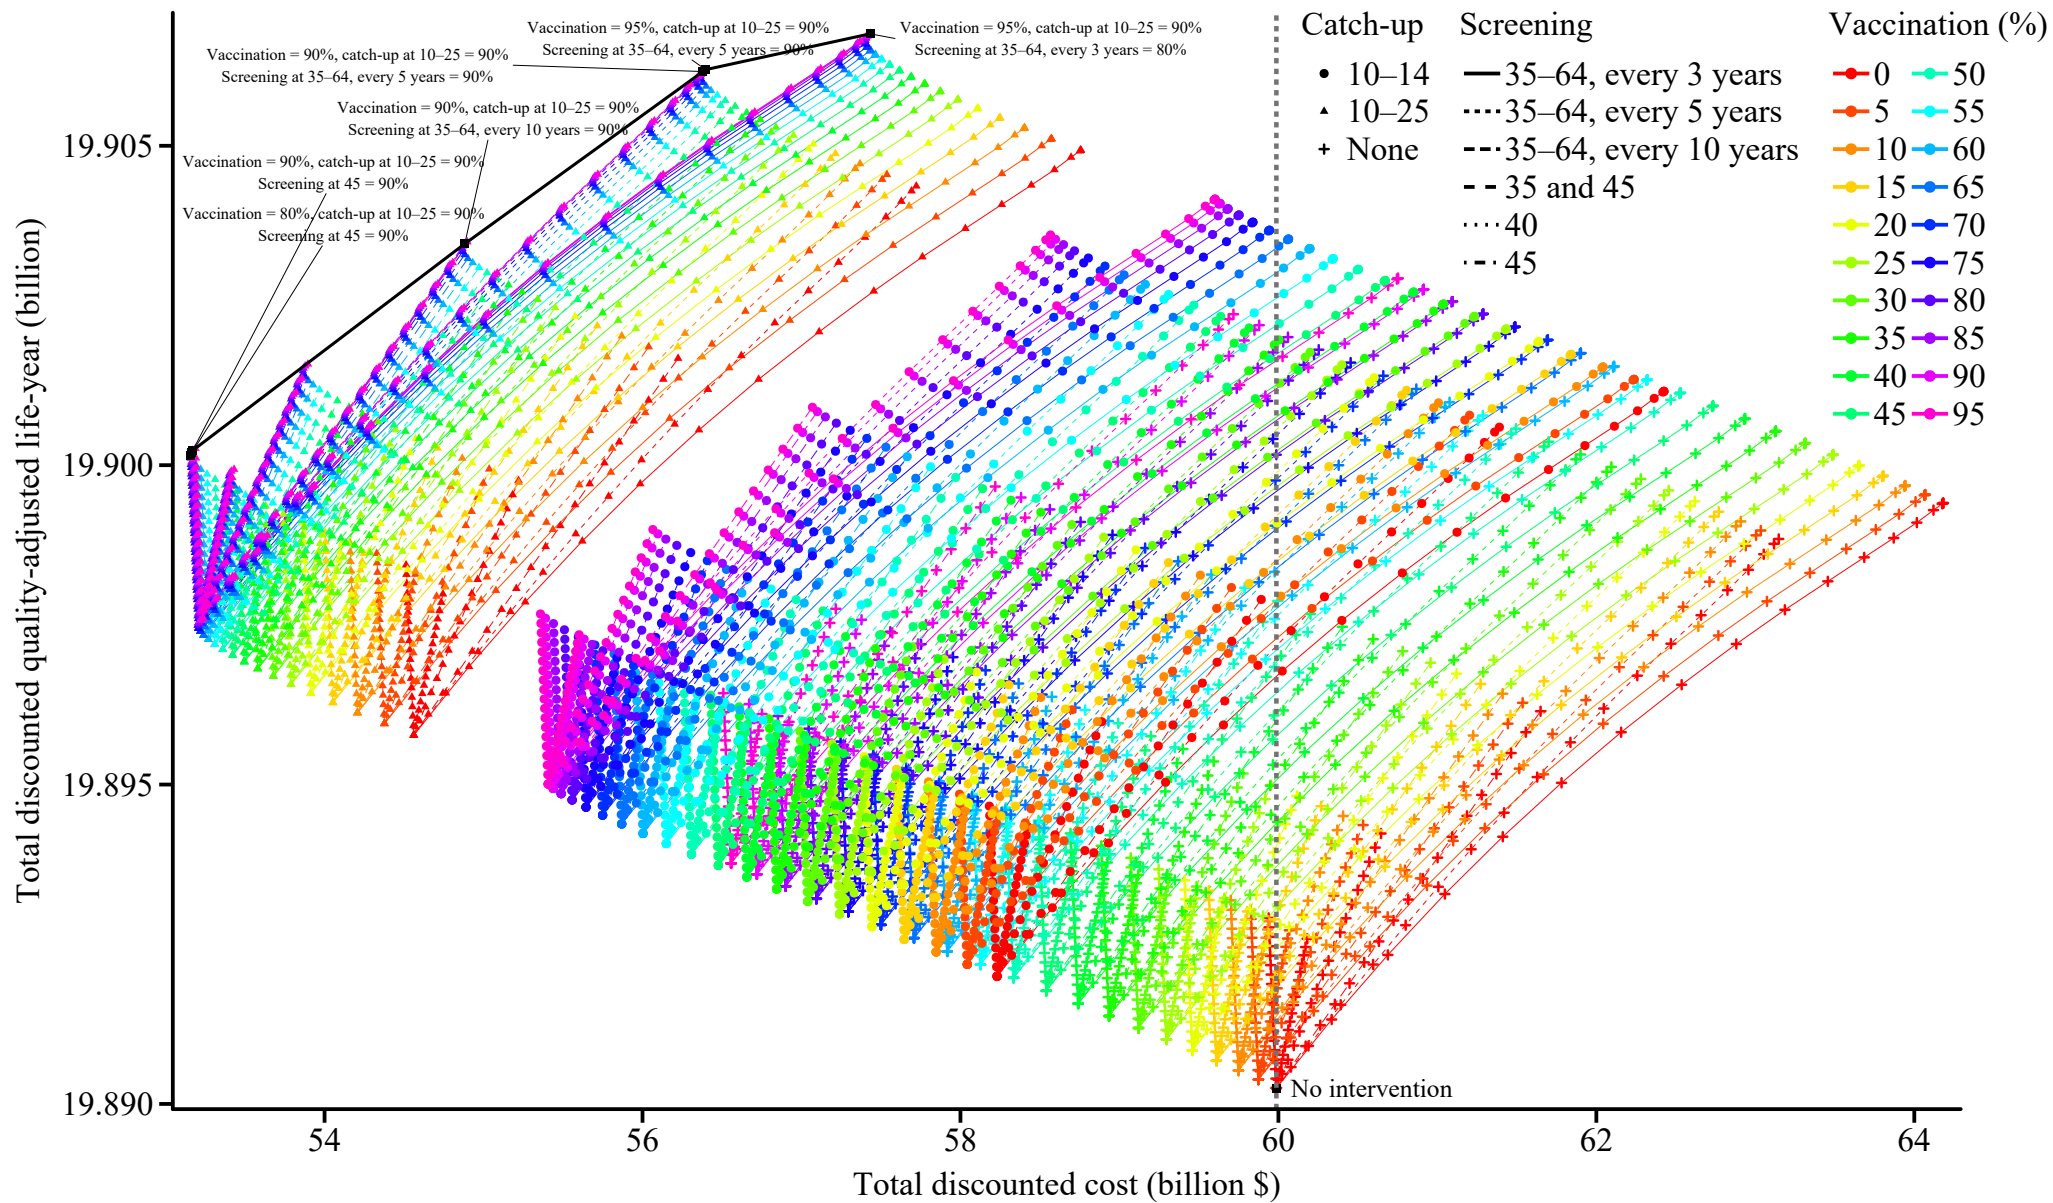

**Figure S3a.** Efficiency frontier of all alternative strategies in 2021–30

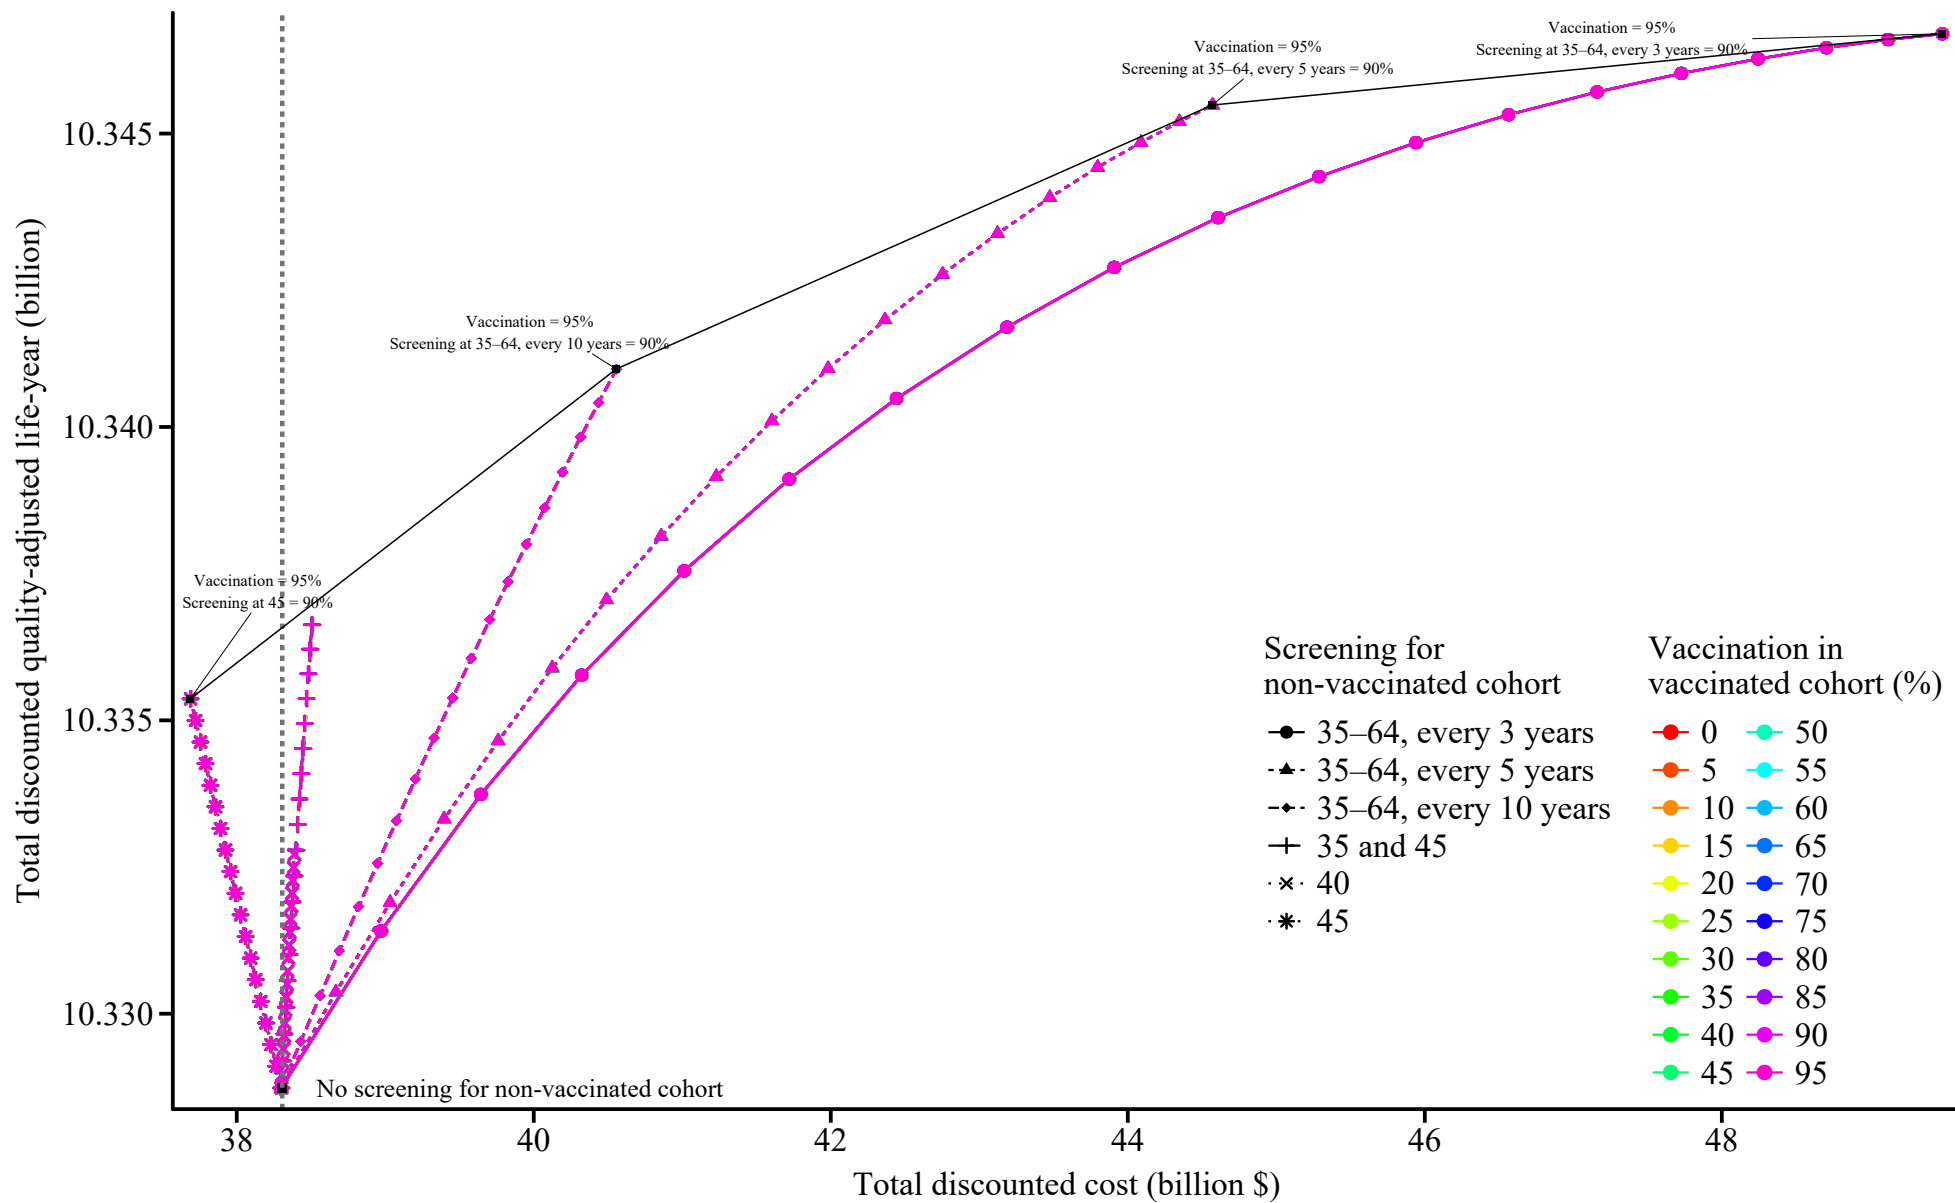

**Figure S3b.** Efficiency frontier of all alternative strategies for non-vaccinated cohort

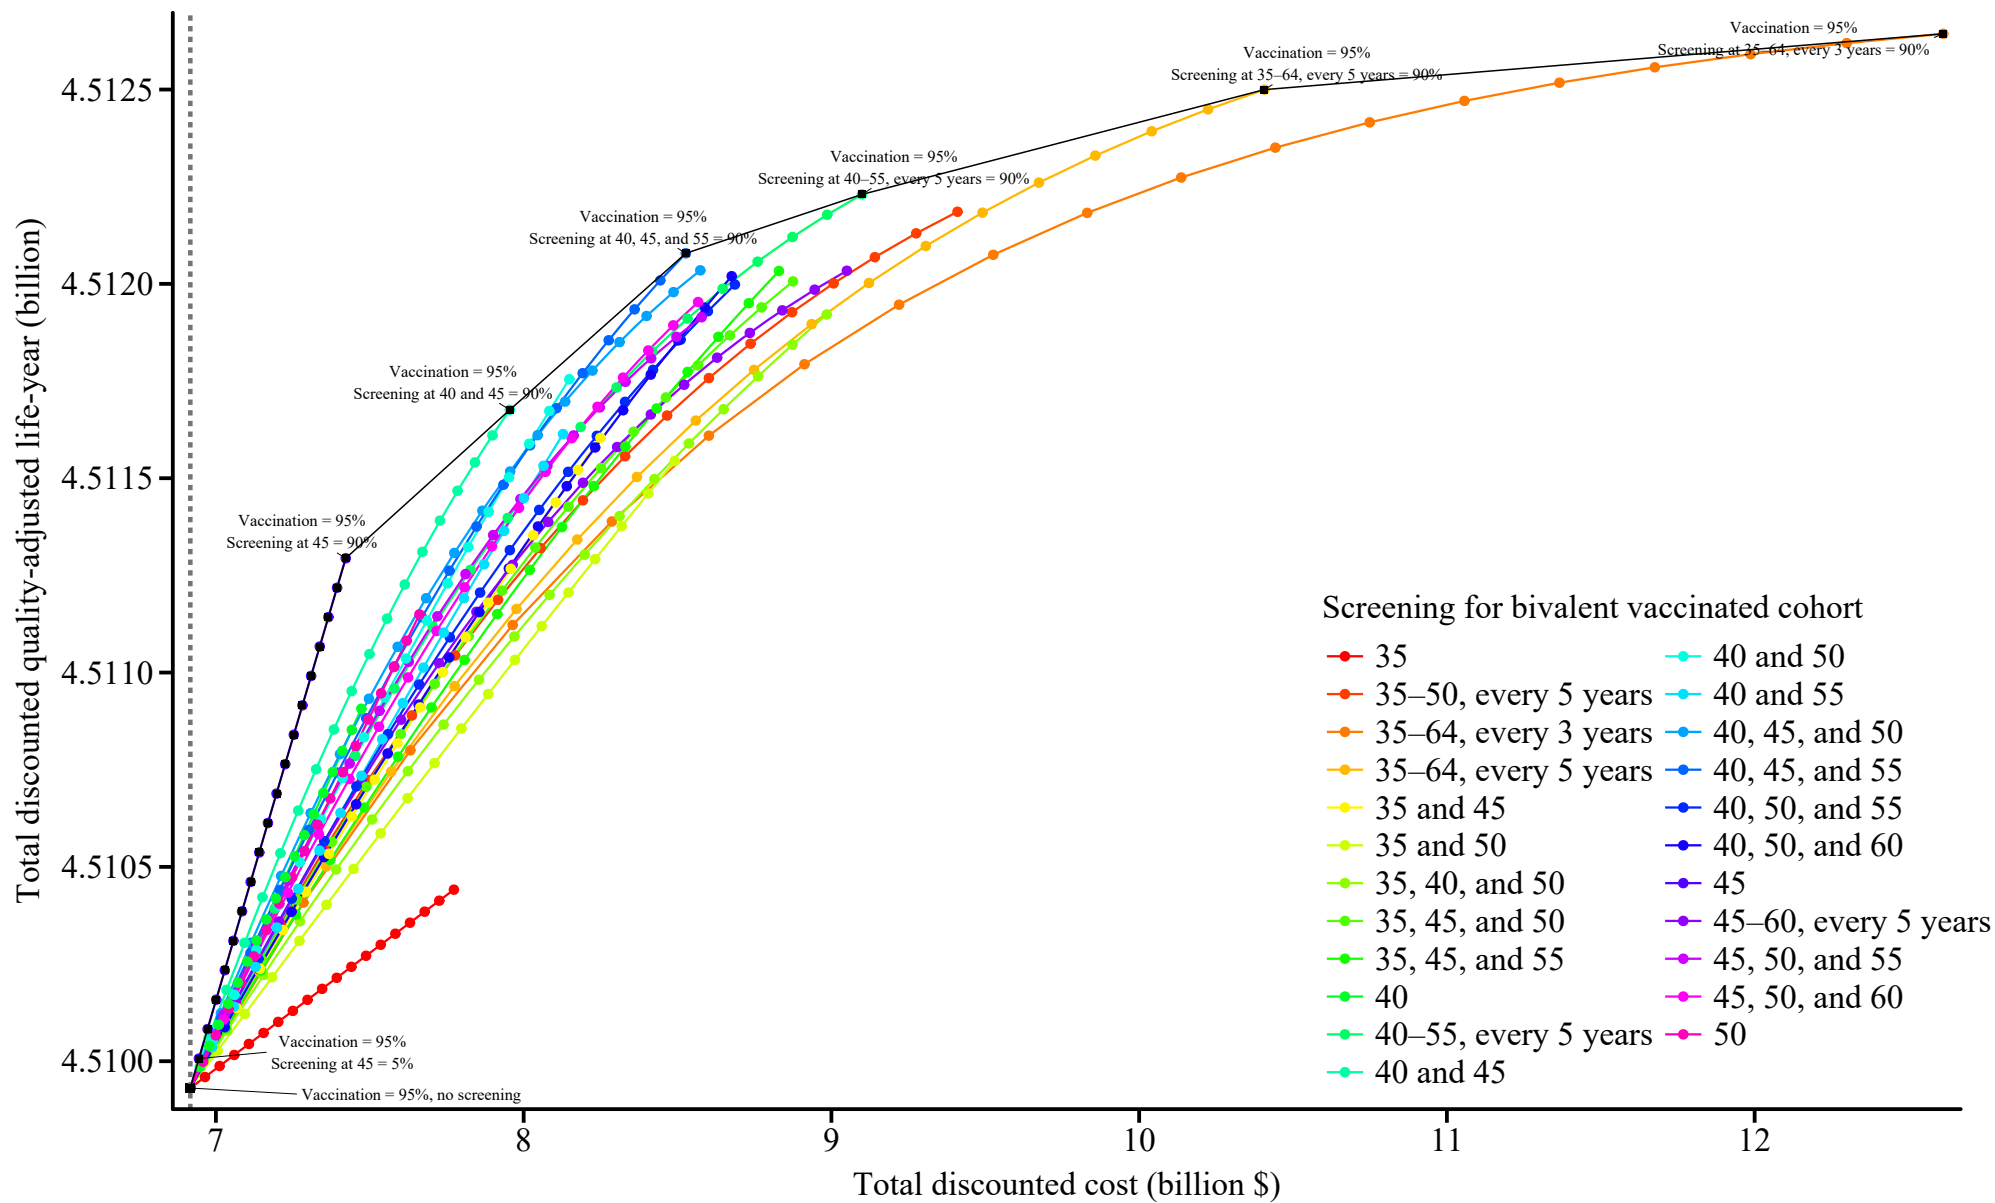

**Figure S3c.** Efficiency frontier of all alternative strategies for bivalent vaccinated cohort

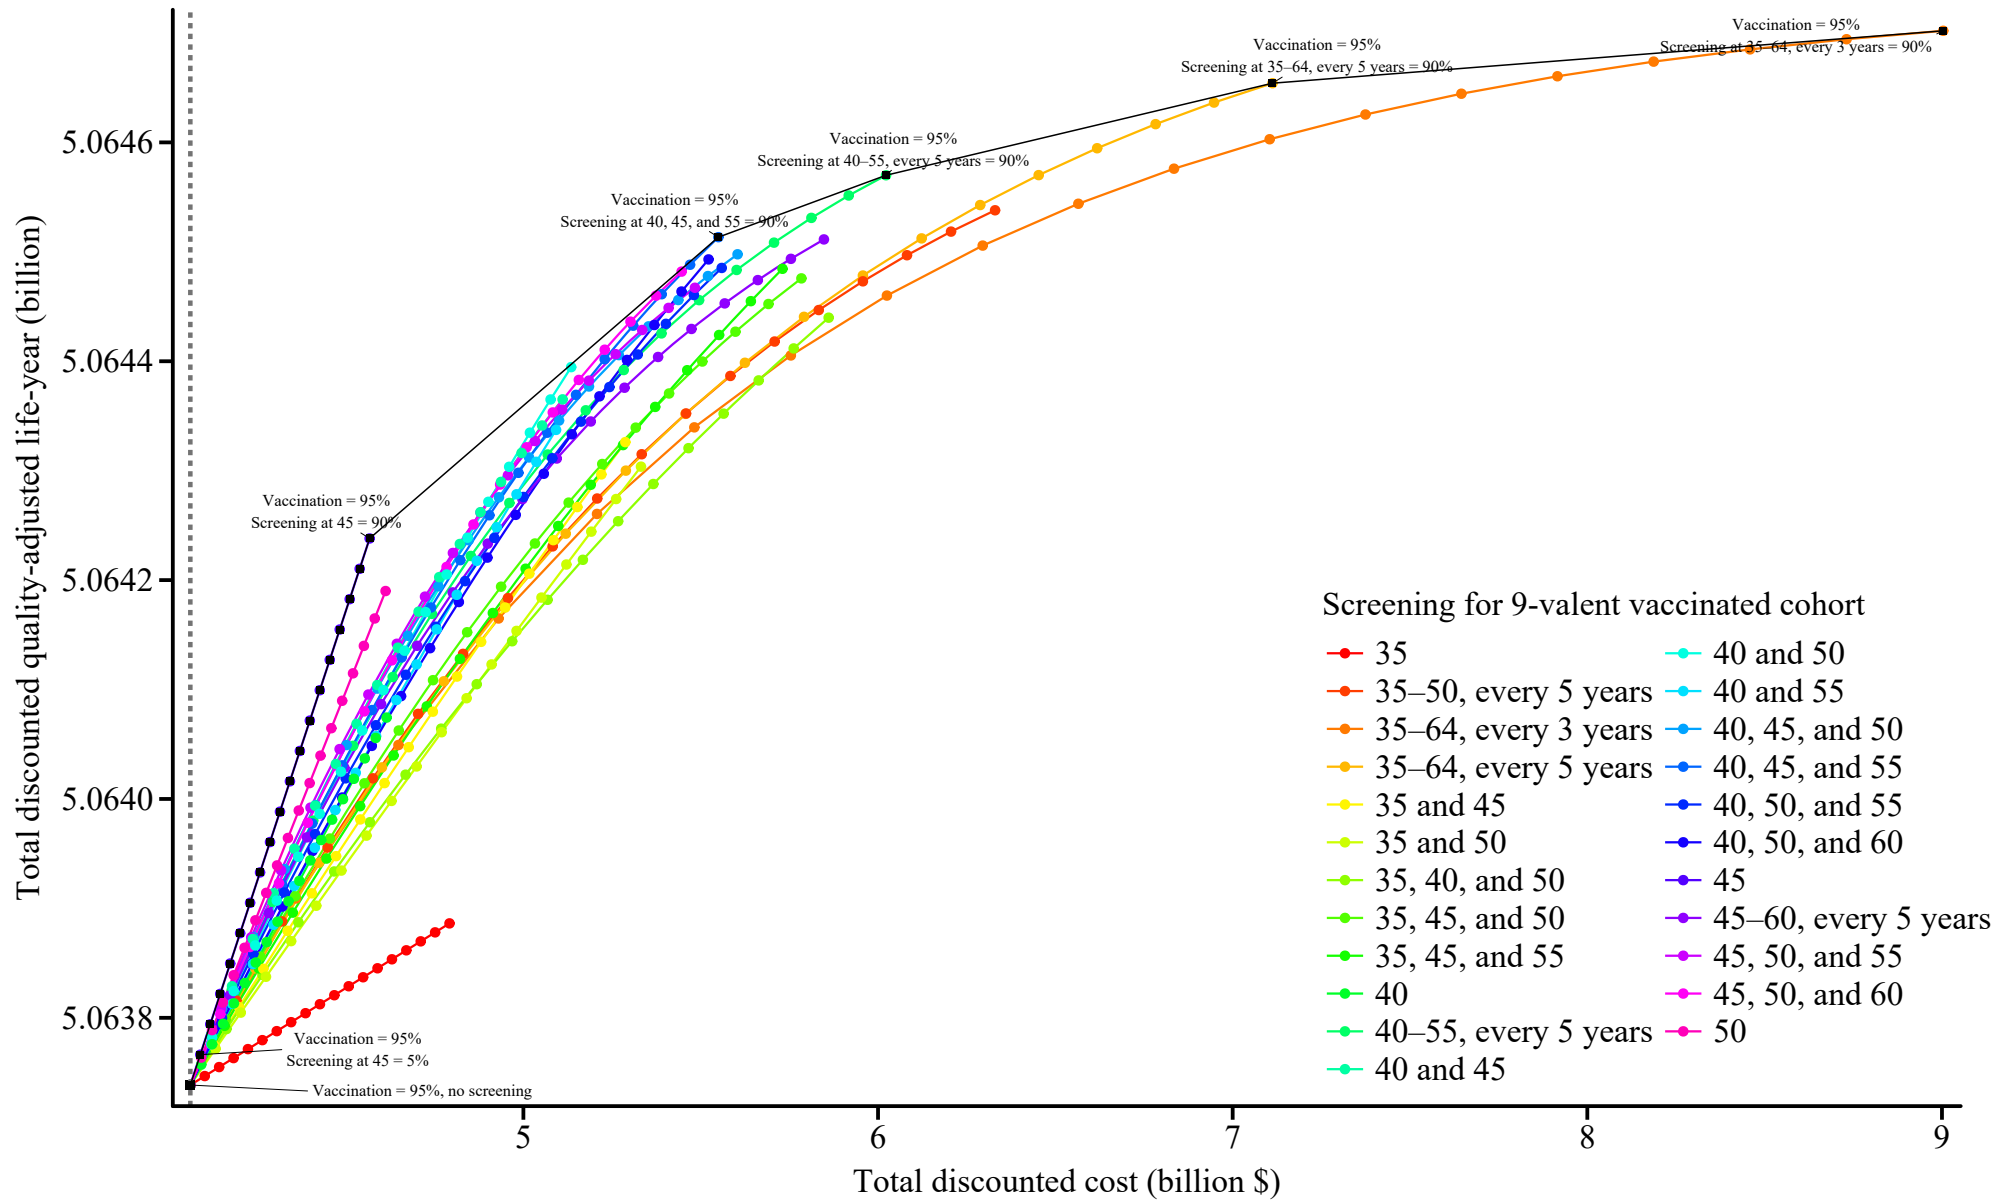

**Figure S3d.** Efficiency frontier of all alternative strategies for 9-valent vaccinated cohort

**Table S7a.** ICER of strategies that lie on the efficiency frontier compared with next-best strategy in 2021–30

| Vaccination coverage (%) | Catch-up age (90%) | Screening             | Screening coverage (%) | Discounted costs | Discounted QALY | Incremental costs | Incremental QALY | ICER |
|--------------------------|--------------------|-----------------------|------------------------|------------------|-----------------|-------------------|------------------|------|
| 80                       | 10–25              | 45                    | 90                     | 53155718108      | 19900157325     | ..                | ..               | ..   |
| 85                       | 10–25              | 45                    | 90                     | 53159978573      | 19900196886     | 4260465           | 39562            | 108  |
| 90                       | 10–25              | 45                    | 90                     | 53170937661      | 19900231154     | 10959087          | 34267            | 320  |
| 90                       | 10–25              | 35–64, every 10 years | 90                     | 54881858960      | 19903465960     | 1710921299        | 3234807          | 529  |
| 90                       | 10–25              | 35–64, every 5 years  | 90                     | 56380415355      | 19906162723     | 1498556395        | 2696763          | 556  |
| 95                       | 10–25              | 35–64, every 5 years  | 90                     | 56397275977      | 19906192323     | 16860621          | 29600            | 570  |
| 95                       | 10–25              | 35–64, every 3 years  | 76                     | 57432238321      | 19906753315     | 1034962344        | 560991           | 1845 |

**Table S7b.** ICER of strategies that lie on the efficiency frontier compared with next-best strategy for non-vaccinated cohort

| Vaccination coverage (%) | Screening             | Screening coverage (%) | Discounted costs | Discounted QALY | Incremental costs | Incremental QALY | ICER |
|--------------------------|-----------------------|------------------------|------------------|-----------------|-------------------|------------------|------|
| 95                       | 45                    | 90                     | 37687590520      | 10335366353     | ..                | ..               | ..   |
| 95                       | 35–64, every 10 years | 90                     | 40555058508      | 10340986941     | 2867467988        | 5620589          | 510  |
| 95                       | 35–64, every 5 years  | 90                     | 44569531623      | 10345485857     | 4014473115        | 4498915          | 892  |
| 95                       | 35–64, every 3 years  | 90                     | 49483675968      | 10346700340     | 4914144344        | 1214483          | 4046 |

**Table S7c.** ICER of strategies that lie on the efficiency frontier compared with next-best strategy for bivalent vaccinated cohort

| Vaccination coverage (%) | Screening            | Screening coverage (%) | Discounted Costs | Discounted QALY | Incremental costs | Incremental QALY | ICER  |
|--------------------------|----------------------|------------------------|------------------|-----------------|-------------------|------------------|-------|
| 95                       | ..                   | 0                      | 6916918430       | 4509930957      | ..                | ..               | ..    |
| 95                       | 45                   | 5                      | 6944874679       | 4510006753      | 27956250          | 75795            | 369   |
| 95                       | 45                   | 10                     | 6972841834       | 4510082539      | 27967154          | 75787            | 369   |
| 95                       | 45                   | 15                     | 7000819890       | 4510158317      | 27978056          | 75778            | 369   |
| 95                       | 45                   | 20                     | 7028808844       | 4510234087      | 27988954          | 75769            | 369   |
| 95                       | 45                   | 25                     | 7056808693       | 4510309847      | 27999850          | 75761            | 370   |
| 95                       | 45                   | 30                     | 7084819435       | 4510385599      | 28010742          | 75752            | 370   |
| 95                       | 45                   | 35                     | 7112841066       | 4510461343      | 28021631          | 75743            | 370   |
| 95                       | 45                   | 40                     | 7140873583       | 4510537077      | 28032517          | 75735            | 370   |
| 95                       | 45                   | 45                     | 7168916984       | 4510612803      | 28043400          | 75726            | 370   |
| 95                       | 45                   | 50                     | 7196971264       | 4510688520      | 28054280          | 75717            | 371   |
| 95                       | 45                   | 55                     | 7225036421       | 4510764229      | 28065157          | 75709            | 371   |
| 95                       | 45                   | 60                     | 7253112453       | 4510839929      | 28076031          | 75700            | 371   |
| 95                       | 45                   | 65                     | 7281199355       | 4510915620      | 28086902          | 75691            | 371   |
| 95                       | 45                   | 70                     | 7309297125       | 4510991303      | 28097770          | 75683            | 371   |
| 95                       | 45                   | 75                     | 7337405759       | 4511066976      | 28108635          | 75674            | 371   |
| 95                       | 45                   | 80                     | 7365525256       | 4511142642      | 28119496          | 75665            | 372   |
| 95                       | 45                   | 85                     | 7393655611       | 4511218298      | 28130355          | 75657            | 372   |
| 95                       | 45                   | 90                     | 7421796822       | 4511293946      | 28141211          | 75648            | 372   |
| 95                       | 40 and 45            | 90                     | 7954942707       | 4511675925      | 533145885         | 381979           | 1396  |
| 95                       | 40, 45, and 55       | 90                     | 8526952961       | 4512078642      | 572010254         | 402717           | 1420  |
| 95                       | 40–55, every 5 years | 90                     | 9099286240       | 4512230108      | 572333279         | 151466           | 3779  |
| 95                       | 35–64, every 5 years | 90                     | 10407014645      | 4512499772      | 1307728405        | 269664           | 4849  |
| 95                       | 35–64, every 3 years | 90                     | 12612797057      | 4512643389      | 2205782412        | 143617           | 15359 |

**Table S7d.** ICER of strategies that lie on the efficiency frontier compared with next-best strategy for 9-valent vaccinated cohort

| Vaccination coverage (%) | Screening            | Screening coverage (%) | Discounted Costs | Discounted QALY | Incremental costs | Incremental QALY | ICER  |
|--------------------------|----------------------|------------------------|------------------|-----------------|-------------------|------------------|-------|
| 95                       | ..                   | 0                      | 4060881751       | 5063738567      | ..                | ..               | ..    |
| 95                       | 45                   | 5                      | 4088951052       | 5063766330      | 28069301          | 27763            | 1011  |
| 95                       | 45                   | 10                     | 4117022300       | 5063794092      | 28071248          | 27762            | 1011  |
| 95                       | 45                   | 15                     | 4145095494       | 5063821852      | 28073194          | 27760            | 1011  |
| 95                       | 45                   | 20                     | 4173170635       | 5063849610      | 28075141          | 27758            | 1011  |
| 95                       | 45                   | 25                     | 4201247722       | 5063877367      | 28077087          | 27757            | 1012  |
| 95                       | 45                   | 30                     | 4229326754       | 5063905122      | 28079032          | 27755            | 1012  |
| 95                       | 45                   | 35                     | 4257407732       | 5063932876      | 28080978          | 27754            | 1012  |
| 95                       | 45                   | 40                     | 4285490654       | 5063960628      | 28082923          | 27752            | 1012  |
| 95                       | 45                   | 45                     | 4313575522       | 5063988379      | 28084868          | 27751            | 1012  |
| 95                       | 45                   | 50                     | 4341662334       | 5064016128      | 28086812          | 27749            | 1012  |
| 95                       | 45                   | 55                     | 4369751091       | 5064043875      | 28088756          | 27747            | 1012  |
| 95                       | 45                   | 60                     | 4397841791       | 5064071621      | 28090700          | 27746            | 1012  |
| 95                       | 45                   | 65                     | 4425934435       | 5064099365      | 28092644          | 27744            | 1013  |
| 95                       | 45                   | 70                     | 4454029023       | 5064127108      | 28094588          | 27743            | 1013  |
| 95                       | 45                   | 75                     | 4482125554       | 5064154849      | 28096531          | 27741            | 1013  |
| 95                       | 45                   | 80                     | 4510224028       | 5064182589      | 28098474          | 27740            | 1013  |
| 95                       | 45                   | 85                     | 4538324444       | 5064210327      | 28100416          | 27738            | 1013  |
| 95                       | 45                   | 90                     | 4566426803       | 5064238063      | 28102359          | 27736            | 1013  |
| 95                       | 40, 45, and 55       | 90                     | 5549846986       | 5064513384      | 983420183         | 275320           | 3572  |
| 95                       | 40–55, every 5 years | 90                     | 6022514112       | 5064569953      | 472667125         | 56570            | 8355  |
| 95                       | 35–64, every 5 years | 90                     | 7112255101       | 5064654081      | 1089740990        | 84127            | 12953 |
| 95                       | 35–64, every 3 years | 90                     | 9003550274       | 5064701973      | 1891295172        | 47892            | 39490 |



**Table S8.** ICERs of switch 9-valent vaccination from 2031 onwards compared to continuing bivalent vaccination\*

| Vaccination from<br>2031 onwards | 0% discount rate          |                        |                 | 3% discount rate          |                        |                 |
|----------------------------------|---------------------------|------------------------|-----------------|---------------------------|------------------------|-----------------|
|                                  | Total costs<br>million \$ | Total QALYs<br>million | ICER<br>\$/QALY | Total costs<br>million \$ | Total QALYs<br>million | ICER<br>\$/QALY |
| <b>China</b>                     |                           |                        |                 |                           |                        |                 |
| Bivalent                         | 165 285                   | 62 164                 | ..              | 61 925                    | 19 922                 | ..              |
| 9-valent                         | 135 523                   | 62 177                 | -2468           | 59 222                    | 19 922                 | -4077           |
| <b>Urban area</b>                |                           |                        |                 |                           |                        |                 |
| Bivalent                         | 132 999                   | 46 291                 | ..              | 49 481                    | 14 700                 | ..              |
| 9-valent                         | 108 875                   | 46 299                 | -2748           | 47 250                    | 14 701                 | -4519           |
| <b>Rural area</b>                |                           |                        |                 |                           |                        |                 |
| Bivalent                         | 32 286                    | 15 874                 | ..              | 12 444                    | 5222                   | ..              |
| 9-valent                         | 26 648                    | 15 877                 | -1719           | 11 972                    | 5222                   | -2788           |

ICERs, incremental cost-effectiveness ratios; QALY, quality-adjusted life-year.

\* Components may not sum to totals due to rounding.

## **2. Results**

### ***2.1 Sensitivity analysis***

Probabilistic sensitivity analyses are displayed in a scatter plot for all discounted/undiscounted incremental costs and quality-adjusted life-years (QALYs) (Figure S4). Each black point on the graph represents one of the incremental costs and the corresponding benefits out of the 1000 simulations.

Univariate sensitivity analyses are displayed in a tornado diagram for all model parameters (Figure S5). In this diagram, each bar represents the impact of uncertainty in an individual variable on the ICER.

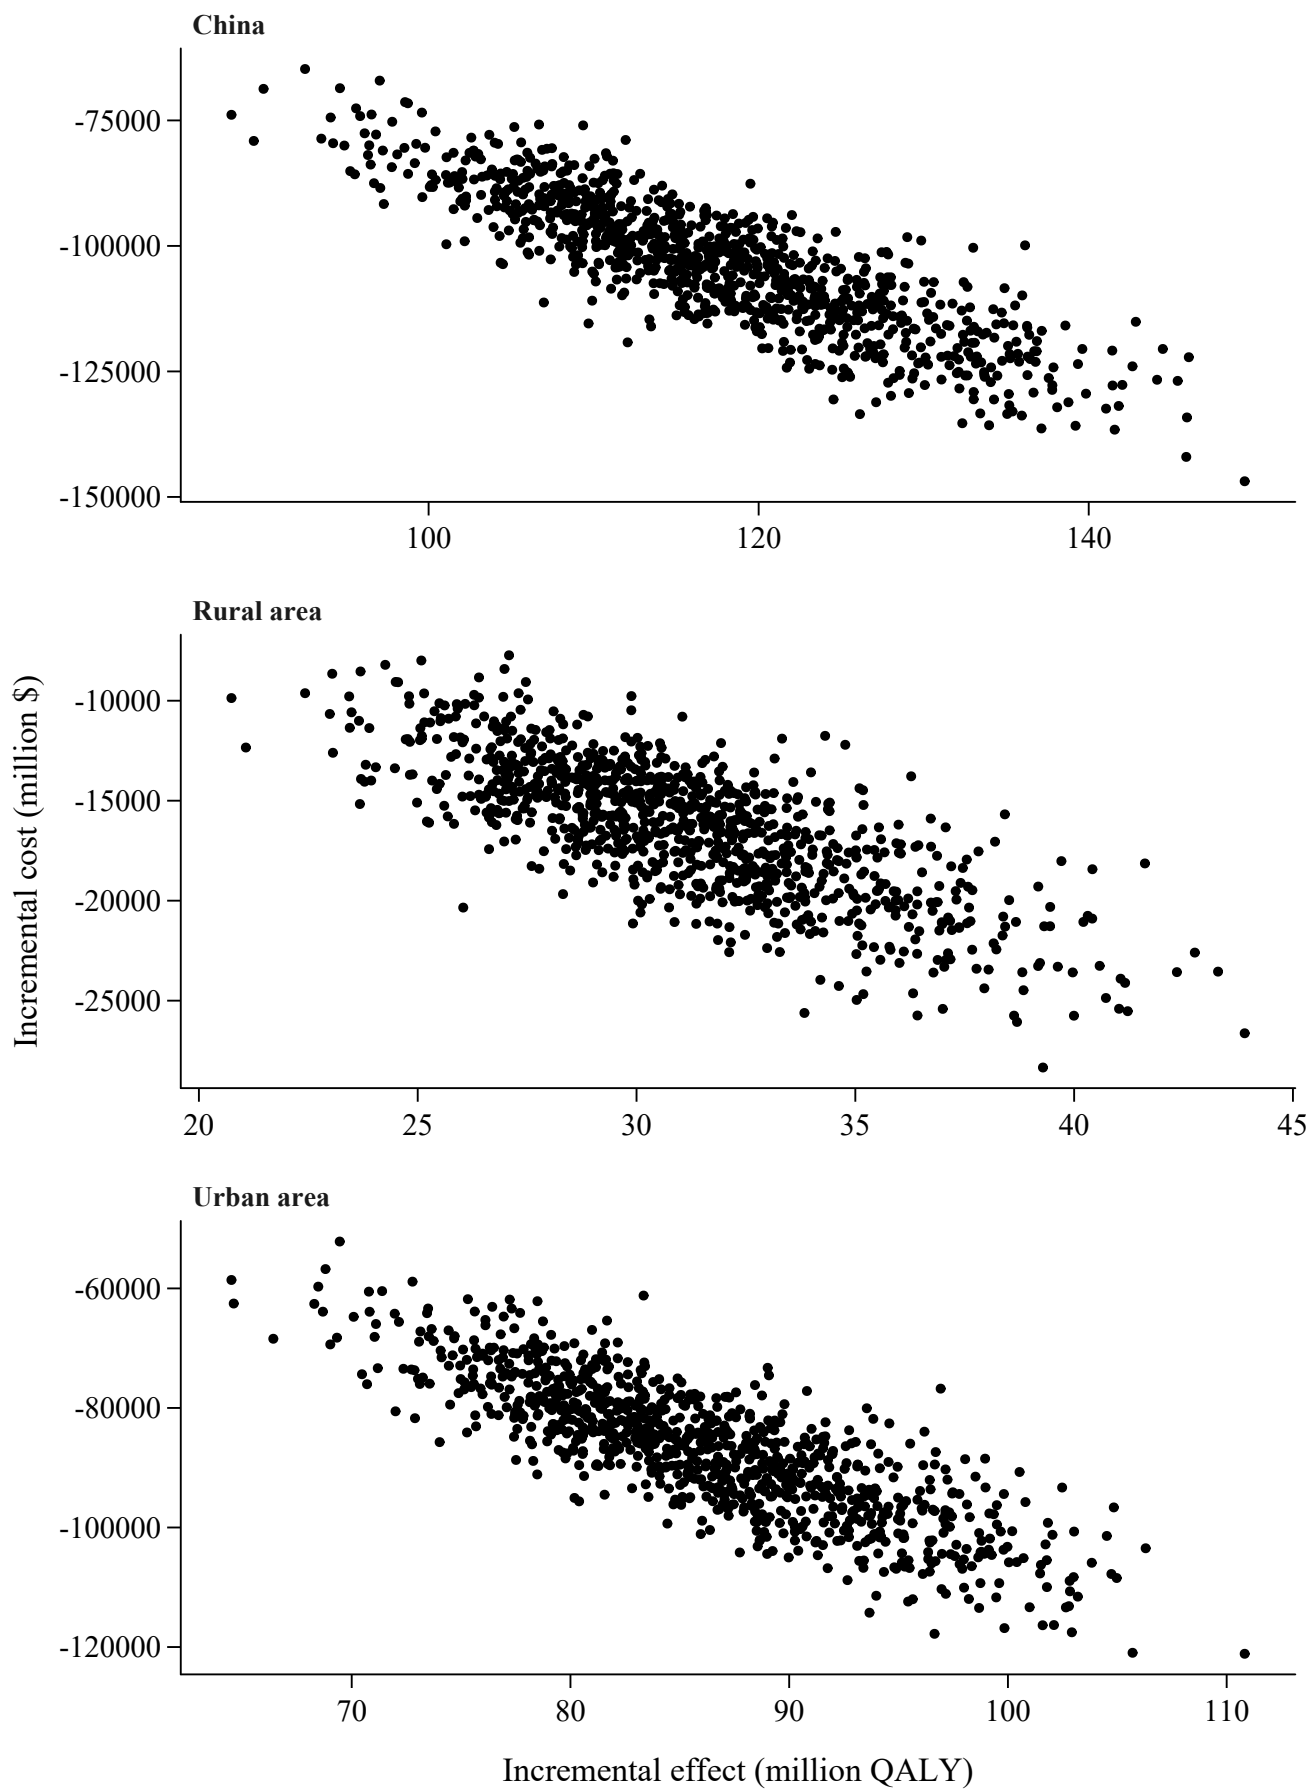

**Figure S4a.** Probabilistic sensitivity analyses for optimal pathway vs. status quo (0% discount)

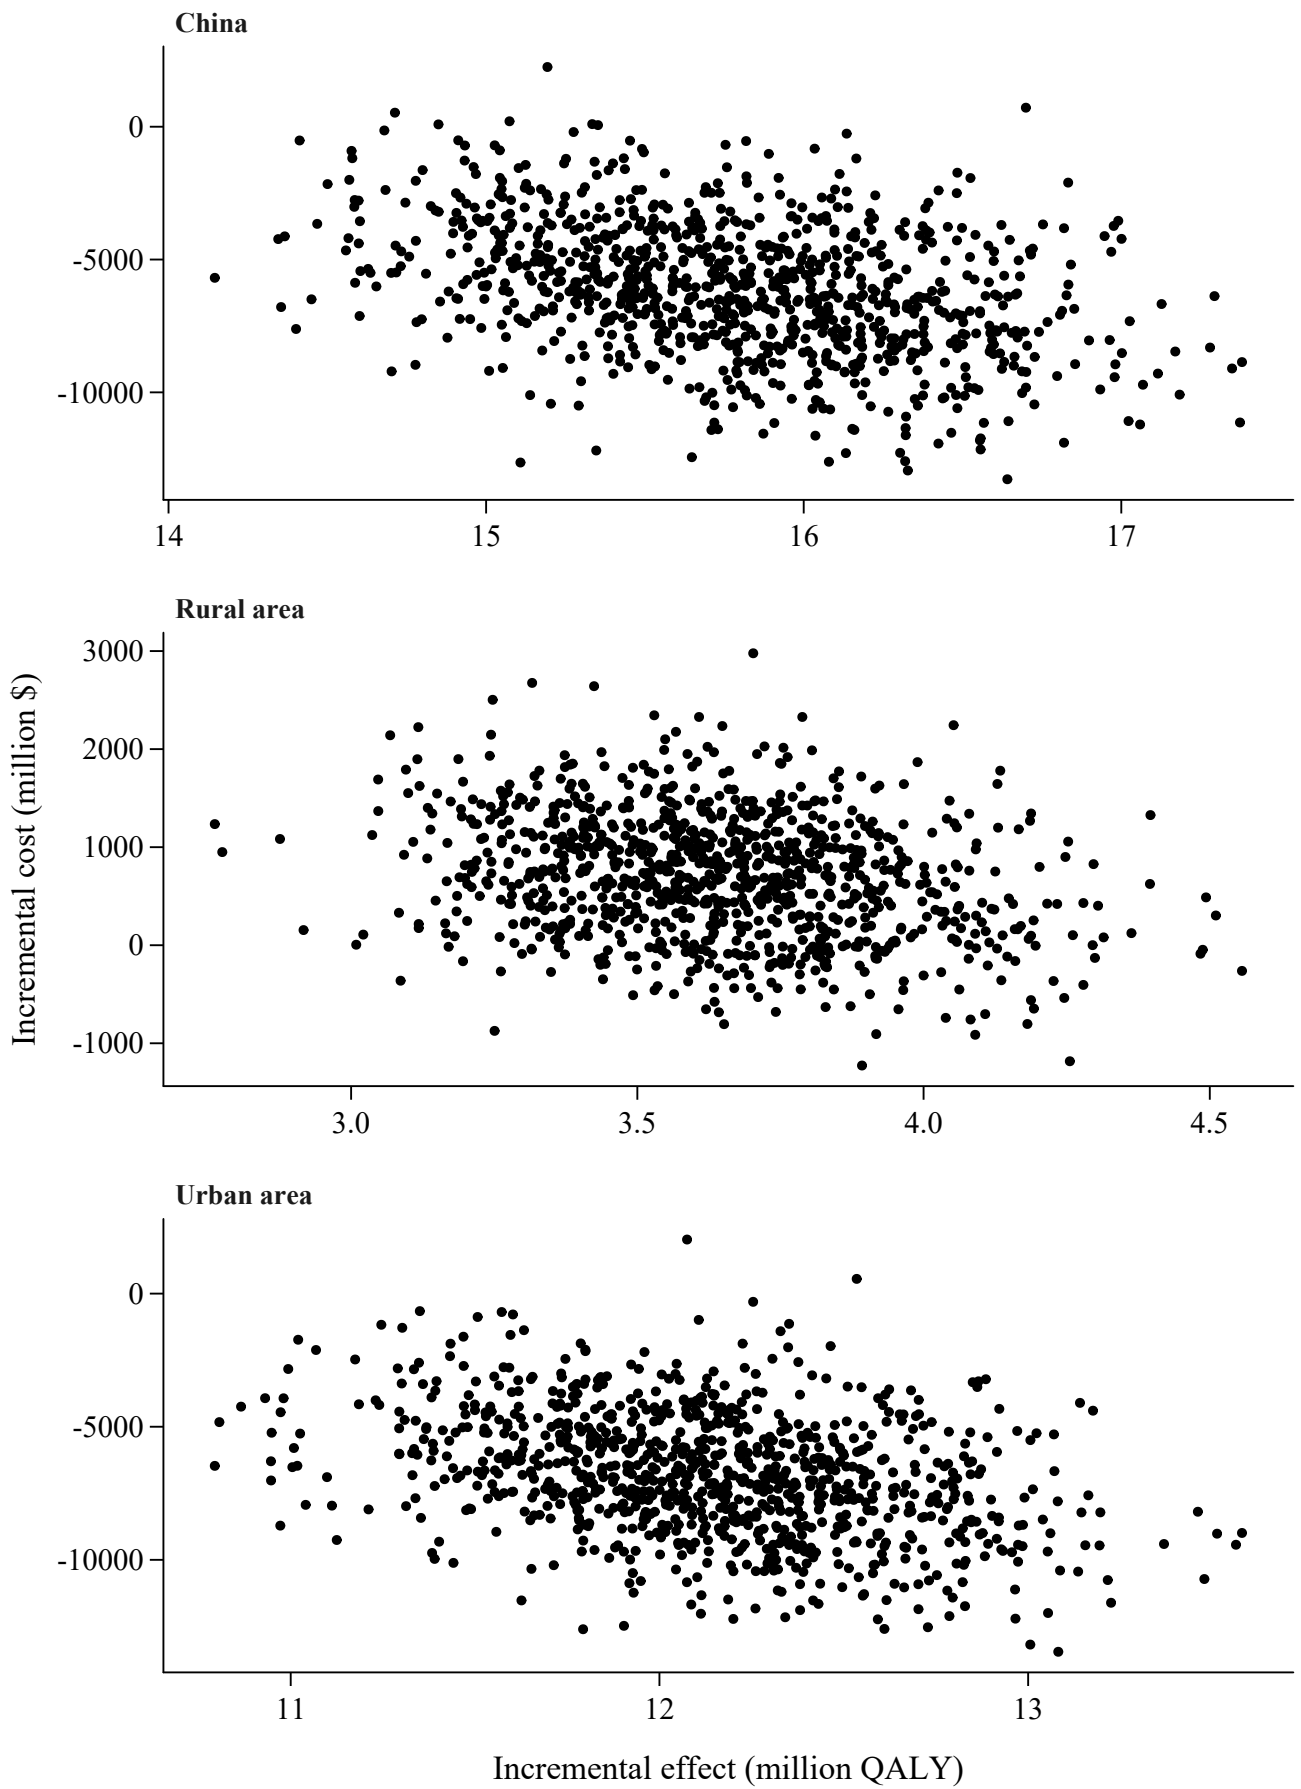

**Figure S4b.** Probabilistic sensitivity analyses for optimal pathway vs. status quo (3% discount)

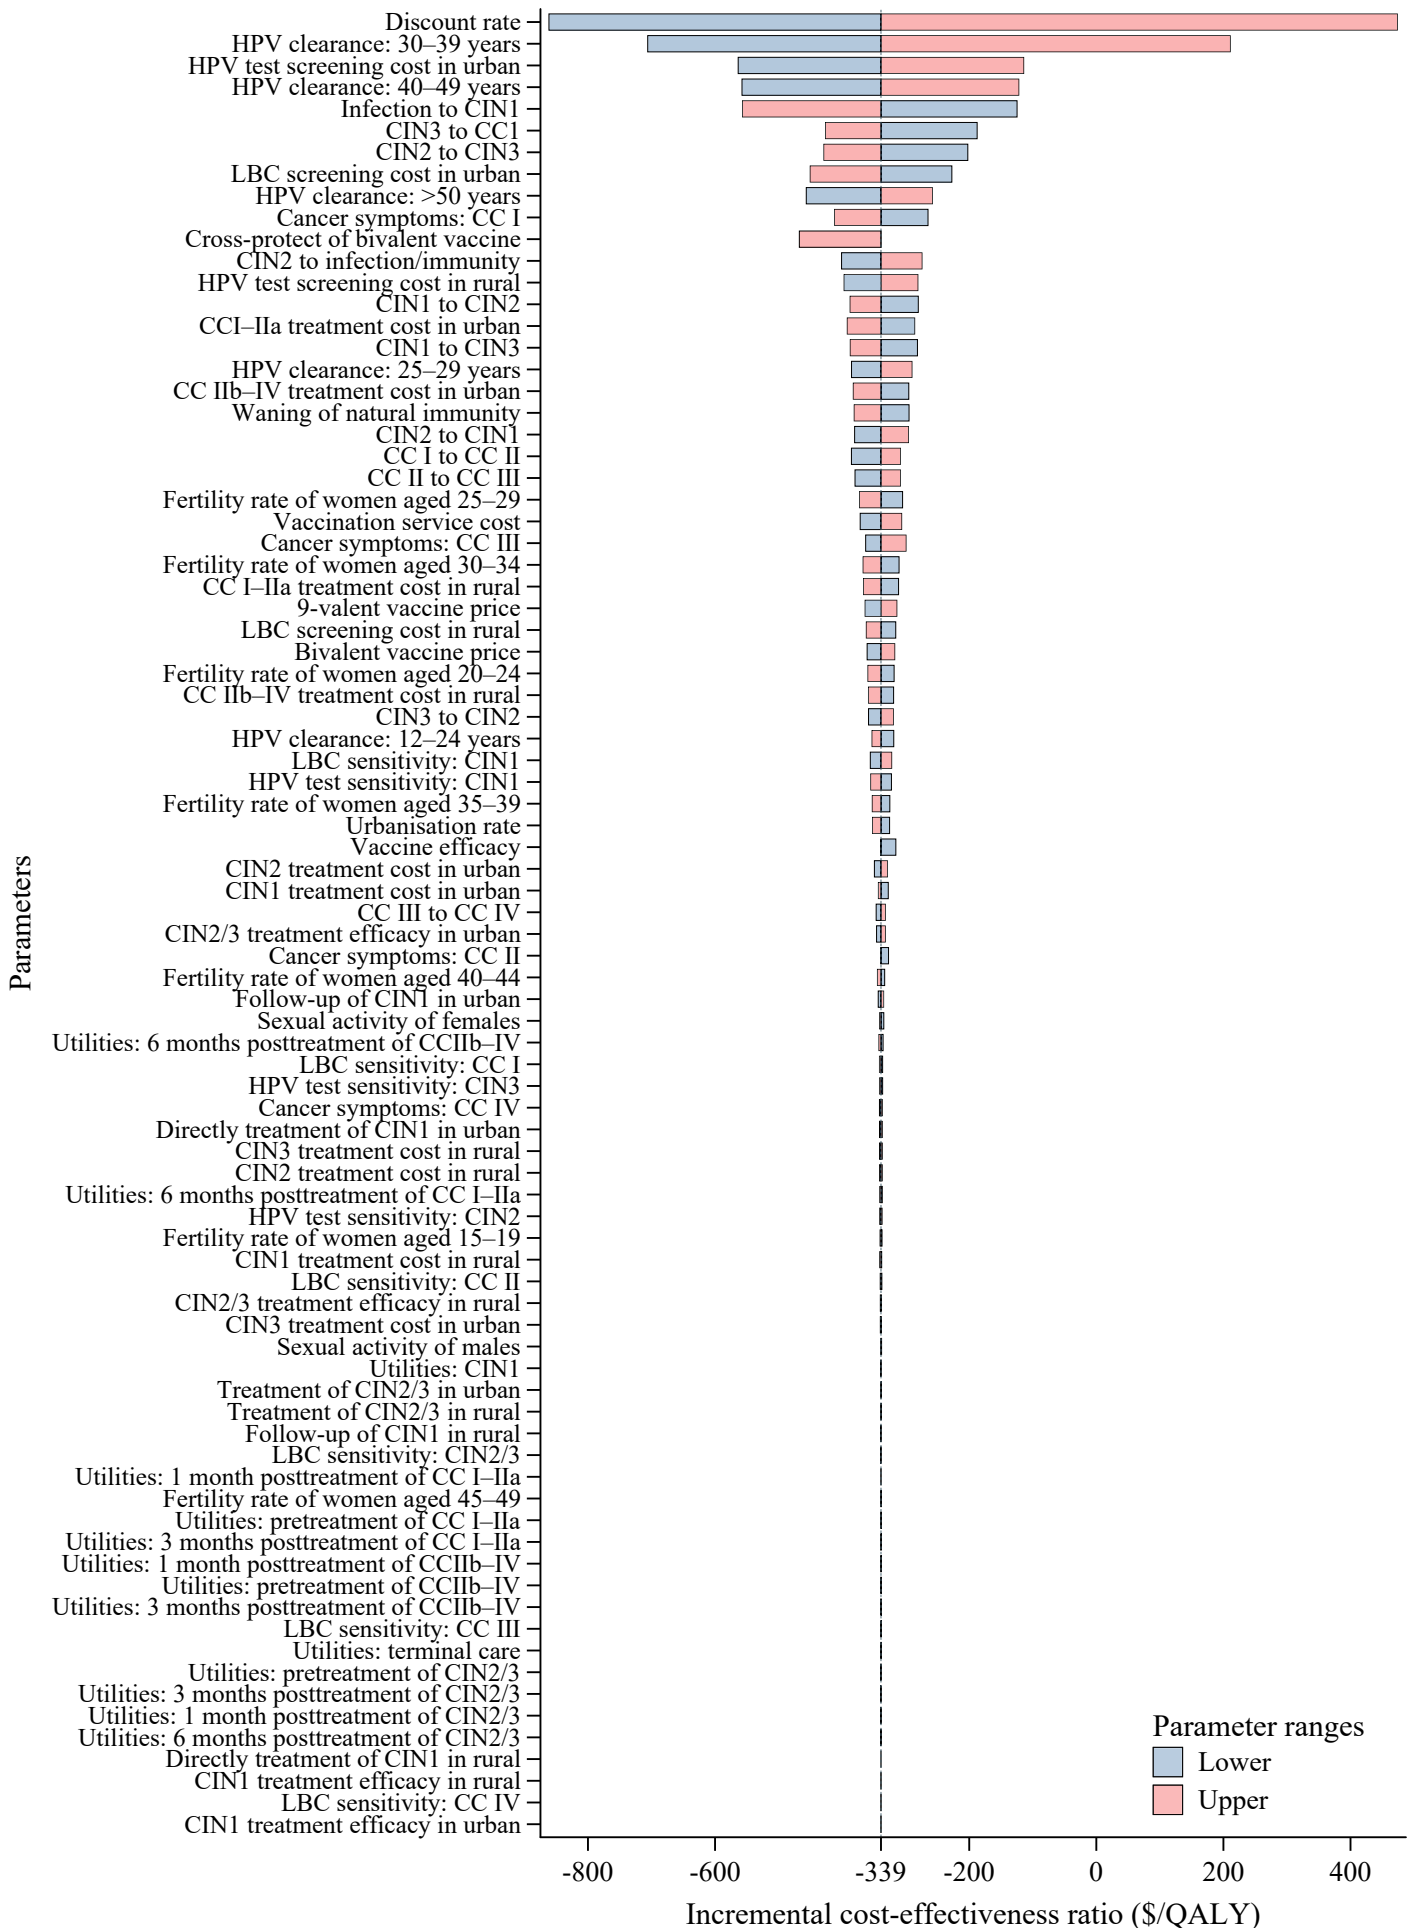

**Figure S5a.** Deterministic sensitivity analyses for optimal pathway vs. status quo in China

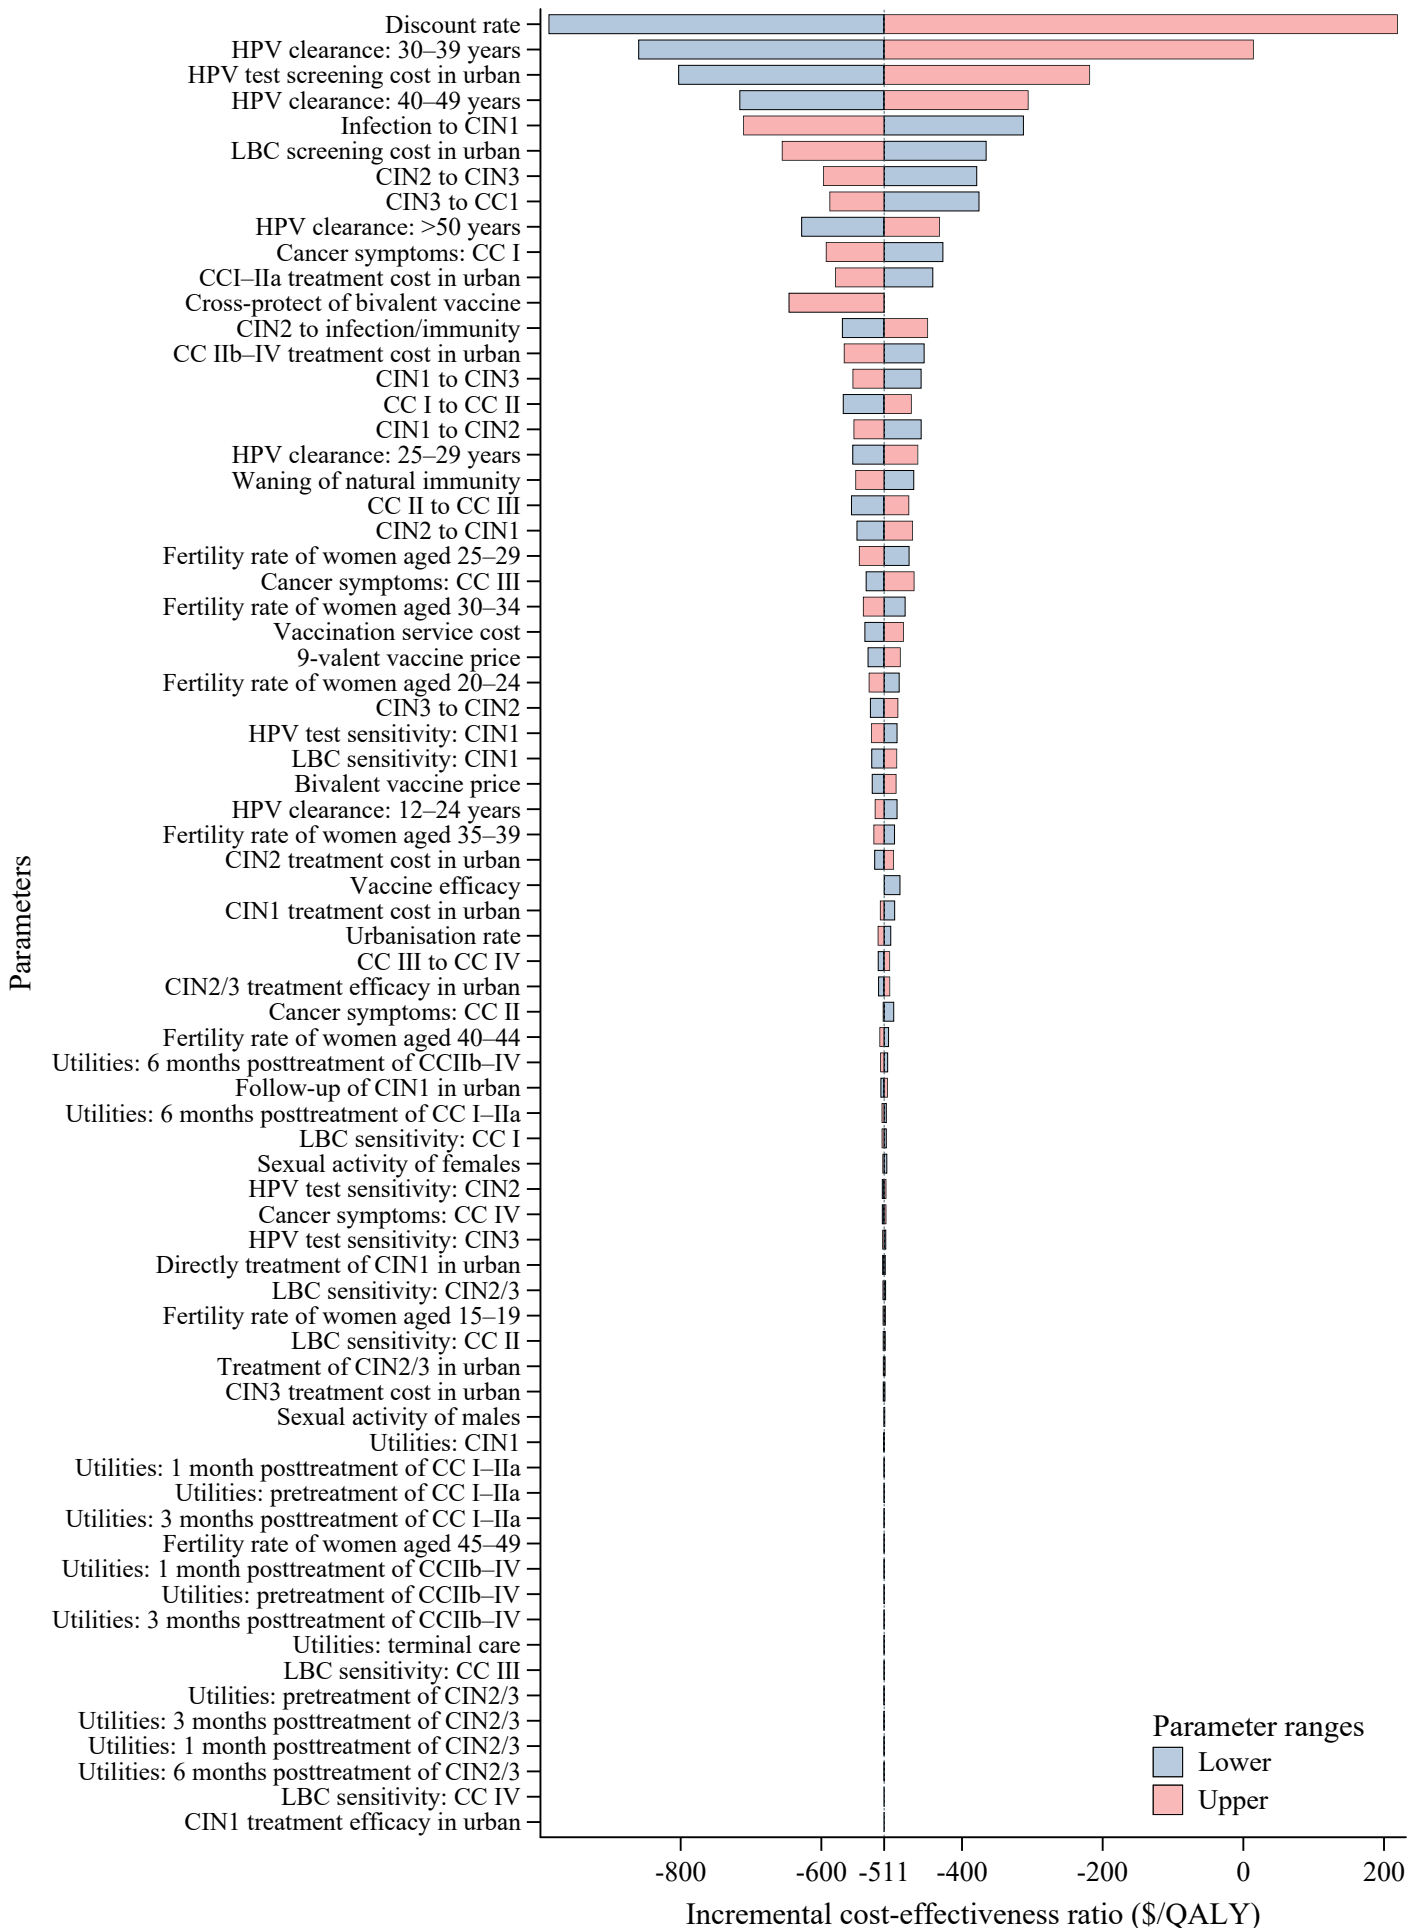

**Figure S5b.** Deterministic sensitivity analyses for optimal pathway vs. status quo in urban area

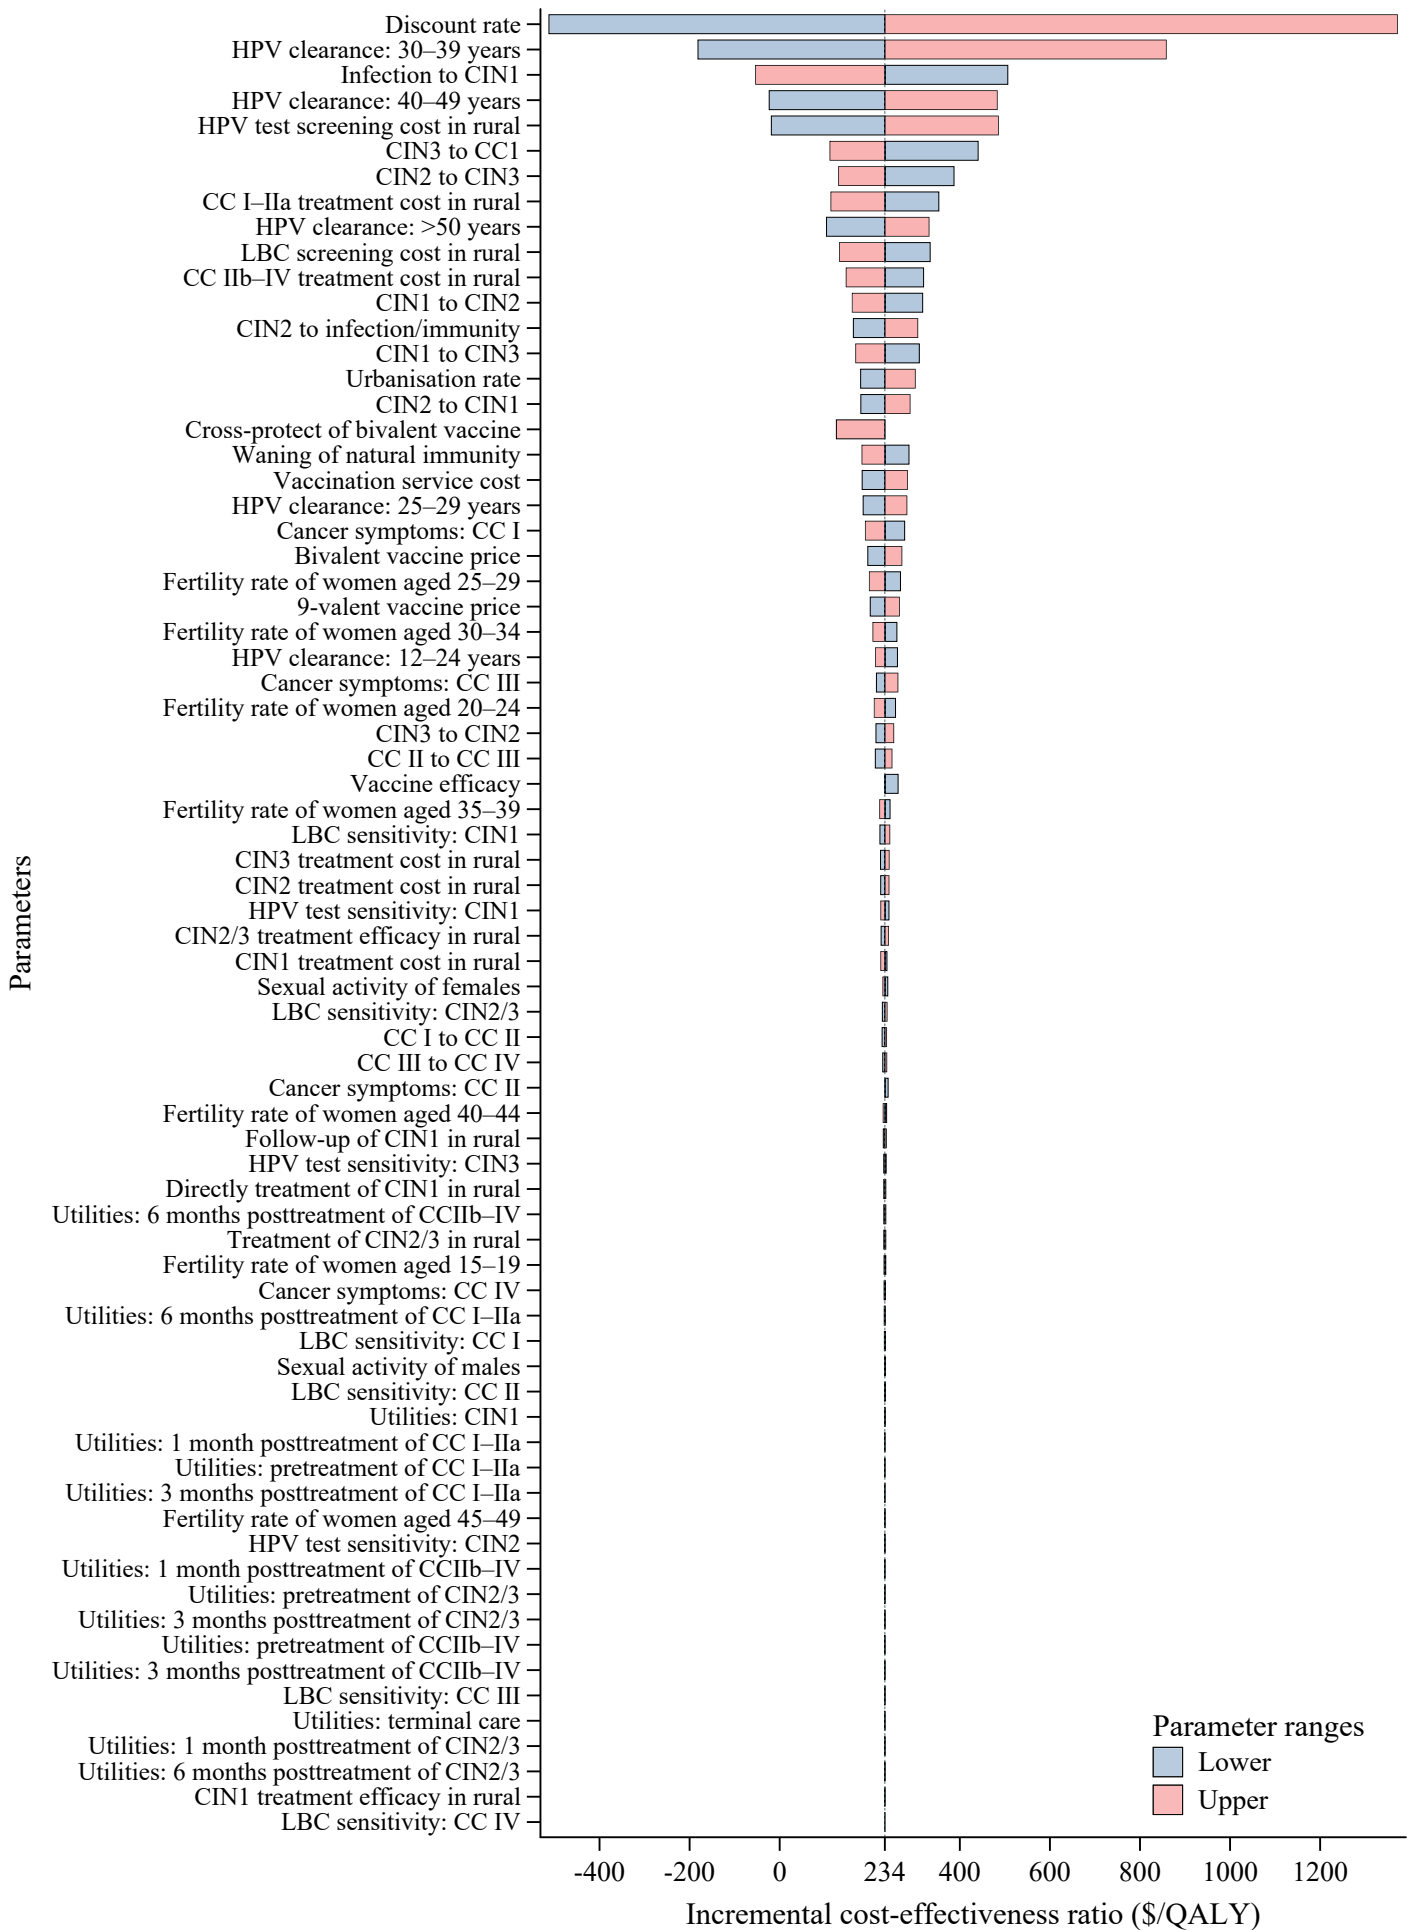

**Figure S5c.** Deterministic sensitivity analyses for optimal pathway vs. status quo in rural area

## ***2.2 Annual costs and benefits***

The annual undiscounted and discounted costs from all four components for optimal pathway and status quo are shown in Figure S6–7. Total annual undiscounted costs for optimal pathway would substantially increase in 2021–25 due to the scale-up of catch-up vaccination and cervical cancer screening, while from 2026 onwards, the total costs of each five years (equal to screening interval of unvaccinated cohorts) would decrease continuously (Figure S6a). Total annual undiscounted costs for status quo would maintain above \$1600 million with the variations driven from the transitions of sociodemographic characteristics (Figure S7a). Total annual discounted costs for optimal pathway would be highest in first five years with the peak at 2025, and then substantially decrease to about \$53 million in 2100 (Figure S6b). Total annual discounted costs for status quo would substantially decrease to about \$156 million in 2100 (Figure S7b).

The annual undiscounted and discounted incremental benefits (ie, QALYs) of optimal pathway compared to status quo are shown in Figure S8. For undiscounted incremental benefits, the values would be negative in first few years before 2026 (filled with red color) because more women with CIN and invasive cancer would be diagnosed, however, values would substantially increase after that and maintain at about one million incremental QALYs from 2070 onwards (Figure S8a). For discounted incremental benefits, although the incremental benefits in the first few years would be negative, the value would always be positive from 2027 onwards with the peak among 2050s (Figure S8b).



■ Vaccination   
 ■ Screening   
 ■ CIN treatment   
 ■ Invasive cancer treatment

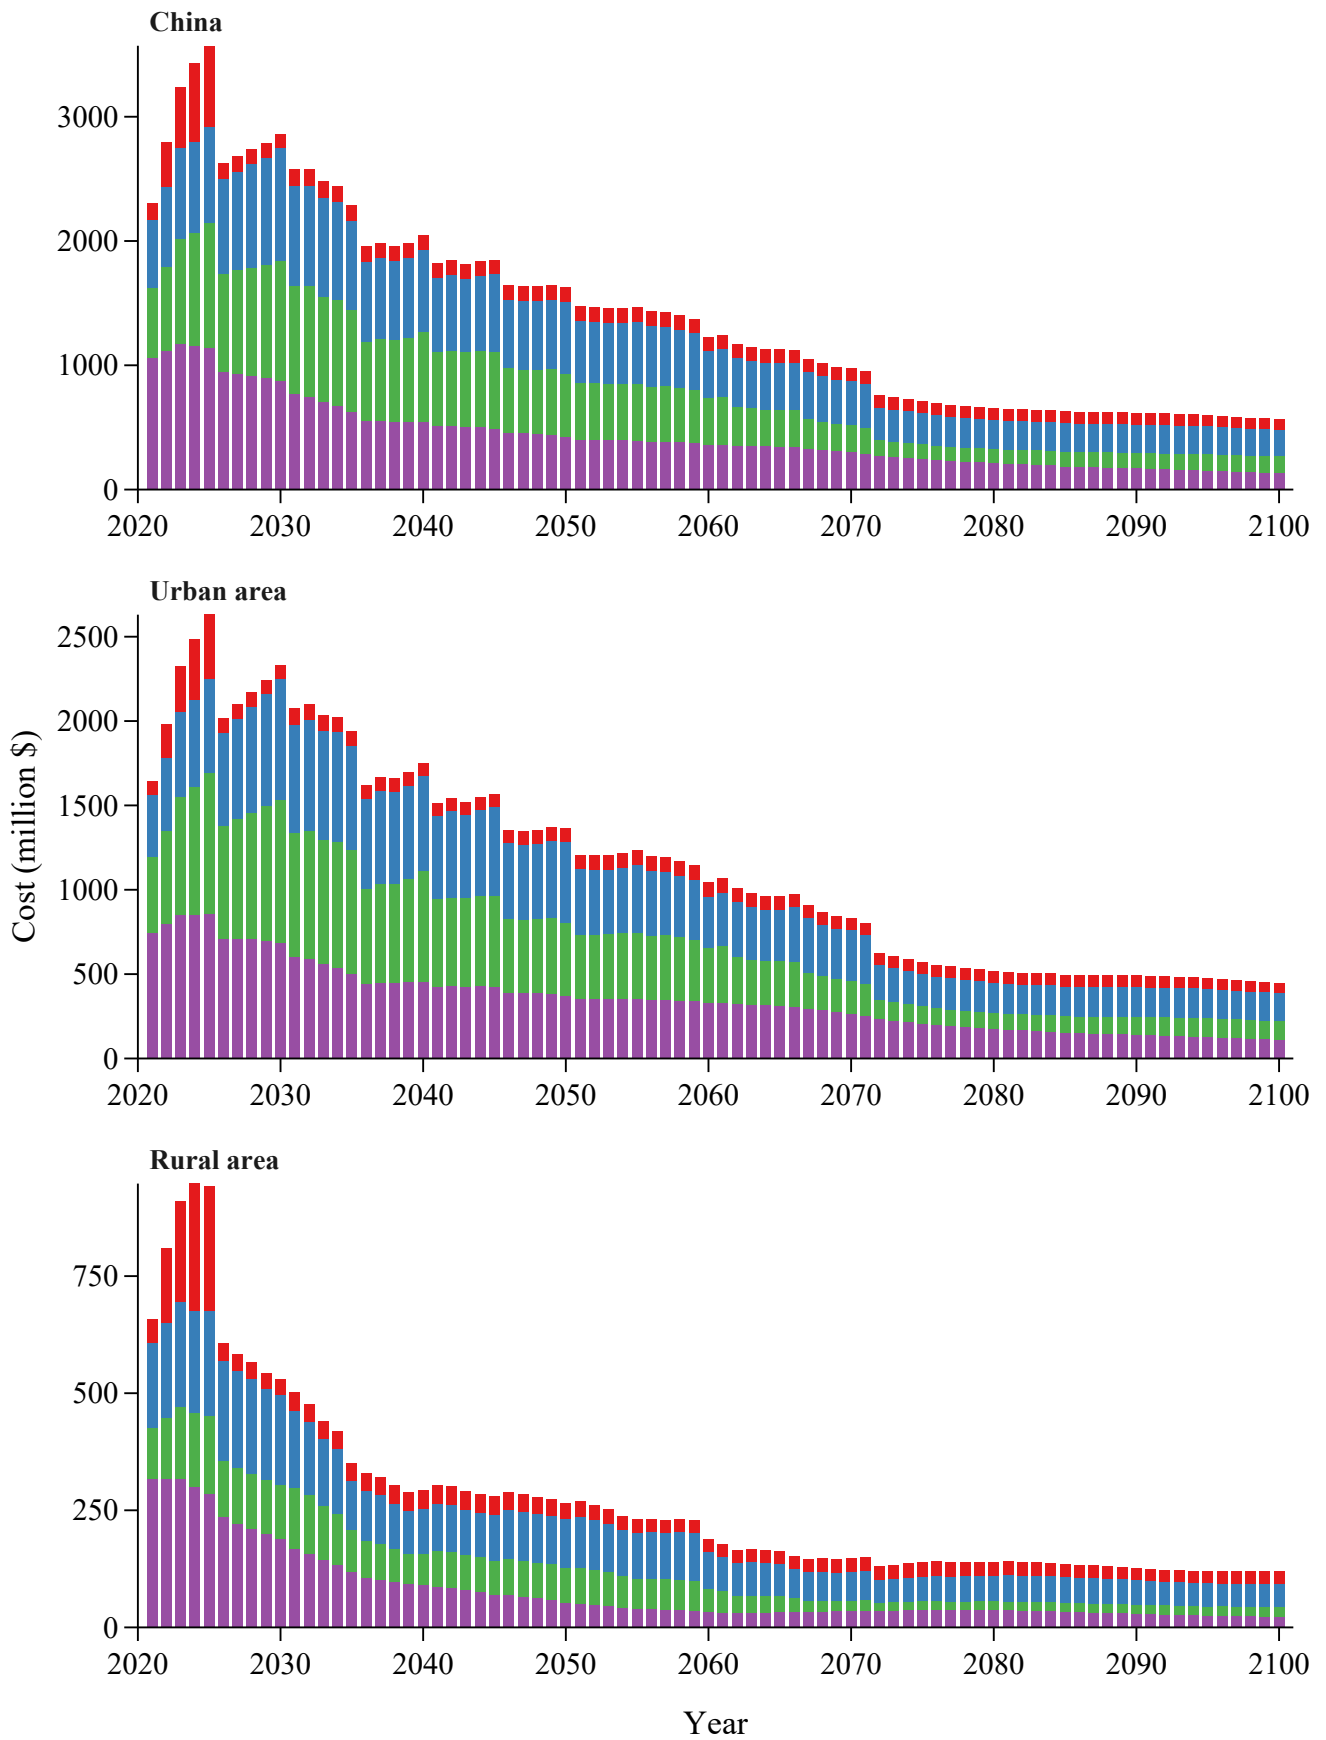

**Figure S6a.** Annual costs of optimal pathway (0% discount)

Vaccination Screening CIN treatment Invasive cancer treatment

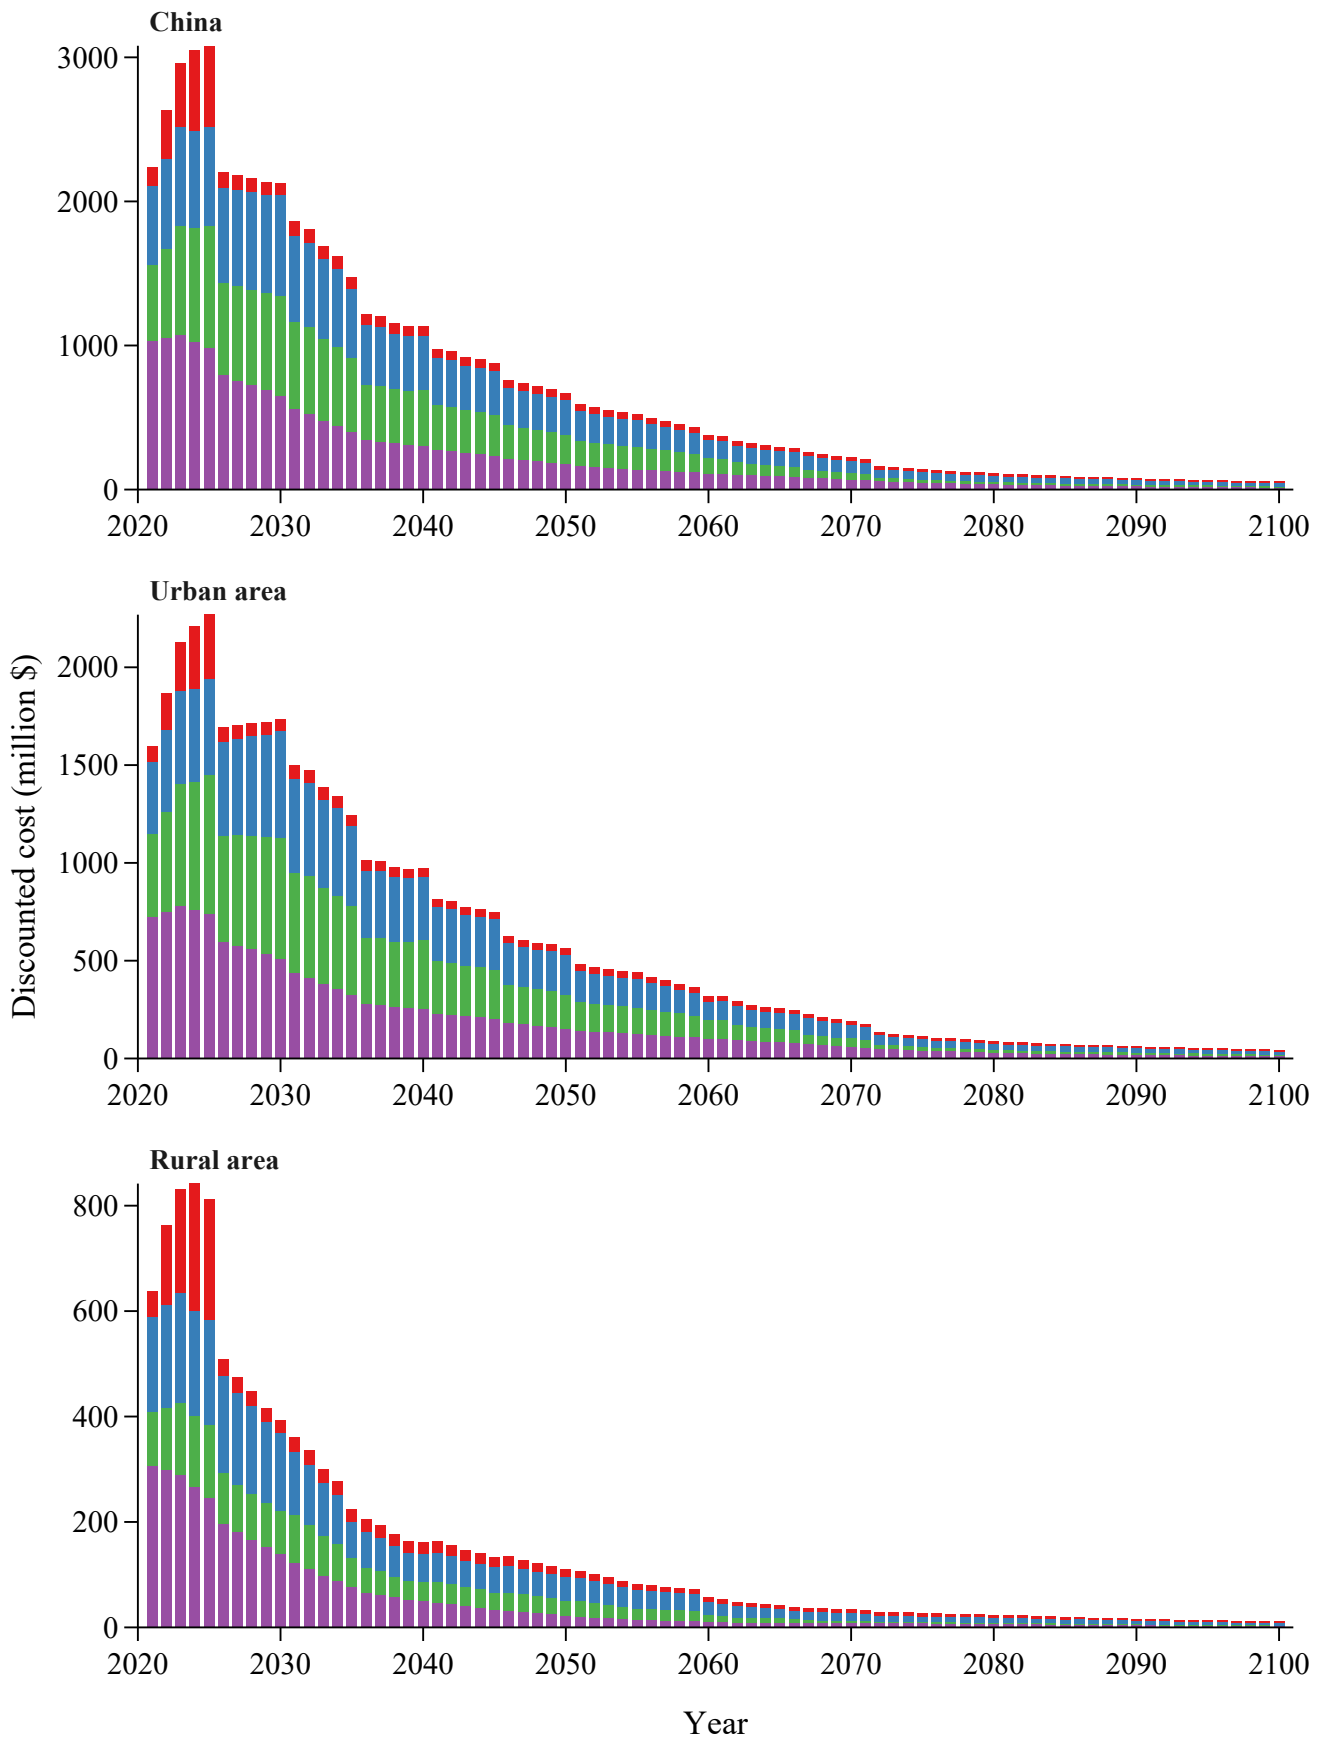

Figure S6b. Annual costs of optimal pathway (3% discount)

■ Vaccination   
 ■ Screening   
 ■ CIN treatment   
 ■ Invasive cancer treatment

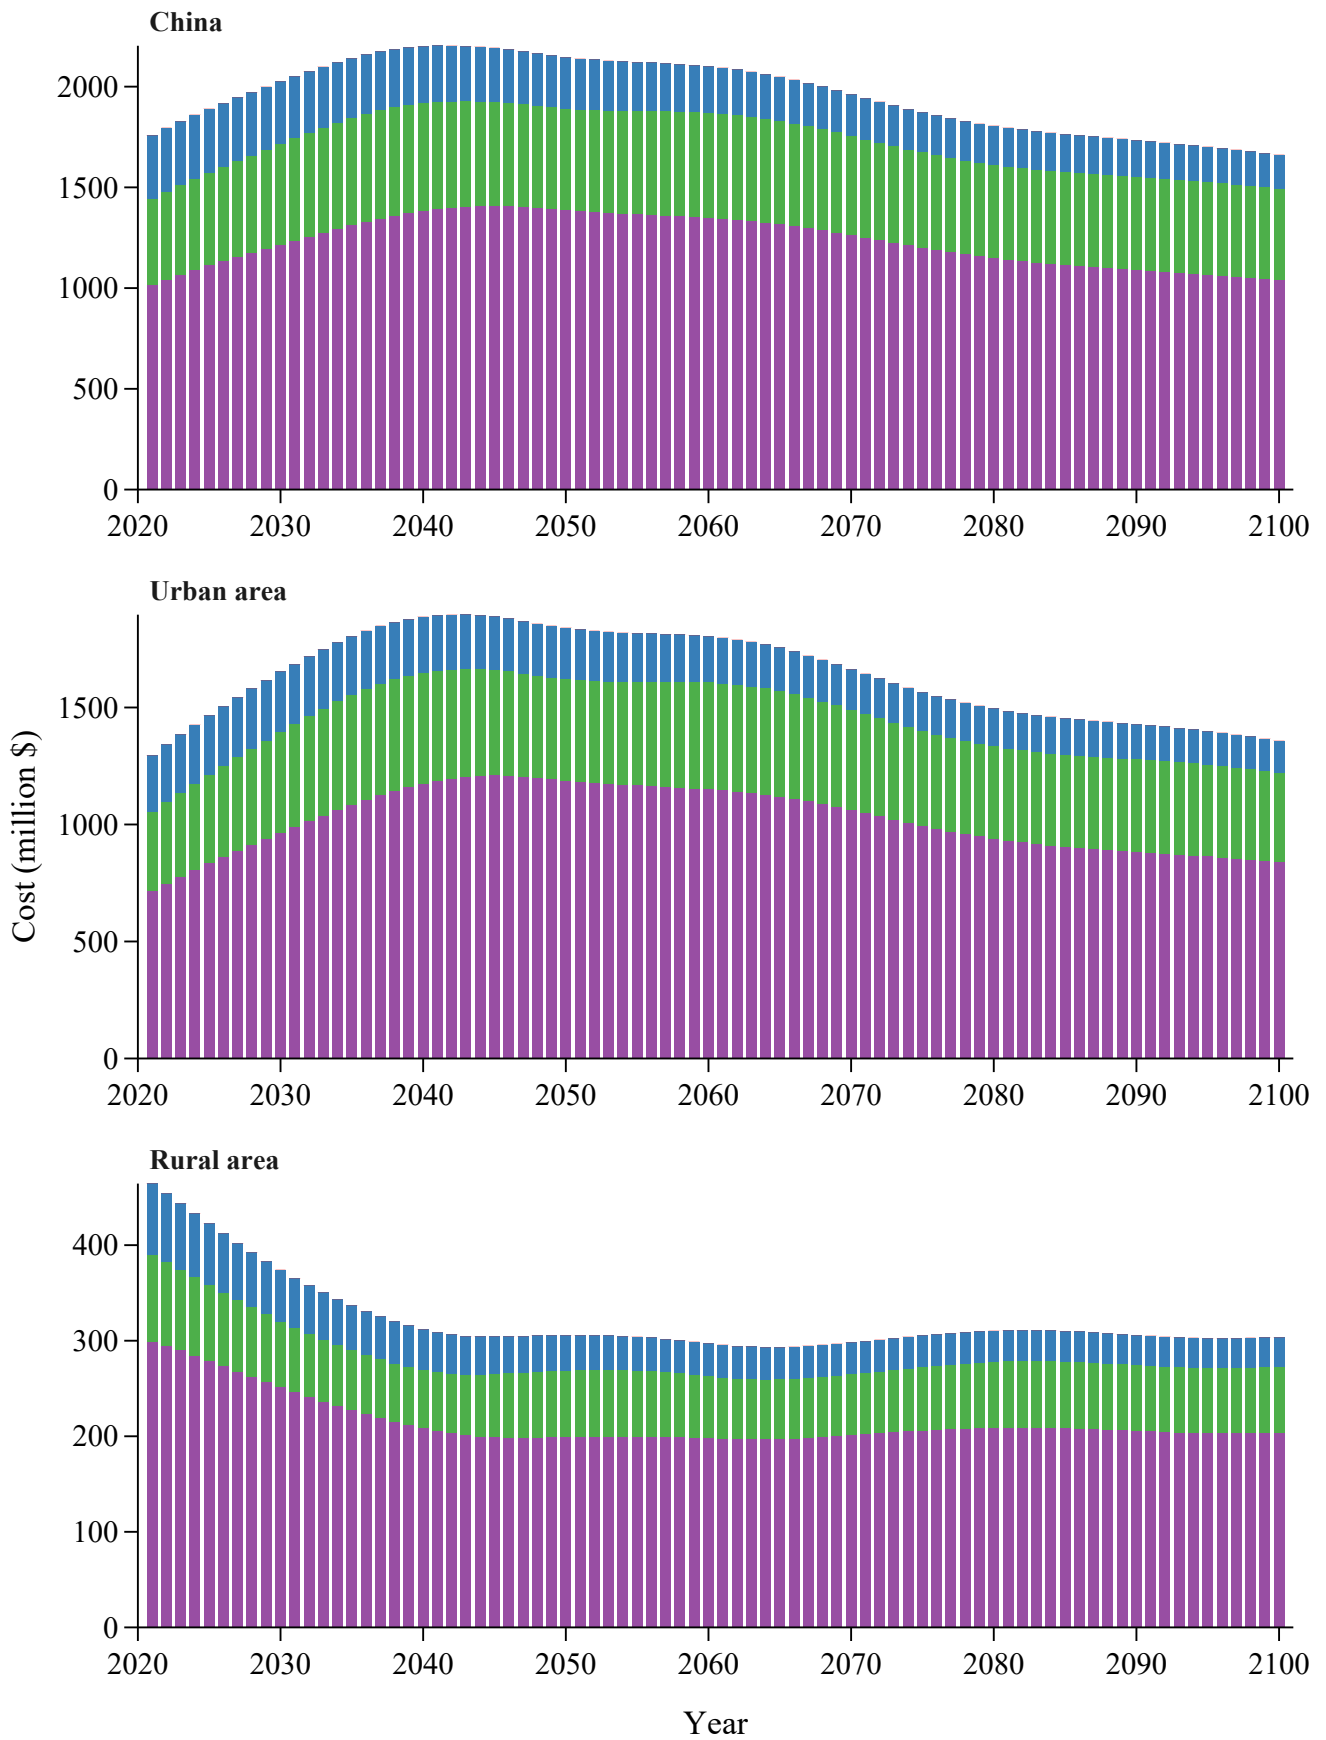

**Figure S7a.** Annual costs of status quo (0% discount)

■ Vaccination   
 ■ Screening   
 ■ CIN treatment   
 ■ Invasive cancer treatment

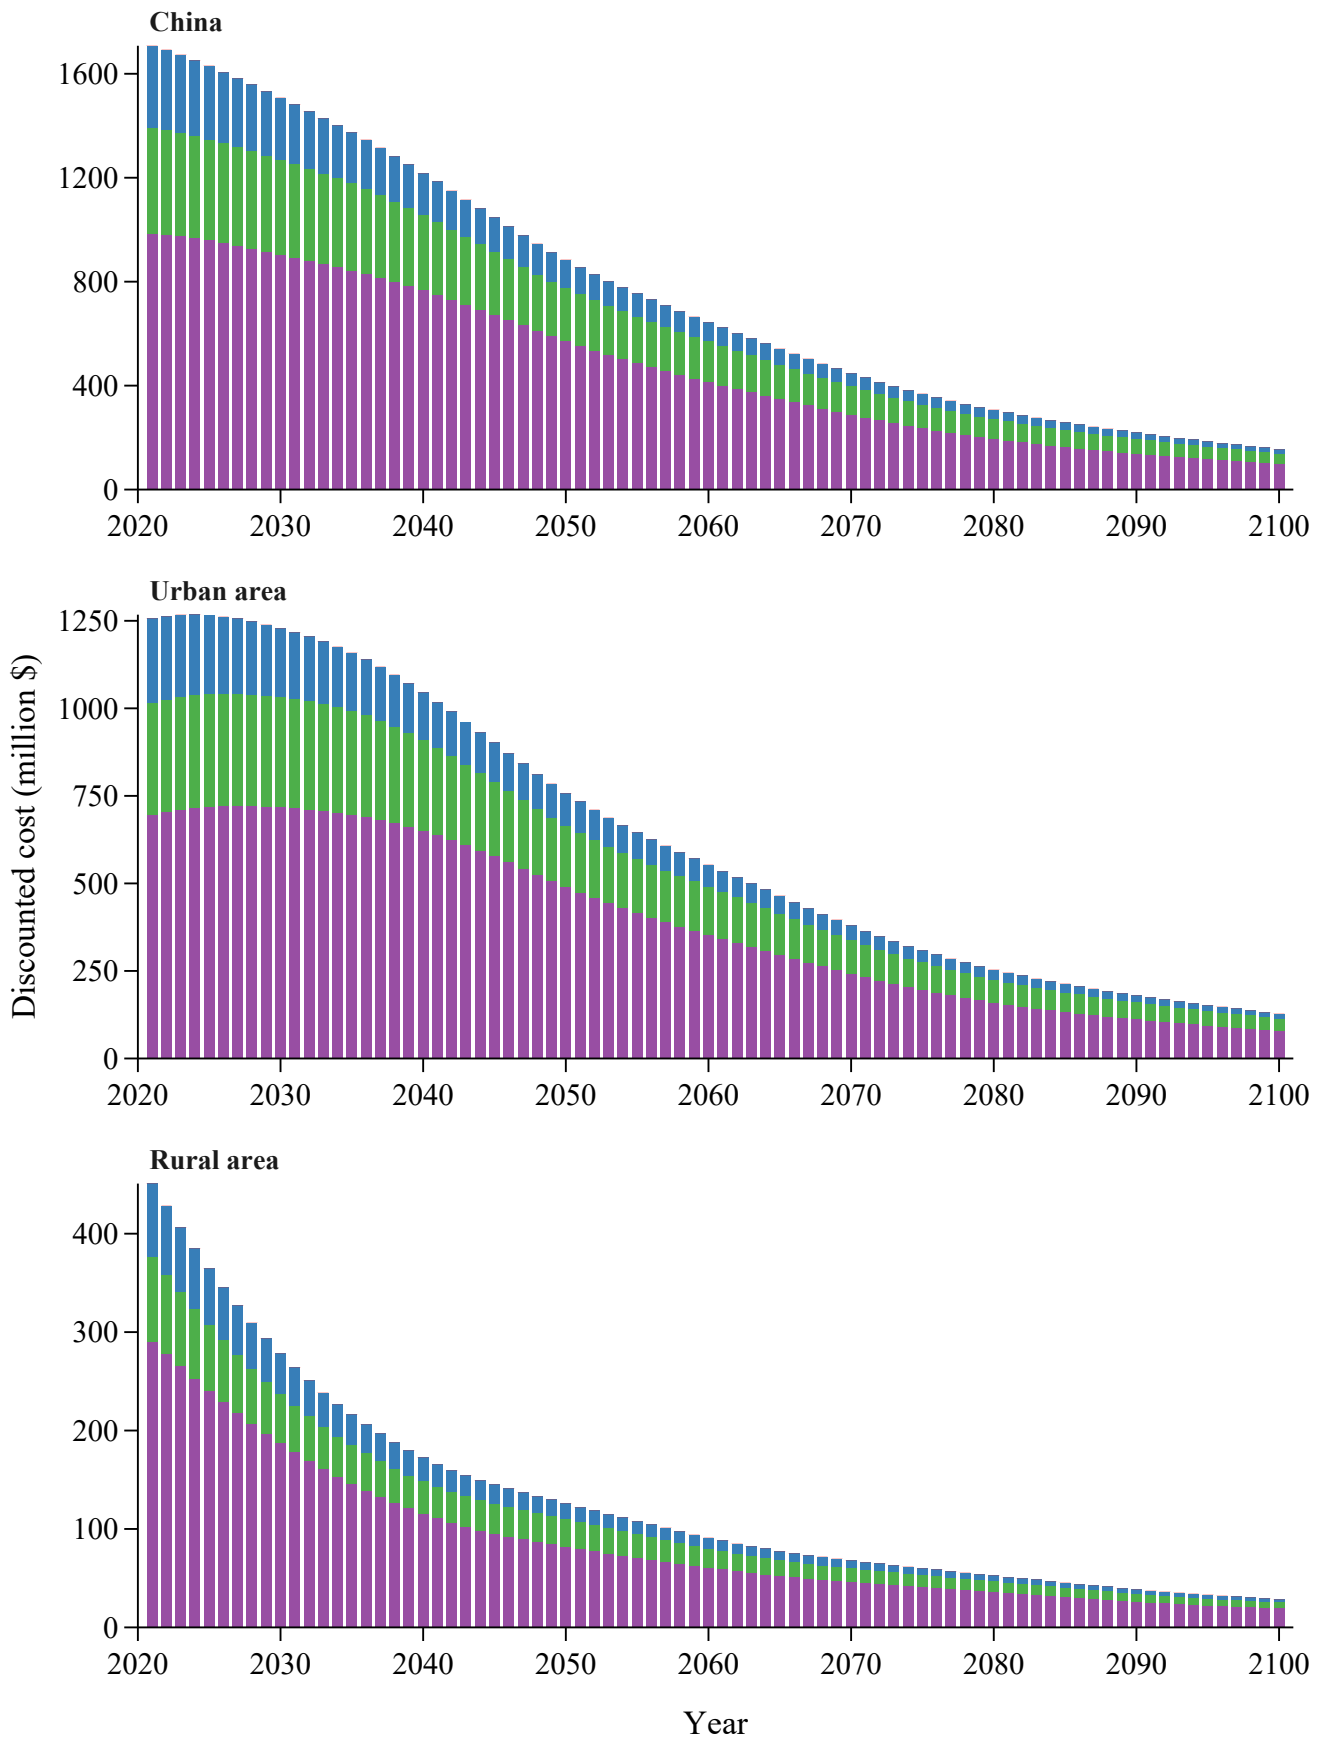

**Figure S7b.** Annual costs of status quo (3% discount)

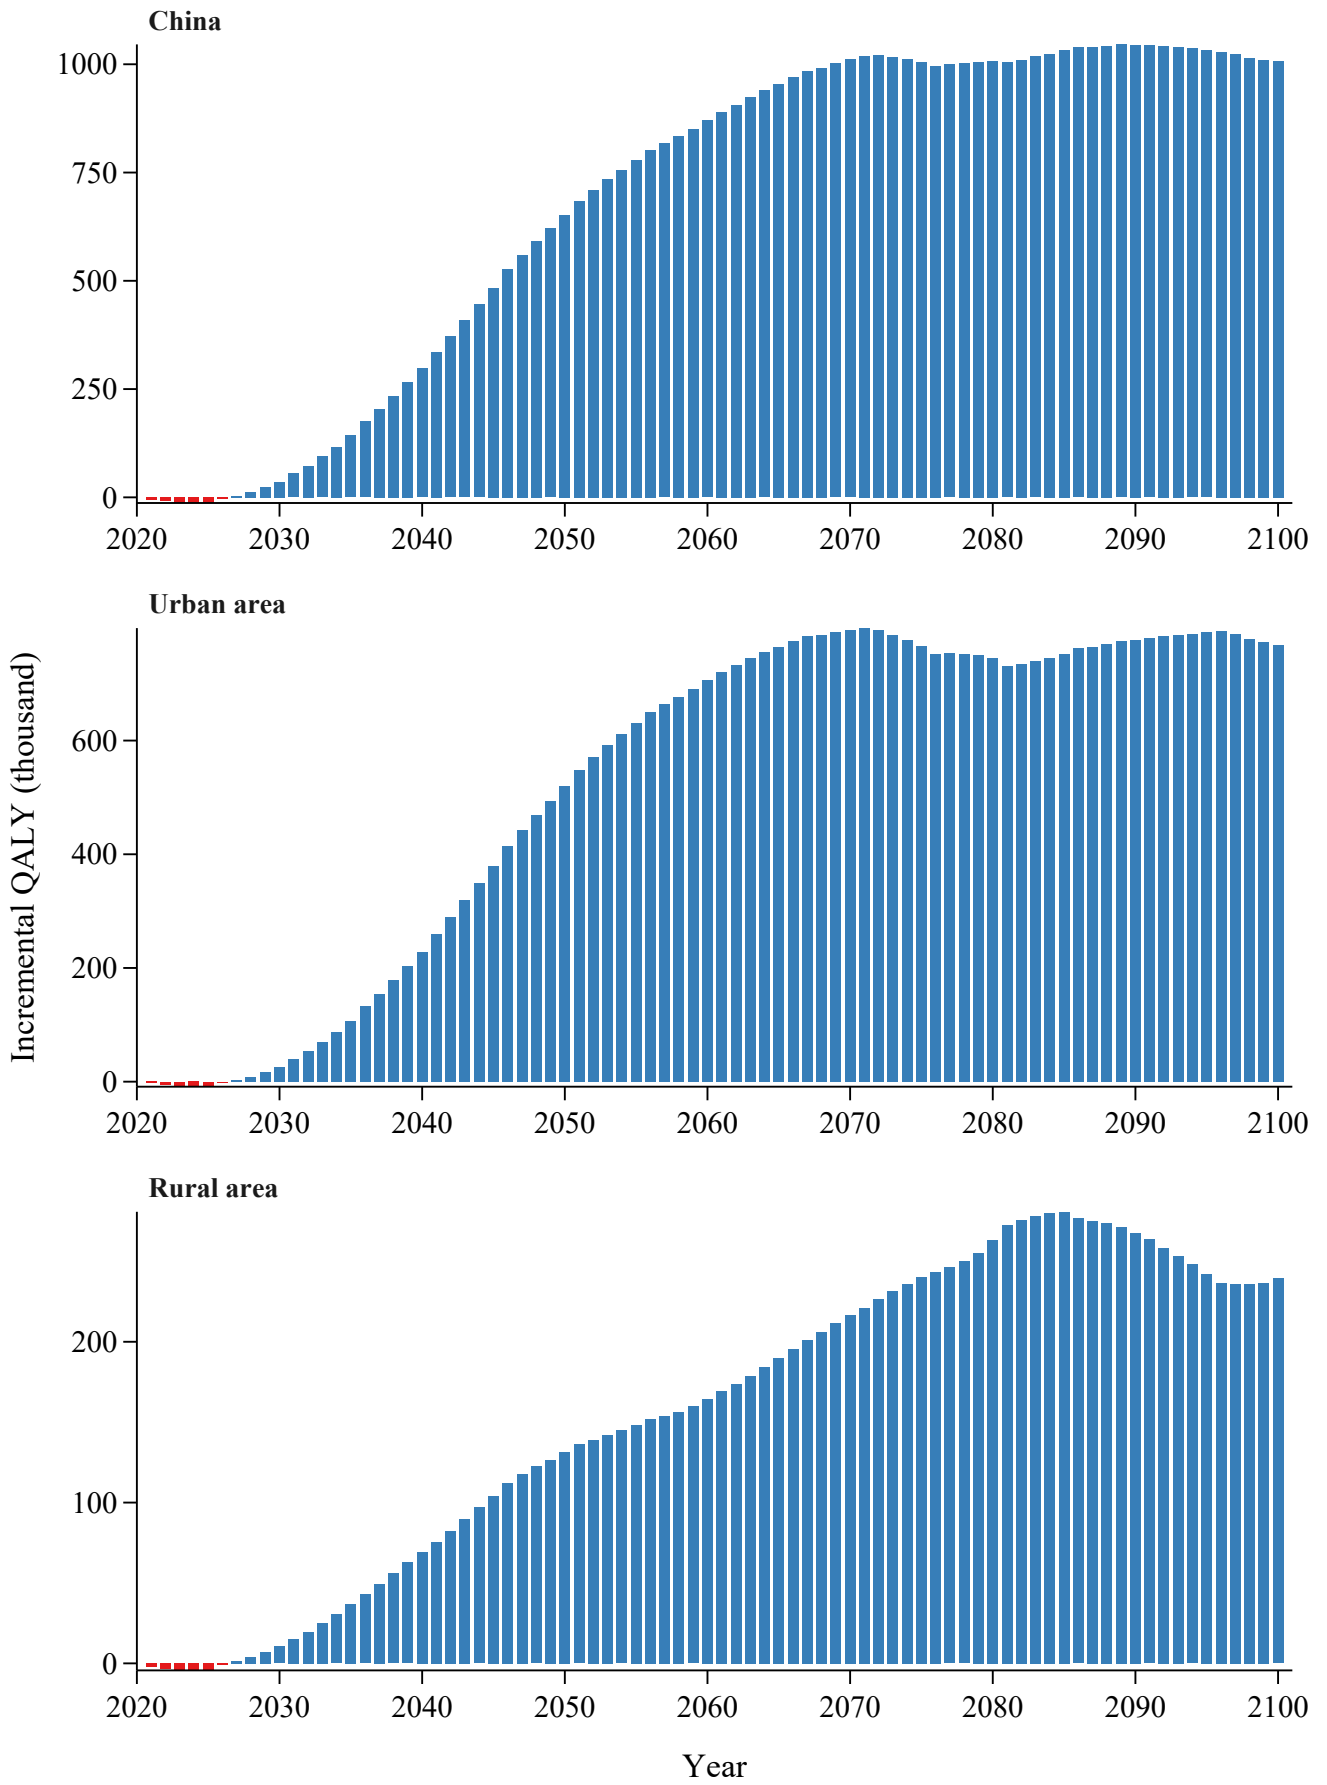

**Figure S8a.** Annual incremental benefits of optimal pathway compared to status quo (0% discount)

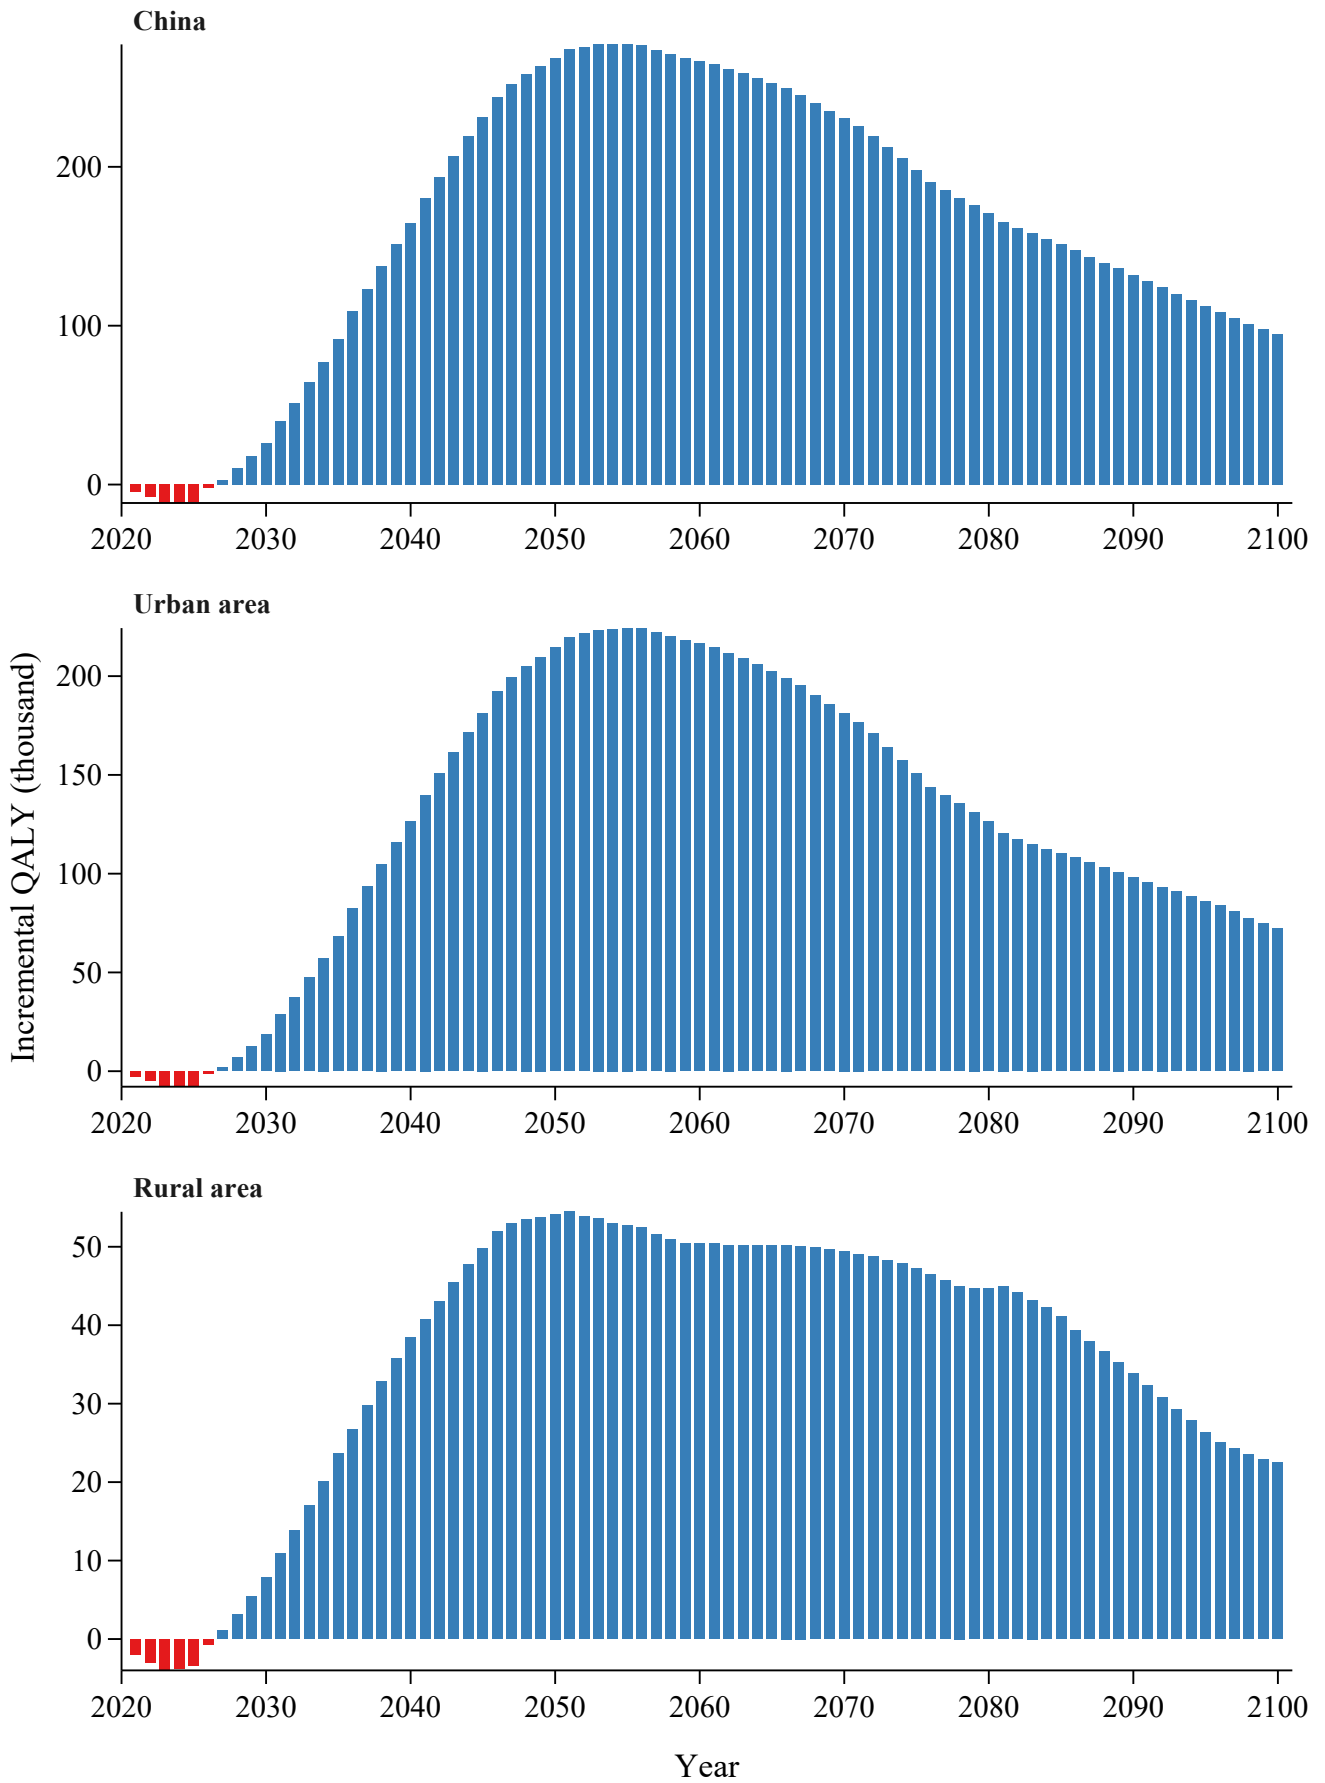

**Figure S8b.** Annual incremental benefits of optimal pathway compared to status quo (3% discount)

## 2.3 Use GDP per capita as threshold

### 2.3.1 Main results

When we use GDP per capita as the threshold, the best strategy simulated by the model was to implement the intensive screening strategy by adopting a shorter screening interval for women compared with the strategy using median annual income as threshold (Figure S9).

-  Bivalent HPV vaccination
-  9-valent HPV vaccination
-  Screening at 35–64, every 3 years
-  Screening at 35–64, every 5 years
-  Screening at 40–55, every 5 years
-  Treatment status quo for CIN
-  Treatment following guidelines for CIN

| Age   | 2021                                                                                                                                                                    | 2022                                                                                                                                                                    | 2023                                                                                                                                                                    | 2024                                                                                                                                                                     | 2025                                                                                                                                                                        |
|-------|-------------------------------------------------------------------------------------------------------------------------------------------------------------------------|-------------------------------------------------------------------------------------------------------------------------------------------------------------------------|-------------------------------------------------------------------------------------------------------------------------------------------------------------------------|--------------------------------------------------------------------------------------------------------------------------------------------------------------------------|-----------------------------------------------------------------------------------------------------------------------------------------------------------------------------|
| 9     | 95%                                                                                    | 95%                                                                                    | 95%                                                                                    | 95%                                                                                     | 95%                                                                                        |
| 10–13 |                                                                                                                                                                         |                                                                                                                                                                         |                                                                                                                                                                         |                                                                                                                                                                          |                                                                                                                                                                             |
| 14    |                                                                                                                                                                         | 90%                                                                                    | 90%                                                                                    | 90%                                                                                     | 90%                                                                                        |
| 15    |                                                                                                                                                                         | 10%                                                                                    |                                                                                                                                                                         |                                                                                                                                                                          |                                                                                                                                                                             |
| 16    |                                                                                                                                                                         | 10%                                                                                    | 20%                                                                                    |                                                                                                                                                                          |                                                                                                                                                                             |
| 17    |                                                                                                                                                                         | 10%                                                                                    | 20%                                                                                    | 30%                                                                                     |                                                                                                                                                                             |
| 18–22 |                                                                                                                                                                         | 10%                                                                                   | 20%                                                                                   | 30%                                                                                    | 30%                                                                                       |
| 23    |                                                                                                                                                                         |                                                                                                                                                                         | 20%                                                                                  | 30%                                                                                   | 30%                                                                                      |
| 24    |                                                                                                                                                                         |                                                                                                                                                                         |                                                                                                                                                                         | 30%                                                                                   | 30%                                                                                      |
| 25    |                                                                                                                                                                         |                                                                                                                                                                         |                                                                                                                                                                         |                                                                                                                                                                          | 30%                                                                                      |
| 35–64 | 35%   | 40%   | 45%   | 50%   | 55%   |

| Age   | 2026                                                                                                                                                                          | 2027                                                                                                                                                                          | 2028                                                                                                                                                                          | 2029                                                                                                                                                                          | 2030                                                                                                                                                                          |
|-------|-------------------------------------------------------------------------------------------------------------------------------------------------------------------------------|-------------------------------------------------------------------------------------------------------------------------------------------------------------------------------|-------------------------------------------------------------------------------------------------------------------------------------------------------------------------------|-------------------------------------------------------------------------------------------------------------------------------------------------------------------------------|-------------------------------------------------------------------------------------------------------------------------------------------------------------------------------|
| 9     | 95%                                                                                        | 95%                                                                                        | 95%                                                                                        | 95%                                                                                        | 95%                                                                                        |
| 10–25 |                                                                                                                                                                               |                                                                                                                                                                               |                                                                                                                                                                               |                                                                                                                                                                               |                                                                                                                                                                               |
| 35–64 | 60%   | 65%   | 70%   | 73%   | 76%   |

| Age                  | 2031                                                                                                                                                                            | 2032                                                                                                                                                                            | 2033                                                                                                                                                                            | 2034                                                                                                                                                                            | 2035–61                                                                                                                                                                         |
|----------------------|---------------------------------------------------------------------------------------------------------------------------------------------------------------------------------|---------------------------------------------------------------------------------------------------------------------------------------------------------------------------------|---------------------------------------------------------------------------------------------------------------------------------------------------------------------------------|---------------------------------------------------------------------------------------------------------------------------------------------------------------------------------|---------------------------------------------------------------------------------------------------------------------------------------------------------------------------------|
| 9                    | 95%                                                                                        | 95%                                                                                        | 95%                                                                                        | 95%                                                                                        | 95%                                                                                        |
| 10–25                |                                                                                                                                                                                 |                                                                                                                                                                                 |                                                                                                                                                                                 |                                                                                                                                                                                 |                                                                                                                                                                                 |
| 35–64 (unvaccinated) | 79%   | 82%   | 85%   | 88%   | 90%   |
| 35–64 (bivalent)     |                                                                                                                                                                                 |                                                                                                                                                                                 |                                                                                                                                                                                 |                                                                                                                                                                                 | 90%   |

| Age              | 2062–81                                                                                                                                                                         | 2082–2100                                                                                                                                                                       |
|------------------|---------------------------------------------------------------------------------------------------------------------------------------------------------------------------------|---------------------------------------------------------------------------------------------------------------------------------------------------------------------------------|
| 9                | 95%                                                                                        | 95%                                                                                        |
| 10–25            |                                                                                                                                                                                 |                                                                                                                                                                                 |
| 35–64 (bivalent) | 90%   |                                                                                                                                                                                 |
| 35–64 (9-valent) | 90%   | 90%   |

*Note:* The percentages and background colors in each cell indicate the population coverages.

**Figure S9.** Optimal pathway towards cervical cancer elimination in China (use GDP per capita as threshold)

HPV, human papillomavirus; CIN, cervical intraepithelial neoplasia.

If China adopts the optimal pathway (use GDP per capita as threshold) from 2021 onwards, cervical cancer would be eliminated by 2035 (2035–2036) for urban area and 2036 (2036–2037) for rural area (Figure S10). The discounted ICER of optimal pathway (use GDP per capita as threshold) compared to status quo were \$-62 (-534, 330) for urban area and \$566 (160, 939) (Table S9). However, the discounted ICER of optimal pathway using GDP per capita as threshold compared to optimal pathway using median income as threshold were \$4305 (3115, 6154) for urban area and \$4503 (3386, 6292) (Table S10). In 2021–2100, we estimated that a total of 8312 291 (7710 690, 9075 118) cervical cancer cases and 2863 715 (2701 823, 3089 380) cervical cancer deaths would be averted in China by adopting optimal pathway (use GDP per capita as threshold) from 2021 onwards (Table S11).

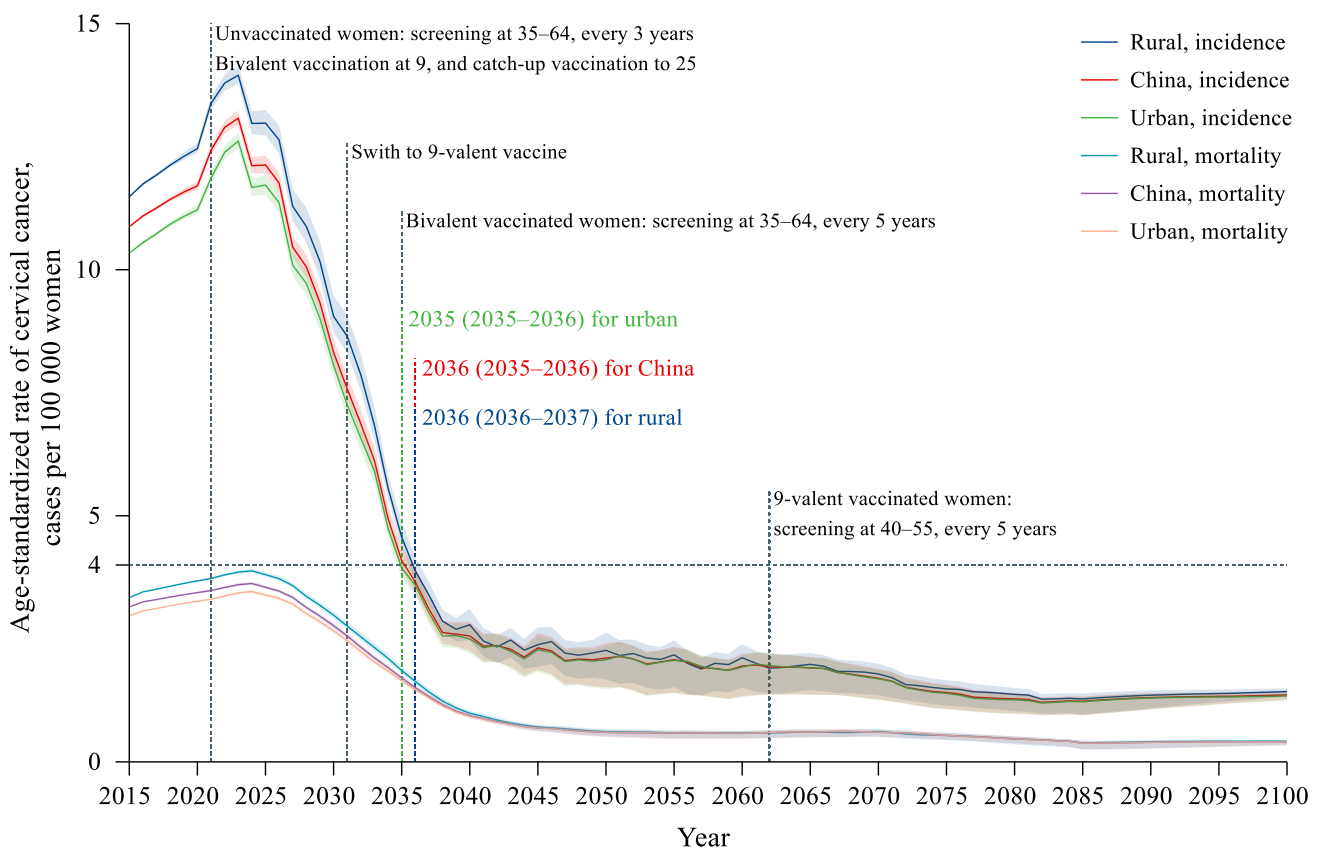

**Figure S10.** Age-standardized cervical cancer incidence and mortality by adopting optimal pathway (use GDP per capita as threshold)

*The solid line represents the base case estimates and shaded area represents the 95% confidence intervals based on 1,000 simulations of probabilistic sensitivity analysis.*



**Table S9.** Lifetime costs, effectiveness, and incremental cost-effectiveness for optimal pathway (use GDP per capita as threshold) vs. status quo\*

| Strategy          | 0% discount rate                   |                                 |                          | 3% discount rate                   |                                 |                          |
|-------------------|------------------------------------|---------------------------------|--------------------------|------------------------------------|---------------------------------|--------------------------|
|                   | Total costs<br>million \$ (95% CI) | Total QALYs<br>million (95% CI) | ICER<br>\$/QALY (95% CI) | Total costs<br>million \$ (95% CI) | Total QALYs<br>million (95% CI) | ICER<br>\$/QALY (95% CI) |
| <b>China</b>      |                                    |                                 |                          |                                    |                                 |                          |
| Status quo        | 235 233<br>(202 975, 274 054)      | 62 061<br>(53 812, 71 934)      | ..                       | 64 516<br>(60 785, 68 688)         | 19 907<br>(18 803, 21 106)      | ..                       |
| Optimal pathway   | 150 632<br>(129 921, 172 238)      | 62 183<br>(53 917, 72 078)      | -691<br>(-852, -564)     | 65 916<br>(58 970, 71 486)         | 19 924<br>(18 820, 21 124)      | 82<br>(-325, 420)        |
| <b>Urban area</b> |                                    |                                 |                          |                                    |                                 |                          |
| Status quo        | 192 864<br>(167 384, 224 928)      | 46 214<br>(40 370, 53 409)      | ..                       | 53 387<br>(49 723, 57 458)         | 14 689<br>(13 864, 15 656)      | ..                       |
| Optimal pathway   | 120 690<br>(102 113, 139 856)      | 46 305<br>(40 447, 53 515)      | -799<br>(-993, -635)     | 52 571<br>(46 353, 58 344)         | 14 702<br>(13 877, 15 670)      | -62<br>(-534, 330)       |
| <b>Rural area</b> |                                    |                                 |                          |                                    |                                 |                          |
| Status quo        | 42 369<br>(33 919, 53 818)         | 15 846<br>(13 269, 19 448)      | ..                       | 11 130<br>(9 565, 12 860)          | 5218<br>(4733, 5818)            | ..                       |
| Optimal pathway   | 29 942<br>(24 469, 35 761)         | 15 878<br>(13 295, 19 489)      | -388<br>(-556, -235)     | 13 346<br>(11 511, 15 109)         | 5222<br>(4737, 5822)            | 566<br>(160, 939)        |

QALY, quality-adjusted life-year; ICER, incremental cost-effectiveness ratio.

\* Components may not sum to totals due to rounding.

**Table S10.** Lifetime costs, effectiveness, and incremental cost-effectiveness for optimal pathway using GDP per capita as threshold vs. optimal pathway using median income as threshold\*

| Strategy                                             | 0% discount rate                   |                                 |                          | 3% discount rate                   |                                 |                          |
|------------------------------------------------------|------------------------------------|---------------------------------|--------------------------|------------------------------------|---------------------------------|--------------------------|
|                                                      | Total costs<br>million \$ (95% CI) | Total QALYs<br>million (95% CI) | ICER<br>\$/QALY (95% CI) | Total costs<br>million \$ (95% CI) | Total QALYs<br>million (95% CI) | ICER<br>\$/QALY (95% CI) |
| <b>China</b>                                         |                                    |                                 |                          |                                    |                                 |                          |
| Optimal pathway using<br>median income as threshold  | 135 523<br>(117 264, 151 530)      | 62 177<br>(53 911, 72 071)      | ..                       | 59 222<br>(53 732, 63 311)         | 19 922<br>(18 818, 21 122)      | ..                       |
| Optimal pathway using<br>GDP per capita as threshold | 150 632<br>(129 921, 172 238)      | 62 183<br>(53 917, 72 078)      | 2291<br>(1748, 3377)     | 65 916<br>(58 970, 71 486)         | 19 924<br>(18 820, 21 124)      | 4344<br>(3357, 6056)     |
| <b>Urban area</b>                                    |                                    |                                 |                          |                                    |                                 |                          |
| Optimal pathway using<br>median income as threshold  | 108 875<br>(93 177, 123 739)       | 46 299<br>(40 442, 53 509)      | ..                       | 47 250<br>(42 273, 51 218)         | 14 701<br>(13 876, 15 669)      | ..                       |
| Optimal pathway using<br>GDP per capita as threshold | 120 690<br>(102 113, 139 856)      | 46 305<br>(40 447, 53 515)      | 2247<br>(1597, 3488)     | 52 571<br>(46 353, 58 344)         | 14 702<br>(13 877, 15 670)      | 4305<br>(3115, 6154)     |
| <b>Rural area</b>                                    |                                    |                                 |                          |                                    |                                 |                          |
| Optimal pathway using<br>median income as threshold  | 26 648<br>(21 842, 31 565)         | 15 877<br>(13 294, 19 488)      | ..                       | 11 972<br>(10 405, 13 413)         | 5222<br>(4736, 5822)            | ..                       |
| Optimal pathway using<br>GDP per capita as threshold | 29 942<br>(24 469, 35 761)         | 15 878<br>(13 295, 19 489)      | 2462<br>(1793, 3672)     | 13 346<br>(11 511, 15 109)         | 5222<br>(4737, 5822)            | 4503<br>(3386, 6292)     |

QALY, quality-adjusted life-year; ICER, incremental cost-effectiveness ratio.

\* Components may not sum to totals due to rounding.

**Table S11.** Estimated cervical cancer cases and deaths averted for optimal pathway (use GDP per capita as threshold) vs. status quo\*

| Period       | Cervical cancer cases averted    |                                   |                                  | Cervical cancer deaths averted   |                                  |                               |
|--------------|----------------------------------|-----------------------------------|----------------------------------|----------------------------------|----------------------------------|-------------------------------|
|              | China<br>no. (95% CI)            | Urban area<br>no. (95% CI)        | Rural area<br>no. (95% CI)       | China<br>no. (95% CI)            | Urban area<br>no. (95% CI)       | Rural area<br>no. (95% CI)    |
| 2021–30      | 111 083<br>(98 742, 123 390)     | 84 569<br>(74 722, 94 126)        | 26 514<br>(22 126, 30 749)       | 32 565<br>(30 981, 34 207)       | 22 827<br>(21 443, 24 142)       | 9 738<br>(9 021, 10 500)      |
| 2031–40      | 975 672<br>(943 017, 1009 372)   | 765 370<br>(730 500, 800 632)     | 210 302<br>(187 132, 233 147)    | 265 704<br>(257 398, 274 362)    | 204 552<br>(195 316, 213 898)    | 61 152<br>(54 495, 67 473)    |
| 2041–50      | 1268 590<br>(1228 737, 1320 512) | 1 016 425<br>(973 210, 1 067 818) | 252 165<br>(218 342, 288 857)    | 415 189<br>(403 243, 429 063)    | 336 349<br>(321 605, 352 189)    | 78 840<br>(66 820, 91 297)    |
| 2051–60      | 1267 468<br>(1226 103, 1331 171) | 989 151<br>(945 395, 1 050 744)   | 278 318<br>(242 642, 318 430)    | 442 344<br>(429 769, 457 883)    | 357 532<br>(342 188, 375 361)    | 84 812<br>(71 194, 99 286)    |
| 2061–70      | 1211 769<br>(1152 624, 1294 974) | 927 317<br>(871 790, 999 260)     | 284 452<br>(248 300, 327 191)    | 433 225<br>(417 722, 453 810)    | 340 241<br>(323 270, 359 867)    | 92 984<br>(79 542, 107 510)   |
| 2071–80      | 1187 000<br>(1087 254, 1306 793) | 890 458<br>(809 824, 984 797)     | 296 542<br>(257 262, 346 697)    | 420 658<br>(394 560, 451 090)    | 314 831<br>(292 893, 340 930)    | 105 827<br>(92 877, 121 742)  |
| 2081–90      | 1165 217<br>(1028 059, 1341 754) | 861 172<br>(757 751, 991 408)     | 304 045<br>(255 821, 368 804)    | 433 138<br>(395 738, 489 460)    | 319 839<br>(289 579, 362 590)    | 113 299<br>(98 578, 134 674)  |
| 2091–2100    | 1125 492<br>(946 154, 1347 152)  | 824 166<br>(691 958, 989 329)     | 301 326<br>(244 812, 378 415)    | 420 892<br>(372 412, 499 505)    | 312 349<br>(275 049, 372 249)    | 108 542<br>(90 588, 134 069)  |
| <b>Total</b> | 8312 291<br>(7710 690, 9075 118) | 6358 628<br>(5855 150, 6978 114)  | 1953 664<br>(1676 437, 2292 290) | 2863 715<br>(2701 823, 3089 380) | 2208 520<br>(2061 343, 2401 226) | 655 194<br>(563 115, 766 551) |

\* Components may not sum to totals due to rounding.

### ***2.3.2 Annual costs and benefits***

The annual undiscounted and discounted costs from all four components for optimal pathway (use GDP per capita as threshold) are shown in Figure S11. Total annual undiscounted costs would be highest in 2021–35 due to the scale-up of catch-up vaccination and cervical cancer screening, while from 2036 onwards, the total costs of each three years (equal to screening interval of unvaccinated cohorts) would decrease continuously (Figure S11a). Total annual discounted costs would highest in first five years with the peak at 2025, and then decrease to about \$59 million in 2100 (Figure S11b).

The annual undiscounted and discounted incremental benefits (QALYs) of optimal pathway (use GDP per capita as threshold) compared to status quo are shown in Figure S12. For undiscounted incremental benefits, the values would be negative in first few years before 2027 (filled with red colour) because more women with CIN and invasive cancer would be diagnosed, however, values would substantially increase after that and maintain at about 1.1 million incremental QALYs from 2070 onwards (Figure S12a). For discounted incremental benefits, although the incremental benefits in the first few years would be negative, the value would always be positive from 2027 onwards with the peak among 2050s (Figure S12b).

■ Vaccination   
 ■ Screening   
 ■ CIN treatment   
 ■ Invasive cancer treatment

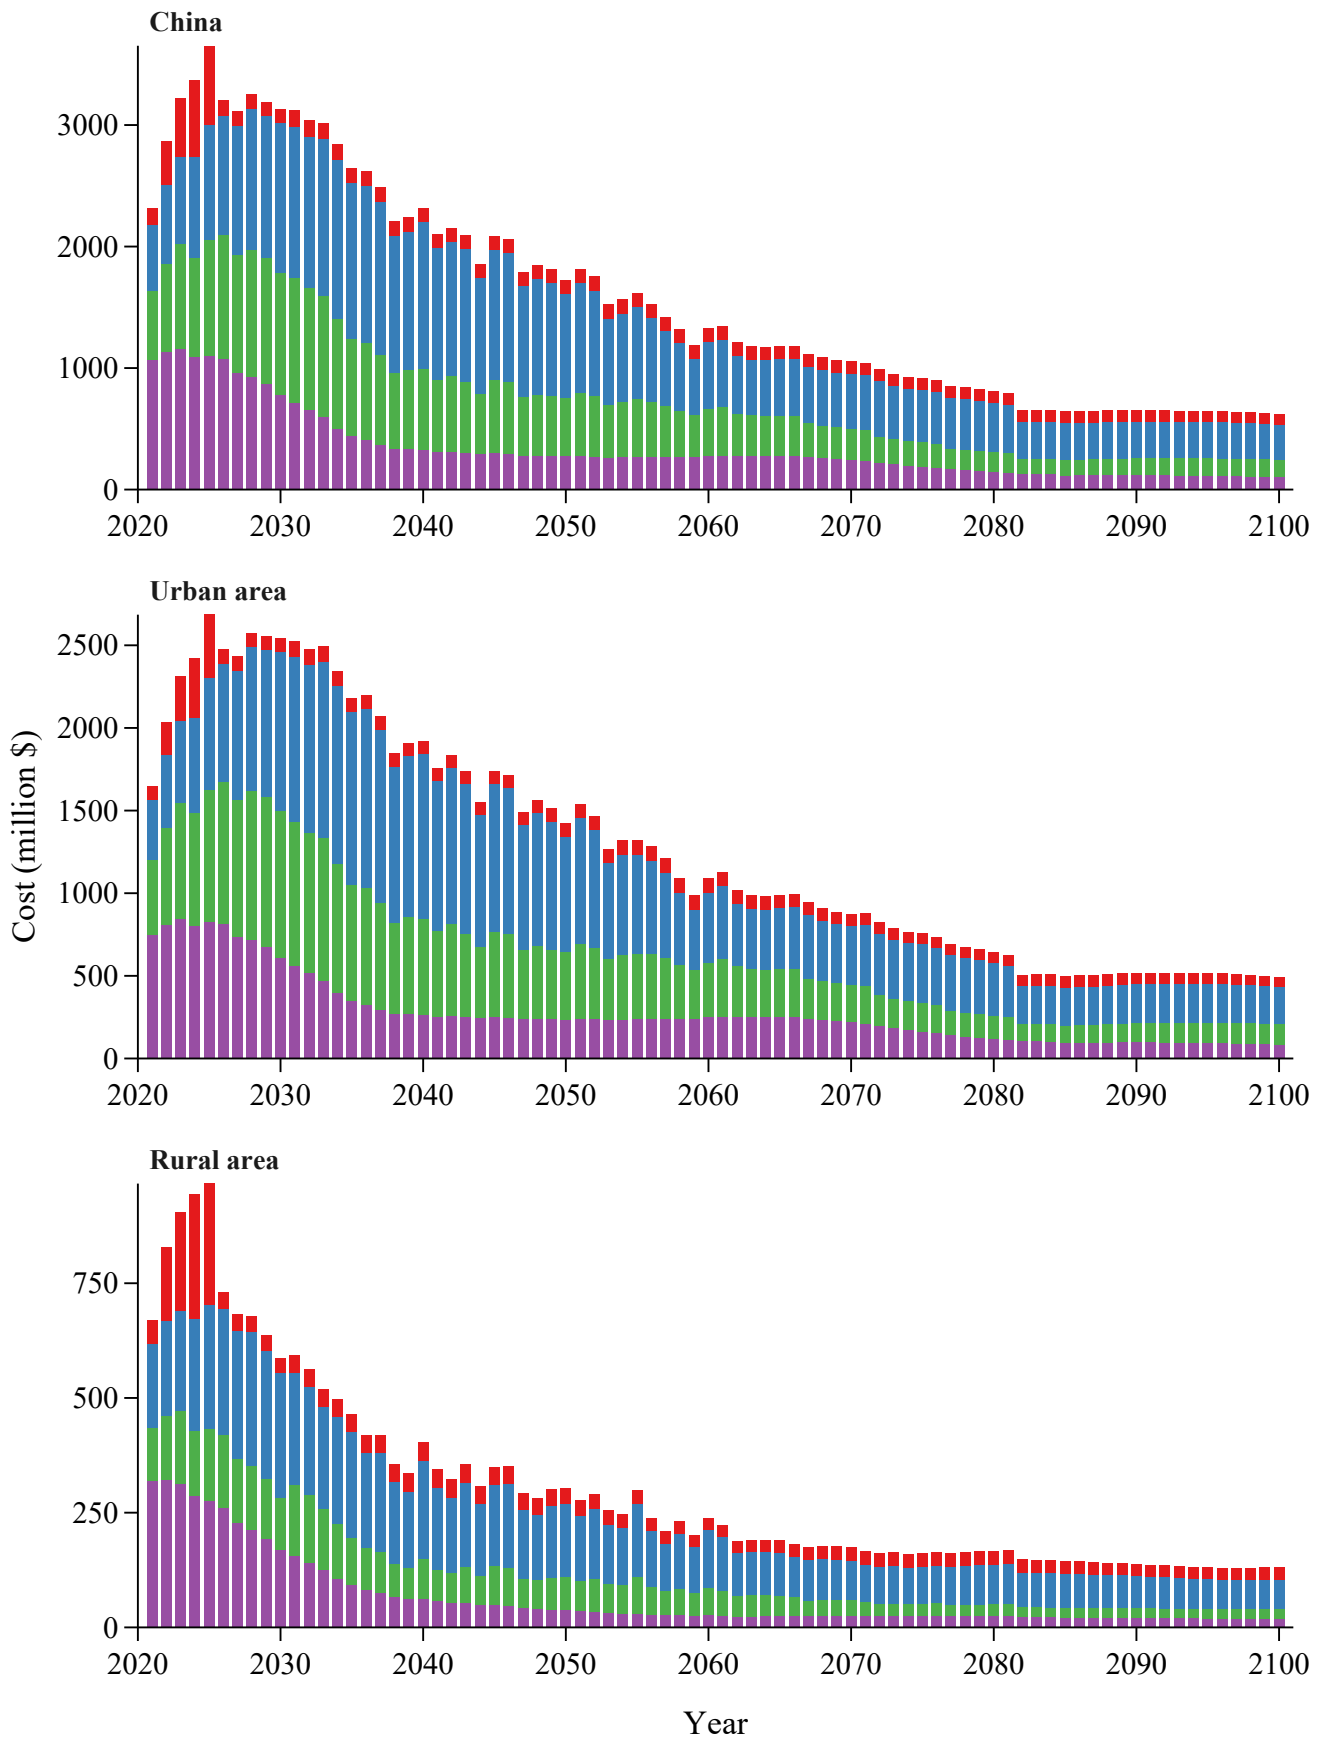

**Figure S11a.** Annual costs of optimal pathway (use GDP per capita as threshold) (0% discount)

■ Vaccination   
 ■ Screening   
 ■ CIN treatment   
 ■ Invasive cancer treatment

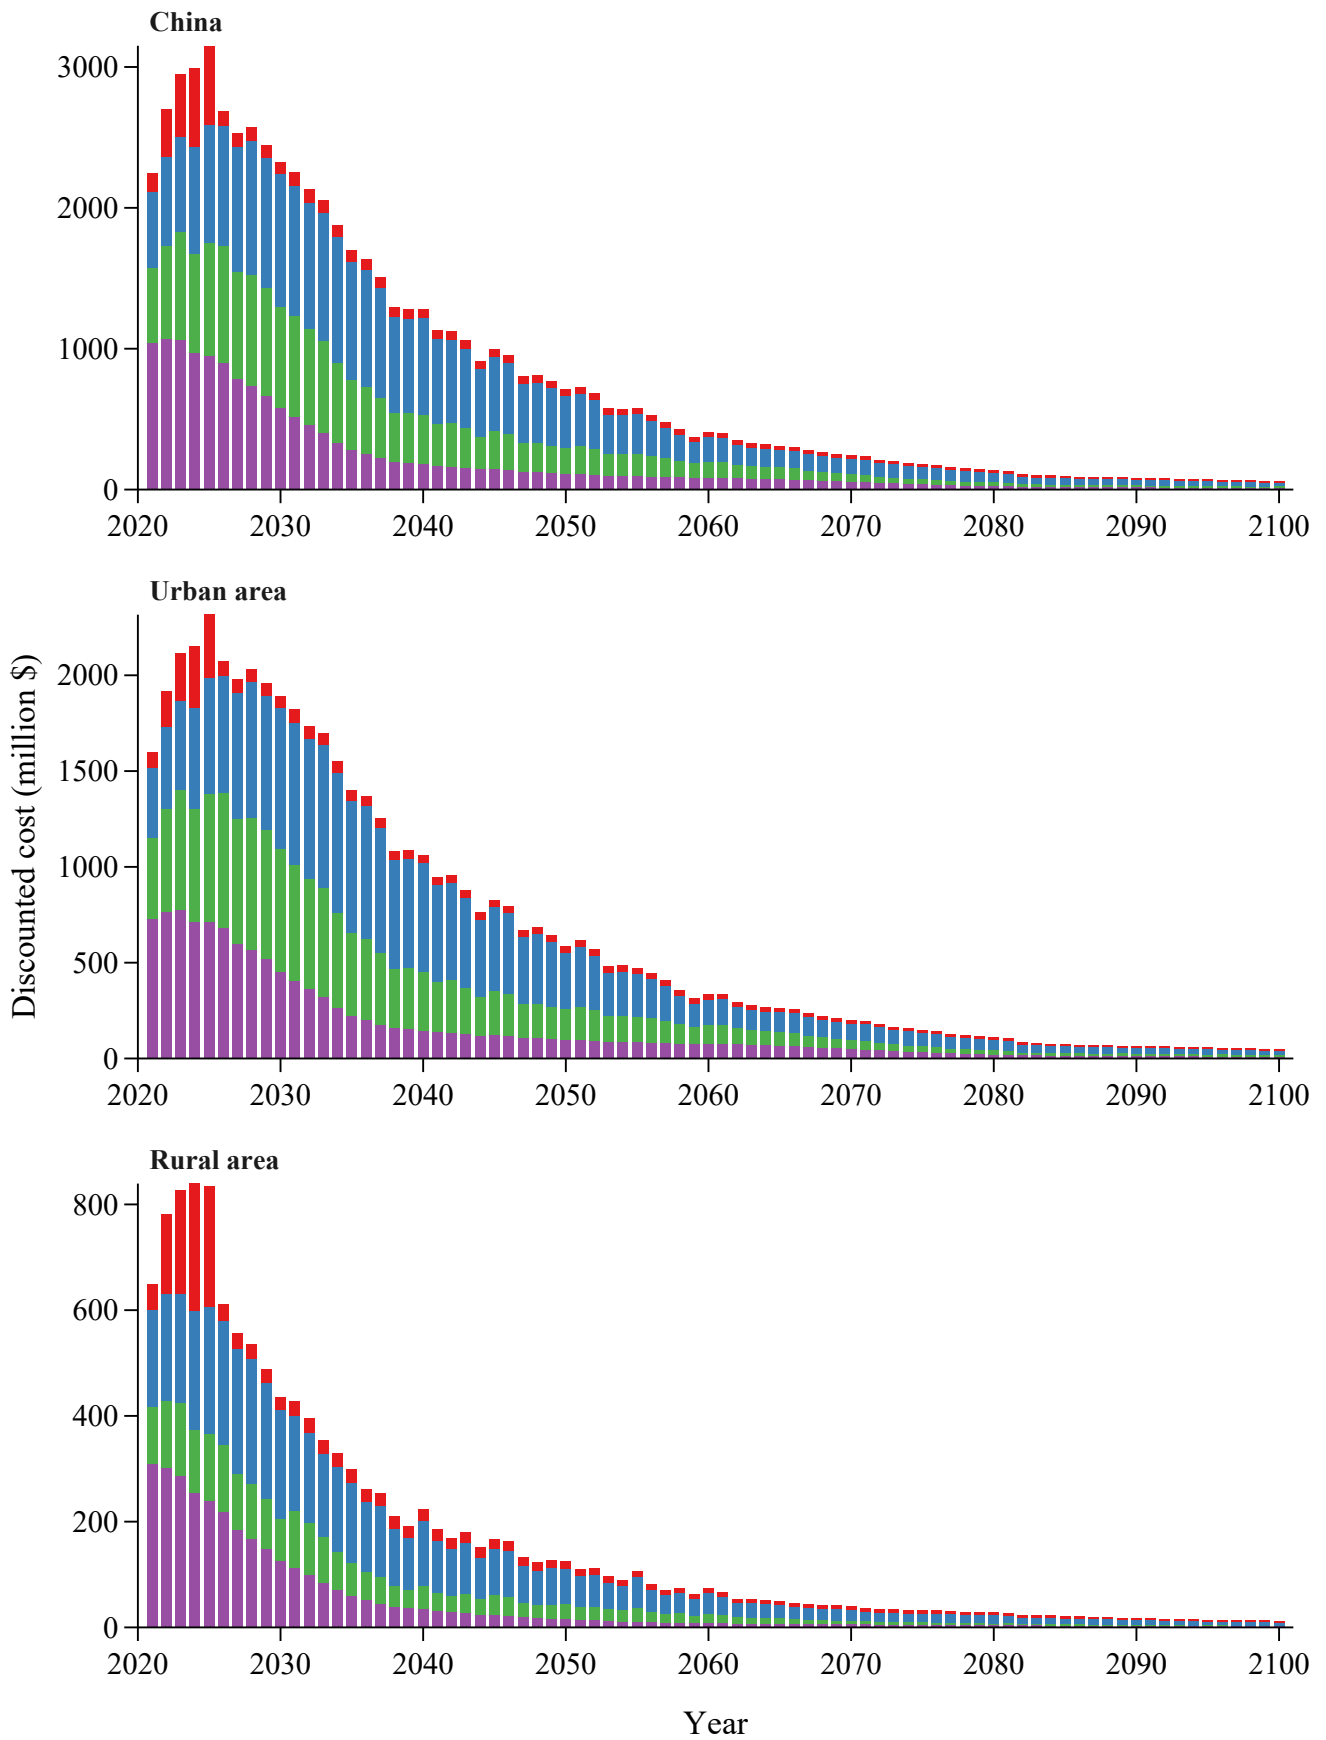

**Figure S11b.** Annual costs of optimal pathway (use GDP per capita as threshold) (3% discount)

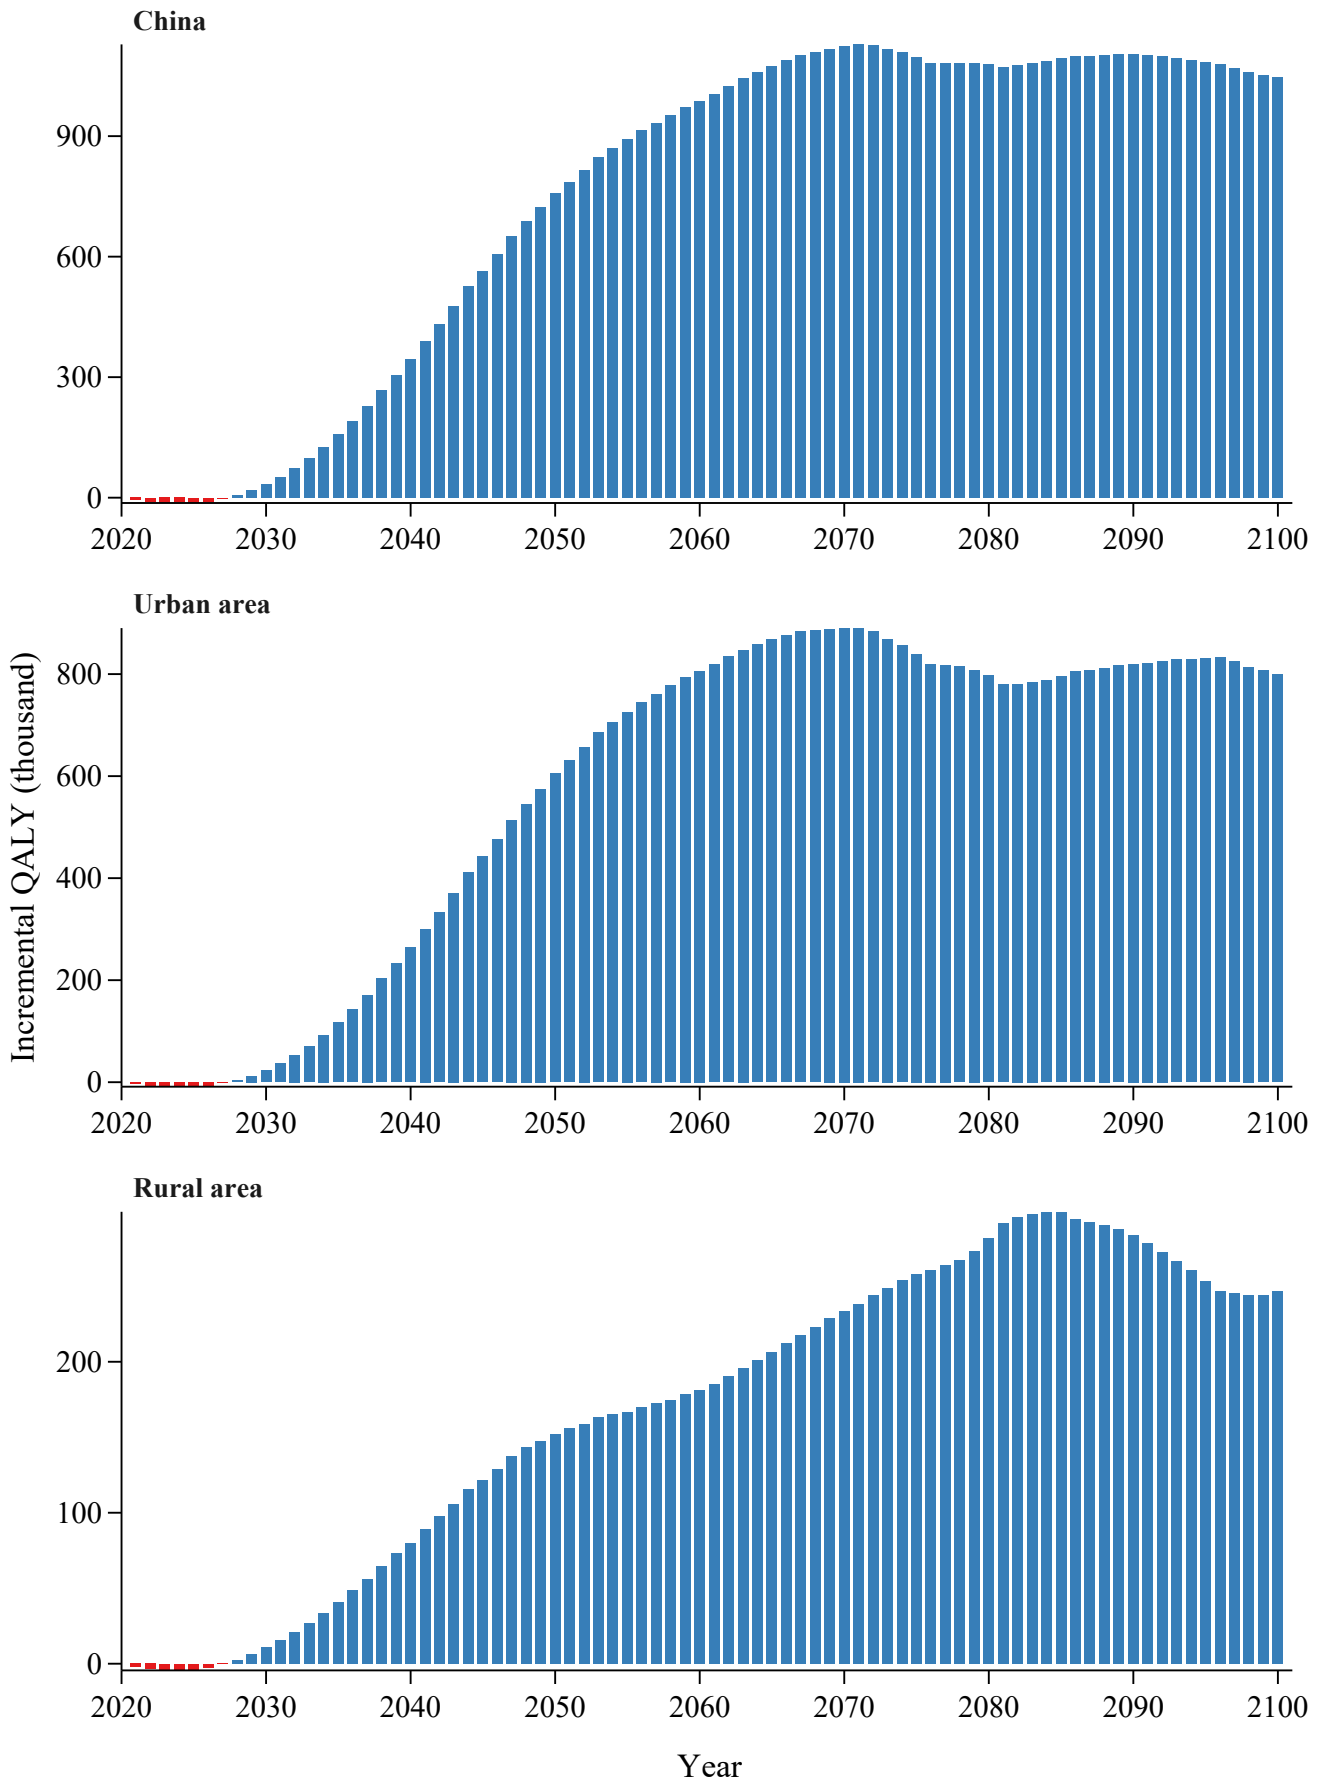

**Figure S12a.** Annual incremental benefits of optimal pathway (use GDP per capita as threshold) compared to status quo (0% discount)

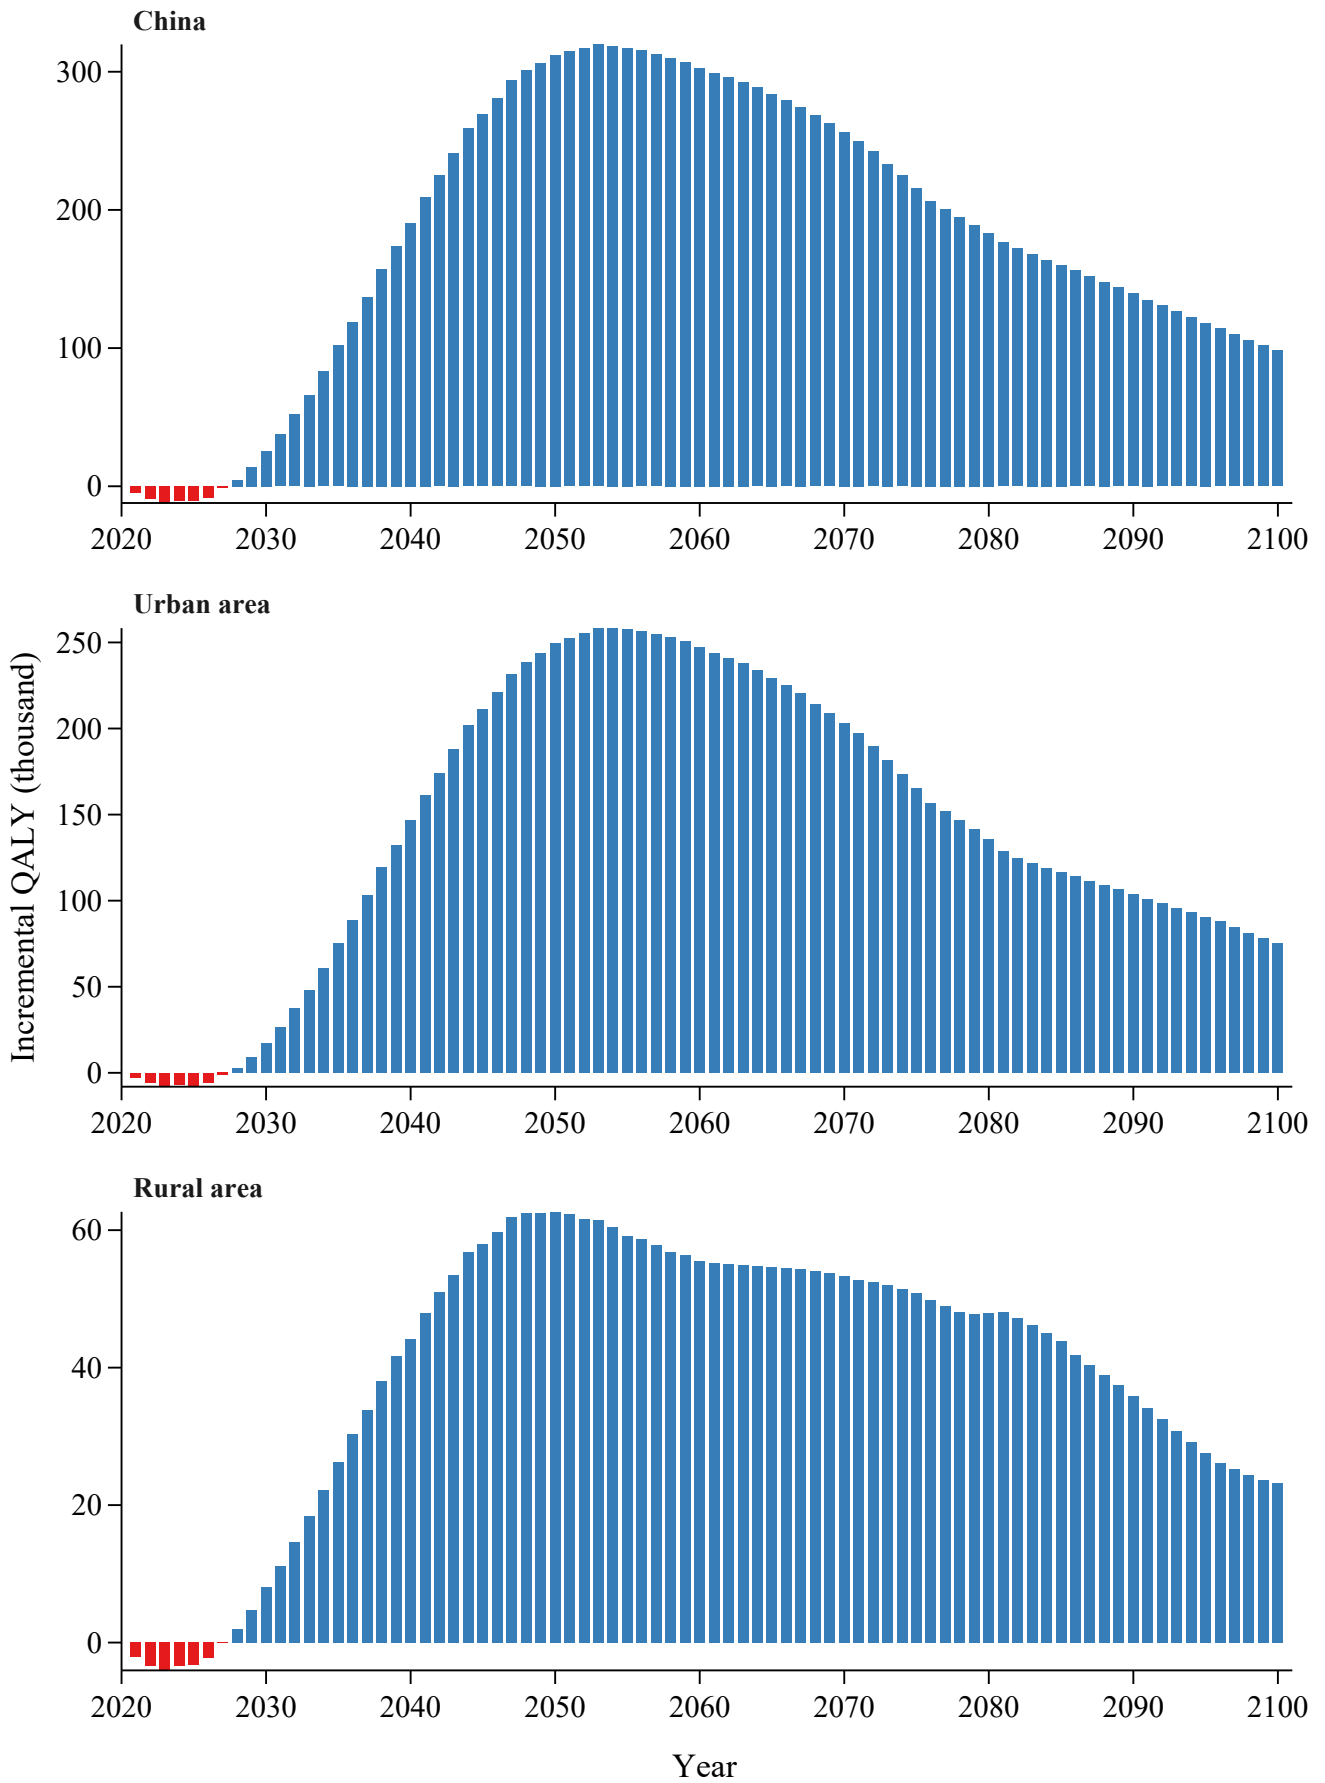

**Figure U32d.** Annual incremental benefits of optimal pathway (use GDP per capita as threshold) compared to status quo (3% discount)



### 3. References

1. Xia C, Hu S, Xu X, Zhao X, Qiao Y, Broutet N, et al. Projections up to 2100 and a budget optimisation strategy towards cervical cancer elimination in China: a modelling study. *Lancet Public Health* 2019;4(9):e462-e72.
2. National Working Committee on Children and Women under State Council. CPPCC National Committee member Yu Luming: Introducing HPV vaccine into the national immunization program. [http://www.nwccw.gov.cn/2020-05/22/content\\_284491.htm](http://www.nwccw.gov.cn/2020-05/22/content_284491.htm). Accessed 6 Jul 2020.
3. Vaccine and Immunization Branch Chinese Preventive Medicine Association. Expert consensus on immunological prevention of human papillomavirus-related diseases. *Chinese Journal of Preventive Medicine* 2019;53(8):761-803.
4. Zhao F, Qiao Y. Cervical cancer prevention in China: a key to cancer control. *Lancet* 2019;393(10175):969-70.
5. National Medical Products Administration. First domestic recombinant human papillomavirus vaccine approved. <https://www.nmpa.gov.cn/yaowen/ypjgyw/20191231160701608.html>. Accessed 6 Aug 2020.
6. Qiao YL, Wu T, Li RC, Hu YM, Wei LH, Li CG, et al. Efficacy, Safety, and Immunogenicity of an Escherichia coli-Produced Bivalent Human Papillomavirus Vaccine: An Interim Analysis of a Randomized Clinical Trial. *J Natl Cancer Inst* 2020;112(2):145-53.
7. China Global Television Network. China-made HPV vaccine comes to the rescue. <https://news.cgtn.com/news/2020-01-09/China-made-HPV-vaccine-comes-to-the-rescue-N7kwyGP9yo/index.html>. Accessed 16 Apr 2020.
8. Gavi. HPV vaccine manufacturers commit to provide enough supply to immunise at least 84 million girls in Gavi countries. <https://www.gavi.org/news/media-room/hpv-vaccine-manufacturers-commit-provide-enough-supply-immunise-least-84-million>. Accessed 7 Jul 2020.
9. Gavi. Gavi-supported HPV vaccines profiles to support country decision making. [https://www.gavi.org/sites/default/files/document/2020/Gavi-HPV-vaccine-profiles\\_May%202020.pdf](https://www.gavi.org/sites/default/files/document/2020/Gavi-HPV-vaccine-profiles_May%202020.pdf). Accessed 7 Jul 2020.
10. Yu W, Lu M, Wang H, Rodewald L, Ji S, Ma C, et al. Routine immunization services costs and financing in China, 2015. *Vaccine* 2018;36(21):3041-7.
11. Centers for Disease Control and Prevention. CDC Vaccine Price List. <https://www.cdc.gov/vaccines/programs/vfc/awardees/vaccine-management/price-list/>. Accessed 16 Apr 2020.
12. DRUGDATAEXPY. Information of Drug Winning Bid. <https://data.yaozh.com/yaopinzhongbiao>. Accessed 16 Apr 2020.
13. Beijing Municipal Health Commission. Optimizing and Integrating Screening of Cancers of Cervical and Breast in Beijing: Government Notification. [http://wjw.beijing.gov.cn/zwgk\\_20040/fgwj/gfxwj/201912/t20191216\\_1239755.html](http://wjw.beijing.gov.cn/zwgk_20040/fgwj/gfxwj/201912/t20191216_1239755.html). Accessed 21 Apr 2020.
14. China Hainan Government Procurement. Hainan Women's and Children's Medical Center - HPV testing reagents and related services for women's common diseases and "two cancers" in 2019 -

bid winning announcement. [https://www.ccgp-hainan.gov.cn/cgw/cgw\\_show\\_zbgg.jsp?id=21831](https://www.ccgp-hainan.gov.cn/cgw/cgw_show_zbgg.jsp?id=21831). Accessed 24 Apr 2020.

15. Zhejiang Government Procurement Center. Announcement of bid winning (transaction) results of "two cancer" examination project of provincial Health Commission, HPV and TCT test reagent project. [http://zfcg.czt.zj.gov.cn/innerUsed\\_noticeDetails/index.html?noticeId=6604290](http://zfcg.czt.zj.gov.cn/innerUsed_noticeDetails/index.html?noticeId=6604290). Accessed 24 Apr 2020.
16. Jiangsu Public Resource Trading Platform. TCT and HPV test service project of "two cancers" program in Tongzhou District, Nantong City. <http://jsggzy.jszfwf.gov.cn/jyxx/003004/003004002/20200421/f67ce97c-e4f6-44b3-977e-4bc17d5930df.html>. Accessed 24 Apr 2020.
17. Peng JR, Tao SY, Wen Y, Yang X, Ma JQ, Zhao F, et al. Cost-effectiveness analysis of cervical cancer screening strategies in urban China. *Chinese Journal of Oncology* 2019;41(2):154-60.
18. Zhao FH, Lewkowitz AK, Hu SY, Chen F, Li LY, Zhang QM, et al. Prevalence of human papillomavirus and cervical intraepithelial neoplasia in China: a pooled analysis of 17 population-based studies. *Int J Cancer* 2012;131(12):2929-38.
19. ICO/IARC Information Centre on HPV and Cancer. Human Papillomavirus and Related Diseases in China: HPV Information Centre; 2018.
20. National Bureau of Statistics of China. Residents' income and consumption expenditure in 2019. [http://www.stats.gov.cn/tjsj/zxfb/202001/t20200117\\_1723396.html](http://www.stats.gov.cn/tjsj/zxfb/202001/t20200117_1723396.html). Accessed 21 Apr 2020.
21. Tao SY, Peng JR, Wang Y, Zhang GT, Chen ZY, Zhao F, et al. Study on direct economic burden and influencing factors in patients with cervical cancer and precancerous lesions. *Chinese Journal of Preventive Medicine* 2018;52(12):1281-6.
22. Haeussler KD. A dynamic Bayesian Markov model for health economic evaluations of interventions in infectious disease. London: UCL (University College London); 2017.
23. Haeussler K, den Hout AV, Baio G. A dynamic Bayesian Markov model for health economic evaluations of interventions in infectious disease. *BMC Med Res Methodol* 2018;18(1):82.
24. Liu YJ, Zhang Q, Hu SY, Zhao FH. Effect of vaccination age on cost-effectiveness of human papillomavirus vaccination against cervical cancer in China. *BMC Cancer* 2016;16:164.
25. Canfell K, Barnabas R, Patnick J, Beral V. The predicted effect of changes in cervical screening practice in the UK: results from a modelling study. *Br J Cancer* 2004;91(3):530-6.
26. Goldie SJ, Grima D, Kohli M, Wright TC, Weinstein M, Franco E. A comprehensive natural history model of HPV infection and cervical cancer to estimate the clinical impact of a prophylactic HPV-16/18 vaccine. *Int J Cancer* 2003;106(6):896-904.
27. Haeussler K, Marcellusi A, Mennini FS, Favato G, Picardo M, Garganese G, et al. Cost-Effectiveness Analysis of Universal Human Papillomavirus Vaccination Using a Dynamic Bayesian Methodology: The BEST II Study. *Value Health* 2015;18(8):956-68.
28. Myers ER, McCrory DC, Nanda K, Bastian L, Matchar DB. Mathematical model for the natural history of human papillomavirus infection and cervical carcinogenesis. *Am J Epidemiol* 2000;151(12):1158-71.
29. Yokoyama M, Iwasaka T, Nagata C, Nozawa S, Sekiya S, Hirai Y, et al. Prognostic factors

associated with the clinical outcome of cervical intraepithelial neoplasia: a cohort study in Japan. *Cancer Lett* 2003;192(2):171-9.

30. Sawaya GF, Sanstead E, Alarid-Escudero F, Smith-McCune K, Gregorich SE, Silverberg MJ, et al. Estimated Quality of Life and Economic Outcomes Associated With 12 Cervical Cancer Screening Strategies: A Cost-effectiveness Analysis. *JAMA Intern Med* 2019;179(7):867-78.
31. Johnson HC, Elfstrom KM, Edmunds WJ. Inference of type-specific HPV transmissibility, progression and clearance rates: a mathematical modelling approach. *PLoS One* 2012;7(11):e49614.
32. Brisson M, Kim JJ, Canfell K, Drolet M, Gingras G, Burger EA, et al. Impact of HPV vaccination and cervical screening on cervical cancer elimination: a comparative modelling analysis in 78 low-income and lower-middle-income countries. *Lancet* 2020;395(10224):575-90.
33. Canfell K, Kim JJ, Brisson M, Keane A, Simms KT, Caruana M, et al. Mortality impact of achieving WHO cervical cancer elimination targets: a comparative modelling analysis in 78 low-income and lower-middle-income countries. *Lancet* 2020;395(10224):591-603.
34. Abbas KM, van Zandvoort K, Brisson M, Jit M. Effects of updated demography, disability weights, and cervical cancer burden on estimates of human papillomavirus vaccination impact at the global, regional, and national levels: a PRIME modelling study. *Lancet Glob Health* 2020;8(4):e536-e44.
35. Pan QJ, Hu SY, Zhang X, Ci PW, Zhang WH, Guo HQ, et al. Pooled analysis of the performance of liquid-based cytology in population-based cervical cancer screening studies in China. *Cancer Cytopathol* 2013;121(9):473-82.
36. Ma L, Wang Y, Gao X, Dai Y, Zhang Y, Wang Z, et al. Economic evaluation of cervical cancer screening strategies in urban China. *Chin J Cancer Res* 2019;31(6):974-83.
37. van Rosmalen J, de Kok IM, van Ballegooijen M. Cost-effectiveness of cervical cancer screening: cytology versus human papillomavirus DNA testing. *BJOG* 2012;119(6):699-709.
38. Zhao ZM, Pan XF, Lv SH, Xie Y, Zhang SK, Qiao YL, et al. Quality of life in women with cervical precursor lesions and cancer: a prospective, 6-month, hospital-based study in China. *Chin J Cancer* 2014;33(7):339-45.
39. Haacker M, Hallett TB, Atun R. On discount rates for economic evaluations in global health. *Health Policy Plan* 2020;35(1):107-14.
40. National Bureau of Statistics of China. National Data. <http://data.stats.gov.cn/english/>. Accessed 11 Mar 2020.
41. National Bureau of Statistics of China. *China Population and Employment Statistics Yearbook 2016*. Beijing: China Statistics Press; 2017.
42. National Health and Family Planning Commission. *2016 China Health Statistics Yearbook*. Beijing: Peking Union Medical College Press; 2016.
43. He J. *2018 China Cancer Registry Annual Report*. Beijing: People's Medical Publishing House; 2019.
